# Supplementary material for: Response of Chironomids (Diptera, Chironomidae) to Environmental Factors at Different Spatial Scales
Source: Preprints.org preprint supplement (doi:10.20944/preprints202403.0970.v1), 2024-03-18
Supplement: Supplementary file 1 [file supplementary]

## Sheet: probenv
seq		altitude	dist_sorg_staz	cond	O2	temp	O2percsat	pH	TP	NH4ug	MEM1	MEM2	MEM3	MEM4	MEM5	MEM6	MEM7	MEM8	MEM9	MEM10	MEM11	MEM12	MEM13	MEM14	MEM15	MEM16	MEM17	MEM18	MEM19	MEM20	MEM21	MEM22	MEM23	MEM24	MEM25	MEM26	MEM27	MEM28	MEM29	MEM30	MEM31	MEM32	MEM33	MEM34	MEM35	MEM36	MEM37	MEM38	MEM39
1	altitude	NA	1.53516e-07	0.000149119	0.238897	4.44089e-16	0.337979	5.54947e-08	0.00358401	0.0189848	1.56552e-06	0.160831	0.468524	4.63382e-05	2.64864e-06	1.61568e-05	0.599285	0.640439	0.00268791	0.00235178	0.171285	0.000270259	0.0354215	0.99465	0.00337276	0.906996	0.736429	0.00578303	0.0359734	0.977764	0.539453	0.00563217	0.345436	0.453927	0.0246116	0.400819	0.509629	0.0950753	0.143042	0.895657	0.506709	0.907243	0.809443	0.251459	0.829161	0.941839	0.156066	0.949833	0.891215
2	dist_sorg_staz	1.53516e-07	NA	0.816836	0.0233919	2.39094e-06	0.000334134	0.0426455	1.20837e-12	0.159395	0.733391	0.00923142	0.0509676	0.421114	0.0091068	0.000432547	0.0846152	0.244652	3.09212e-07	0.279714	3.6605e-06	0.036929	0.0266554	0.211152	0.265697	0.630438	0.00924276	0.052782	0.571352	0.281527	0.737173	0.526174	0.0137204	0.048373	0.806897	0.216572	0.338449	0.191474	0.0560898	0.566664	0.84542	0.714626	0.333833	0.979607	0.485411	0.316231	0.190368	0.0603706	0.448618
3	cond	0.000149119	0.816836	NA	0.307348	0.000547511	0.642595	9.44415e-08	0.608394	0.355007	0	0	9.2271e-10	0.0277619	0.000914548	0.958058	0.011426	0.0797217	0.236073	0.539309	0.162378	0.397293	0.167623	0.843894	0.265356	0.692473	0.577881	0.994126	0.889706	0.318882	0.985909	0.178082	0.430862	0.505514	0.658544	0.0407081	0.271619	0.745047	0.494852	0.18781	0.99478	0.515882	0.495374	0.728014	0.591786	0.815866	0.428378	0.630015	0.759608
4	O2	0.238897	0.0233919	0.307348	NA	0.622398	0	1.96515e-07	2.04107e-06	0.344801	0.000165574	0.856491	5.22834e-06	2.44604e-12	0.592456	0.93649	0.569253	0.578376	0.0110471	0.0135839	0.110313	0.021057	0.141252	0.00787901	0.909781	0.465888	5.76081e-05	0.888683	0.619731	0.567575	0.0735464	0.174882	0.582572	0.128651	0.012315	0.302105	0.0408614	0.605567	0.394724	0.152619	0.221565	0.505157	0.547006	0.291484	0.626514	0.797751	0.85951	0.844655	0.799837
5	temp	4.44089e-16	2.39094e-06	0.000547511	0.622398	NA	0.202292	0.000126593	0.0430643	0.322996	6.6084e-05	0.615915	0.128804	0.0707472	1.93979e-10	0.822924	0.772514	0.0667686	0.0421424	0.757008	0.115014	0.0232678	0.00465425	0.223335	0.00915578	0.928808	0.16303	0.865531	0.31078	0.0223146	0.692813	0.565212	0.476965	0.808426	0.0165127	0.963989	0.296436	0.0752984	0.971821	0.594639	0.227637	0.214379	0.0247202	0.087866	0.230094	0.014478	0.707758	0.700804	0.910121
6	O2percsat	0.337979	0.000334134	0.642595	0	0.202292	NA	1.06635e-05	5.92364e-10	0.964761	0.0378048	0.691244	0.484397	1.84591e-05	0.919637	0.452386	0.34094	0.0366838	0.0507698	0.813355	0.642097	0.0397334	0.575629	0.000379699	0.000132274	0.00209179	0.0164381	0.734203	0.0742089	0.118471	0.0653019	0.00959456	0.894252	0.83486	0.00705455	0.364105	0.494665	0.493652	0.989644	0.782237	0.600008	0.0101113	0.0282211	0.000691493	0.630129	0.0960426	0.274126	0.278067	0.610085
7	pH	5.54947e-08	0.0426455	9.44415e-08	1.96515e-07	0.000126593	1.06635e-05	NA	0.0283155	0.0518448	0.00192046	0.0172341	1.69398e-05	3.68324e-06	0.036982	0.880057	0.0160297	0.78098	0.00126117	0.00109775	0.021093	1.00513e-06	0.0882833	2.88469e-05	0.0967917	0.182904	0.668941	0.949628	0.687657	0.0729865	0.708373	0.0146504	0.0915011	0.00744475	0.16259	0.0817618	0.510618	0.0669162	0.486186	0.382181	0.468689	0.462851	0.66025	0.445026	0.398735	0.490386	0.19393	0.273952	0.78898
8	TP	0.00358401	1.20837e-12	0.608394	2.04107e-06	0.0430643	5.92364e-10	0.0283155	NA	0.0114999	0.0805799	0.00784747	0.895434	0.469949	0.376782	6.82304e-06	0.196384	0.0336142	0.409198	0.435136	0.114116	0.149494	0.00111737	0.00191399	0.003649	0.663822	0.373948	0.597783	0.461279	0.472543	0.31408	0.429127	0.611093	0.325652	0.191096	0.437747	0.501804	0.0219463	0.787139	0.0936711	0.113317	0.736657	0.248865	0.0136777	0.398483	0.0126433	0.607498	0.393298	0.206086
9	NH4ug	0.0189848	0.159395	0.355007	0.344801	0.322996	0.964761	0.0518448	0.0114999	NA	0.59829	0.0168167	0.659462	0.00136848	0.362727	0.59726	0.719802	0.521469	0.0996245	0.00656476	2.35811e-13	0.00675529	0.785494	0.0212918	0.141808	2.43126e-05	0.00865642	0.0763876	0.00489209	0.434018	0.527322	0.0114188	0.028463	0.1288	0.0420008	0.000843309	0.116634	0.0209289	0.149316	0.943507	0.706739	0.726868	0.0696533	0.0753262	0.70346	0.722866	0.451041	0.290207	0.190742
10	MEM1	1.56552e-06	0.733391	0	0.000165574	6.6084e-05	0.0378048	0.00192046	0.0805799	0.59829	NA	1	1	1	1	1	1	1	1	1	1	1	1	1	1	1	1	1	1	1	1	1	1	1	1	1	1	1	1	1	1	1	1	1	1	1	1	1	1
11	MEM2	0.160831	0.00923142	0	0.856491	0.615915	0.691244	0.0172341	0.00784747	0.0168167	1	NA	1	1	1	1	1	1	1	1	1	1	1	1	1	1	1	1	1	1	1	1	1	1	1	1	1	1	1	1	1	1	1	1	1	1	1	1	1
12	MEM3	0.468524	0.0509676	9.2271e-10	5.22834e-06	0.128804	0.484397	1.69398e-05	0.895434	0.659462	1	1	NA	1	1	1	1	1	1	1	1	1	1	1	1	1	1	1	1	1	1	1	1	1	1	1	1	1	1	1	1	1	1	1	1	1	1	1	1
13	MEM4	4.63382e-05	0.421114	0.0277619	2.44604e-12	0.0707472	1.84591e-05	3.68324e-06	0.469949	0.00136848	1	1	1	NA	1	1	1	1	1	1	1	1	1	1	1	1	1	1	1	1	1	1	1	1	1	1	1	1	1	1	1	1	1	1	1	1	1	1	1
14	MEM5	2.64864e-06	0.0091068	0.000914548	0.592456	1.93979e-10	0.919637	0.036982	0.376782	0.362727	1	1	1	1	NA	1	1	1	1	1	1	1	1	1	1	1	1	1	1	1	1	1	1	1	1	1	1	1	1	1	1	1	1	1	1	1	1	1	1
15	MEM6	1.61568e-05	0.000432547	0.958058	0.93649	0.822924	0.452386	0.880057	6.82304e-06	0.59726	1	1	1	1	1	NA	1	1	1	1	1	1	1	1	1	1	1	1	1	1	1	1	1	1	1	1	1	1	1	1	1	1	1	1	1	1	1	1	1
16	MEM7	0.599285	0.0846152	0.011426	0.569253	0.772514	0.34094	0.0160297	0.196384	0.719802	1	1	1	1	1	1	NA	1	1	1	1	1	1	1	1	1	1	1	1	1	1	1	1	1	1	1	1	1	1	1	1	1	1	1	1	1	1	1	1
17	MEM8	0.640439	0.244652	0.0797217	0.578376	0.0667686	0.0366838	0.78098	0.0336142	0.521469	1	1	1	1	1	1	1	NA	1	1	1	1	1	1	1	1	1	1	1	1	1	1	1	1	1	1	1	1	1	1	1	1	1	1	1	1	1	1	1
18	MEM9	0.00268791	3.09212e-07	0.236073	0.0110471	0.0421424	0.0507698	0.00126117	0.409198	0.0996245	1	1	1	1	1	1	1	1	NA	1	1	1	1	1	1	1	1	1	1	1	1	1	1	1	1	1	1	1	1	1	1	1	1	1	1	1	1	1	1
19	MEM10	0.00235178	0.279714	0.539309	0.0135839	0.757008	0.813355	0.00109775	0.435136	0.00656476	1	1	1	1	1	1	1	1	1	NA	1	1	1	1	1	1	1	1	1	1	1	1	1	1	1	1	1	1	1	1	1	1	1	1	1	1	1	1	1
20	MEM11	0.171285	3.6605e-06	0.162378	0.110313	0.115014	0.642097	0.021093	0.114116	2.35811e-13	1	1	1	1	1	1	1	1	1	1	NA	1	1	1	1	1	1	1	1	1	1	1	1	1	1	1	1	1	1	1	1	1	1	1	1	1	1	1	1
21	MEM12	0.000270259	0.036929	0.397293	0.021057	0.0232678	0.0397334	1.00513e-06	0.149494	0.00675529	1	1	1	1	1	1	1	1	1	1	1	NA	1	1	1	1	1	1	1	1	1	1	1	1	1	1	1	1	1	1	1	1	1	1	1	1	1	1	1
22	MEM13	0.0354215	0.0266554	0.167623	0.141252	0.00465425	0.575629	0.0882833	0.00111737	0.785494	1	1	1	1	1	1	1	1	1	1	1	1	NA	1	1	1	1	1	1	1	1	1	1	1	1	1	1	1	1	1	1	1	1	1	1	1	1	1	1
23	MEM14	0.99465	0.211152	0.843894	0.00787901	0.223335	0.000379699	2.88469e-05	0.00191399	0.0212918	1	1	1	1	1	1	1	1	1	1	1	1	1	NA	1	1	1	1	1	1	1	1	1	1	1	1	1	1	1	1	1	1	1	1	1	1	1	1	1
24	MEM15	0.00337276	0.265697	0.265356	0.909781	0.00915578	0.000132274	0.0967917	0.003649	0.141808	1	1	1	1	1	1	1	1	1	1	1	1	1	1	NA	1	1	1	1	1	1	1	1	1	1	1	1	1	1	1	1	1	1	1	1	1	1	1	1
25	MEM16	0.906996	0.630438	0.692473	0.465888	0.928808	0.00209179	0.182904	0.663822	2.43126e-05	1	1	1	1	1	1	1	1	1	1	1	1	1	1	1	NA	1	1	1	1	1	1	1	1	1	1	1	1	1	1	1	1	1	1	1	1	1	1	1
26	MEM17	0.736429	0.00924276	0.577881	5.76081e-05	0.16303	0.0164381	0.668941	0.373948	0.00865642	1	1	1	1	1	1	1	1	1	1	1	1	1	1	1	1	NA	1	1	1	1	1	1	1	1	1	1	1	1	1	1	1	1	1	1	1	1	1	1
27	MEM18	0.00578303	0.052782	0.994126	0.888683	0.865531	0.734203	0.949628	0.597783	0.0763876	1	1	1	1	1	1	1	1	1	1	1	1	1	1	1	1	1	NA	1	1	1	1	1	1	1	1	1	1	1	1	1	1	1	1	1	1	1	1	1
28	MEM19	0.0359734	0.571352	0.889706	0.619731	0.31078	0.0742089	0.687657	0.461279	0.00489209	1	1	1	1	1	1	1	1	1	1	1	1	1	1	1	1	1	1	NA	1	1	1	1	1	1	1	1	1	1	1	1	1	1	1	1	1	1	1	1
29	MEM20	0.977764	0.281527	0.318882	0.567575	0.0223146	0.118471	0.0729865	0.472543	0.434018	1	1	1	1	1	1	1	1	1	1	1	1	1	1	1	1	1	1	1	NA	1	1	1	1	1	1	1	1	1	1	1	1	1	1	1	1	1	1	1
30	MEM21	0.539453	0.737173	0.985909	0.0735464	0.692813	0.0653019	0.708373	0.31408	0.527322	1	1	1	1	1	1	1	1	1	1	1	1	1	1	1	1	1	1	1	1	NA	1	1	1	1	1	1	1	1	1	1	1	1	1	1	1	1	1	1
31	MEM22	0.00563217	0.526174	0.178082	0.174882	0.565212	0.00959456	0.0146504	0.429127	0.0114188	1	1	1	1	1	1	1	1	1	1	1	1	1	1	1	1	1	1	1	1	1	NA	1	1	1	1	1	1	1	1	1	1	1	1	1	1	1	1	1
32	MEM23	0.345436	0.0137204	0.430862	0.582572	0.476965	0.894252	0.0915011	0.611093	0.028463	1	1	1	1	1	1	1	1	1	1	1	1	1	1	1	1	1	1	1	1	1	1	NA	1	1	1	1	1	1	1	1	1	1	1	1	1	1	1	1
33	MEM24	0.453927	0.048373	0.505514	0.128651	0.808426	0.83486	0.00744475	0.325652	0.1288	1	1	1	1	1	1	1	1	1	1	1	1	1	1	1	1	1	1	1	1	1	1	1	NA	1	1	1	1	1	1	1	1	1	1	1	1	1	1	1
34	MEM25	0.0246116	0.806897	0.658544	0.012315	0.0165127	0.00705455	0.16259	0.191096	0.0420008	1	1	1	1	1	1	1	1	1	1	1	1	1	1	1	1	1	1	1	1	1	1	1	1	NA	1	1	1	1	1	1	1	1	1	1	1	1	1	1
35	MEM26	0.400819	0.216572	0.0407081	0.302105	0.963989	0.364105	0.0817618	0.437747	0.000843309	1	1	1	1	1	1	1	1	1	1	1	1	1	1	1	1	1	1	1	1	1	1	1	1	1	NA	1	1	1	1	1	1	1	1	1	1	1	1	1
36	MEM27	0.509629	0.338449	0.271619	0.0408614	0.296436	0.494665	0.510618	0.501804	0.116634	1	1	1	1	1	1	1	1	1	1	1	1	1	1	1	1	1	1	1	1	1	1	1	1	1	1	NA	1	1	1	1	1	1	1	1	1	1	1	1
37	MEM28	0.0950753	0.191474	0.745047	0.605567	0.0752984	0.493652	0.0669162	0.0219463	0.0209289	1	1	1	1	1	1	1	1	1	1	1	1	1	1	1	1	1	1	1	1	1	1	1	1	1	1	1	NA	1	1	1	1	1	1	1	1	1	1	1
38	MEM29	0.143042	0.0560898	0.494852	0.394724	0.971821	0.989644	0.486186	0.787139	0.149316	1	1	1	1	1	1	1	1	1	1	1	1	1	1	1	1	1	1	1	1	1	1	1	1	1	1	1	1	NA	1	1	1	1	1	1	1	1	1	1
39	MEM30	0.895657	0.566664	0.18781	0.152619	0.594639	0.782237	0.382181	0.0936711	0.943507	1	1	1	1	1	1	1	1	1	1	1	1	1	1	1	1	1	1	1	1	1	1	1	1	1	1	1	1	1	NA	1	1	1	1	1	1	1	1	1
40	MEM31	0.506709	0.84542	0.99478	0.221565	0.227637	0.600008	0.468689	0.113317	0.706739	1	1	1	1	1	1	1	1	1	1	1	1	1	1	1	1	1	1	1	1	1	1	1	1	1	1	1	1	1	1	NA	1	1	1	1	1	1	1	1
41	MEM32	0.907243	0.714626	0.515882	0.505157	0.214379	0.0101113	0.462851	0.736657	0.726868	1	1	1	1	1	1	1	1	1	1	1	1	1	1	1	1	1	1	1	1	1	1	1	1	1	1	1	1	1	1	1	NA	1	1	1	1	1	1	1
42	MEM33	0.809443	0.333833	0.495374	0.547006	0.0247202	0.0282211	0.66025	0.248865	0.0696533	1	1	1	1	1	1	1	1	1	1	1	1	1	1	1	1	1	1	1	1	1	1	1	1	1	1	1	1	1	1	1	1	NA	1	1	1	1	1	1
43	MEM34	0.251459	0.979607	0.728014	0.291484	0.087866	0.000691493	0.445026	0.0136777	0.0753262	1	1	1	1	1	1	1	1	1	1	1	1	1	1	1	1	1	1	1	1	1	1	1	1	1	1	1	1	1	1	1	1	1	NA	1	1	1	1	1
44	MEM35	0.829161	0.485411	0.591786	0.626514	0.230094	0.630129	0.398735	0.398483	0.70346	1	1	1	1	1	1	1	1	1	1	1	1	1	1	1	1	1	1	1	1	1	1	1	1	1	1	1	1	1	1	1	1	1	1	NA	1	1	1	1
45	MEM36	0.941839	0.316231	0.815866	0.797751	0.014478	0.0960426	0.490386	0.0126433	0.722866	1	1	1	1	1	1	1	1	1	1	1	1	1	1	1	1	1	1	1	1	1	1	1	1	1	1	1	1	1	1	1	1	1	1	1	NA	1	1	1
46	MEM37	0.156066	0.190368	0.428378	0.85951	0.707758	0.274126	0.19393	0.607498	0.451041	1	1	1	1	1	1	1	1	1	1	1	1	1	1	1	1	1	1	1	1	1	1	1	1	1	1	1	1	1	1	1	1	1	1	1	1	NA	1	1
47	MEM38	0.949833	0.0603706	0.630015	0.844655	0.700804	0.278067	0.273952	0.393298	0.290207	1	1	1	1	1	1	1	1	1	1	1	1	1	1	1	1	1	1	1	1	1	1	1	1	1	1	1	1	1	1	1	1	1	1	1	1	1	NA	1
48	MEM39	0.891215	0.448618	0.759608	0.799837	0.910121	0.610085	0.78898	0.206086	0.190742	1	1	1	1	1	1	1	1	1	1	1	1	1	1	1	1	1	1	1	1	1	1	1	1	1	1	1	1	1	1	1	1	1	1	1	1	1	1	NA
49	MEM40	0.000635035	0.0267381	0.900721	0.300771	0.0431707	0.0100705	0.180626	0.0258684	0.489299	1	1	1	1	1	1	1	1	1	1	1	1	1	1	1	1	1	1	1	1	1	1	1	1	1	1	1	1	1	1	1	1	1	1	1	1	1	1	1
50	MEM41	0.387667	0.126518	0.346866	0.893361	0.583568	0.930816	0.295308	0.20477	0.803851	1	1	1	1	1	1	1	1	1	1	1	1	1	1	1	1	1	1	1	1	1	1	1	1	1	1	1	1	1	1	1	1	1	1	1	1	1	1	1
51	MEM42	0.425239	0.760753	0.498149	0.641248	0.114553	0.189357	0.038507	0.261397	0.684927	1	1	1	1	1	1	1	1	1	1	1	1	1	1	1	1	1	1	1	1	1	1	1	1	1	1	1	1	1	1	1	1	1	1	1	1	1	1	1
52	MEM43	0.173693	0.614069	0.966982	0.991988	0.188799	0.44456	0.670009	0.176633	0.306959	1	1	1	1	1	1	1	1	1	1	1	1	1	1	1	1	1	1	1	1	1	1	1	1	1	1	1	1	1	1	1	1	1	1	1	1	1	1	1
53	MEM44	0.297481	0.573629	0.293861	0.846584	0.96956	0.724068	0.905795	0.204681	0.158603	1	1	1	1	1	1	1	1	1	1	1	1	1	1	1	1	1	1	1	1	1	1	1	1	1	1	1	1	1	1	1	1	1	1	1	1	1	1	1
54	MEM45	0.744655	0.323652	0.286373	0.78358	0.944767	0.93284	0.698747	0.212745	0.229109	1	1	1	1	1	1	1	1	1	1	1	1	1	1	1	1	1	1	1	1	1	1	1	1	1	1	1	1	1	1	1	1	1	1	1	1	1	1	1
55	MEM46	0.0346671	0.811848	0.623173	0.411109	0.0712601	0.953013	0.872706	0.0428585	0.211985	1	1	1	1	1	1	1	1	1	1	1	1	1	1	1	1	1	1	1	1	1	1	1	1	1	1	1	1	1	1	1	1	1	1	1	1	1	1	1
56	MEM47	0.73258	0.754579	0.985539	0.743484	0.379857	0.952748	0.858894	0.184409	0.769694	1	1	1	1	1	1	1	1	1	1	1	1	1	1	1	1	1	1	1	1	1	1	1	1	1	1	1	1	1	1	1	1	1	1	1	1	1	1	1
57	MEM48	0.933394	0.384606	0.363657	0.299867	0.937117	0.040781	0.101654	0.166009	0.90114	1	1	1	1	1	1	1	1	1	1	1	1	1	1	1	1	1	1	1	1	1	1	1	1	1	1	1	1	1	1	1	1	1	1	1	1	1	1	1
58	MEM49	0.214427	0.277486	0.445352	0.861677	0.395146	0.888378	0.549727	0.0299756	0.868598	1	1	1	1	1	1	1	1	1	1	1	1	1	1	1	1	1	1	1	1	1	1	1	1	1	1	1	1	1	1	1	1	1	1	1	1	1	1	1
59	MEM50	0.836028	0.649812	0.911219	0.560087	0.365357	0.0769205	0.729658	0.188355	0.206922	1	1	1	1	1	1	1	1	1	1	1	1	1	1	1	1	1	1	1	1	1	1	1	1	1	1	1	1	1	1	1	1	1	1	1	1	1	1	1
60	MEM51	0.635272	0.226033	0.608309	0.138538	0.711978	0.946577	0.572733	0.18826	0.933961	1	1	1	1	1	1	1	1	1	1	1	1	1	1	1	1	1	1	1	1	1	1	1	1	1	1	1	1	1	1	1	1	1	1	1	1	1	1	1
61	MEM52	0.675252	0.484967	0.733988	0.151557	0.106948	0.141209	0.689594	0.0515421	0.787566	1	1	1	1	1	1	1	1	1	1	1	1	1	1	1	1	1	1	1	1	1	1	1	1	1	1	1	1	1	1	1	1	1	1	1	1	1	1	1
62	MEM53	0.440604	0.111922	0.729459	0.193969	0.120021	0.415758	0.877919	0.691853	0.95187	1	1	1	1	1	1	1	1	1	1	1	1	1	1	1	1	1	1	1	1	1	1	1	1	1	1	1	1	1	1	1	1	1	1	1	1	1	1	1
63	MEM54	0.0328166	0.276422	0.940695	0.162151	0.422527	0.363468	0.667832	0.0550777	0.720054	1	1	1	1	1	1	1	1	1	1	1	1	1	1	1	1	1	1	1	1	1	1	1	1	1	1	1	1	1	1	1	1	1	1	1	1	1	1	1
64	MEM55	0.181758	0.643798	0.596387	0.498187	0.0164453	0.570859	0.694604	0.0049824	0.668568	1	1	1	1	1	1	1	1	1	1	1	1	1	1	1	1	1	1	1	1	1	1	1	1	1	1	1	1	1	1	1	1	1	1	1	1	1	1	1
65	MEM56	0.571349	0.68661	0.731744	0.787181	0.487042	0.987701	0.712533	0.0922766	0.0219198	1	1	1	1	1	1	1	1	1	1	1	1	1	1	1	1	1	1	1	1	1	1	1	1	1	1	1	1	1	1	1	1	1	1	1	1	1	1	1
66	MEM57	0.441849	0.772597	0.79913	0.241401	0.589377	0.322288	0.0447316	0.0429302	0.616681	1	1	1	1	1	1	1	1	1	1	1	1	1	1	1	1	1	1	1	1	1	1	1	1	1	1	1	1	1	1	1	1	1	1	1	1	1	1	1
67	MEM58	0.0516809	0.104337	0.996335	0.641817	0.946046	0.0588135	0.857555	0.954387	0.644467	1	1	1	1	1	1	1	1	1	1	1	1	1	1	1	1	1	1	1	1	1	1	1	1	1	1	1	1	1	1	1	1	1	1	1	1	1	1	1
68	MEM59	0.50961	0.302245	0.680877	0.420305	0.650379	0.389177	0.17109	0.632693	0.976642	1	1	1	1	1	1	1	1	1	1	1	1	1	1	1	1	1	1	1	1	1	1	1	1	1	1	1	1	1	1	1	1	1	1	1	1	1	1	1
69	MEM60	0.27454	0.952933	0.861937	0.964136	0.712518	0.895543	0.464936	0.622392	0.933183	1	1	1	1	1	1	1	1	1	1	1	1	1	1	1	1	1	1	1	1	1	1	1	1	1	1	1	1	1	1	1	1	1	1	1	1	1	1	1
70	MEM61	0.800109	0.563645	0.769938	0.603235	0.475191	0.930587	0.357436	0.193994	0.0905297	1	1	1	1	1	1	1	1	1	1	1	1	1	1	1	1	1	1	1	1	1	1	1	1	1	1	1	1	1	1	1	1	1	1	1	1	1	1	1
71	MEM62	0.049228	0.331903	0.826024	0.729296	0.0800726	0.766172	0.646271	0.956186	0.379521	1	1	1	1	1	1	1	1	1	1	1	1	1	1	1	1	1	1	1	1	1	1	1	1	1	1	1	1	1	1	1	1	1	1	1	1	1	1	1
72	MEM63	0.887797	0.160897	0.338648	0.851594	0.179033	0.400774	0.627834	0.171872	0.802436	1	1	1	1	1	1	1	1	1	1	1	1	1	1	1	1	1	1	1	1	1	1	1	1	1	1	1	1	1	1	1	1	1	1	1	1	1	1	1
73	MEM64	0.53198	0.11133	0.939777	0.38536	0.125021	0.48418	0.875774	0.682577	0.298667	1	1	1	1	1	1	1	1	1	1	1	1	1	1	1	1	1	1	1	1	1	1	1	1	1	1	1	1	1	1	1	1	1	1	1	1	1	1	1
74	MEM65	0.796846	0.931938	0.152852	0.0123023	0.171264	0.00850964	0.309376	0.000784556	0.939562	1	1	1	1	1	1	1	1	1	1	1	1	1	1	1	1	1	1	1	1	1	1	1	1	1	1	1	1	1	1	1	1	1	1	1	1	1	1	1
75	MEM66	0.181493	0.191051	0.982696	0.868459	0.150029	0.373458	0.947457	0.111618	0.647719	1	1	1	1	1	1	1	1	1	1	1	1	1	1	1	1	1	1	1	1	1	1	1	1	1	1	1	1	1	1	1	1	1	1	1	1	1	1	1
76	MEM67	0.77099	0.548048	0.854407	0.951497	0.863413	0.38699	0.264109	0.223252	0.315568	1	1	1	1	1	1	1	1	1	1	1	1	1	1	1	1	1	1	1	1	1	1	1	1	1	1	1	1	1	1	1	1	1	1	1	1	1	1	1
77	MEM68	0.0214585	0.273531	0.825229	0.540379	0.628304	0.848628	0.711422	0.657573	0.719427	1	1	1	1	1	1	1	1	1	1	1	1	1	1	1	1	1	1	1	1	1	1	1	1	1	1	1	1	1	1	1	1	1	1	1	1	1	1	1
78	MEM69	0.0822075	0.218648	0.895384	0.605794	0.850789	0.49514	0.674094	0.540532	0.630748	1	1	1	1	1	1	1	1	1	1	1	1	1	1	1	1	1	1	1	1	1	1	1	1	1	1	1	1	1	1	1	1	1	1	1	1	1	1	1
79	MEM70	0.38019	0.757489	0.72962	0.830589	0.562414	0.888992	0.0993986	0.649714	0.666667	1	1	1	1	1	1	1	1	1	1	1	1	1	1	1	1	1	1	1	1	1	1	1	1	1	1	1	1	1	1	1	1	1	1	1	1	1	1	1
80	MEM71	0.226943	0.833172	0.769498	0.994549	0.939765	0.622552	0.131781	0.752726	0.525806	1	1	1	1	1	1	1	1	1	1	1	1	1	1	1	1	1	1	1	1	1	1	1	1	1	1	1	1	1	1	1	1	1	1	1	1	1	1	1
81	MEM72	0.855114	0.288614	0.911398	0.682414	0.476726	0.117706	0.452406	0.254491	0.50828	1	1	1	1	1	1	1	1	1	1	1	1	1	1	1	1	1	1	1	1	1	1	1	1	1	1	1	1	1	1	1	1	1	1	1	1	1	1	1
82	MEM73	0.641882	0.548553	0.976339	0.704009	0.792276	0.321381	0.184001	0.635793	0.819527	1	1	1	1	1	1	1	1	1	1	1	1	1	1	1	1	1	1	1	1	1	1	1	1	1	1	1	1	1	1	1	1	1	1	1	1	1	1	1
83	MEM74	0.69983	0.505466	0.84369	0.891511	0.966821	0.515917	0.599904	0.574129	0.456915	1	1	1	1	1	1	1	1	1	1	1	1	1	1	1	1	1	1	1	1	1	1	1	1	1	1	1	1	1	1	1	1	1	1	1	1	1	1	1
84	MEM75	0.327153	0.793233	0.851682	0.922848	0.253931	0.63796	0.624786	0.29682	0.694937	1	1	1	1	1	1	1	1	1	1	1	1	1	1	1	1	1	1	1	1	1	1	1	1	1	1	1	1	1	1	1	1	1	1	1	1	1	1	1
85	MEM76	0.688332	0.916112	0.938301	0.571982	0.104687	0.307013	0.621222	0.520308	0.956368	1	1	1	1	1	1	1	1	1	1	1	1	1	1	1	1	1	1	1	1	1	1	1	1	1	1	1	1	1	1	1	1	1	1	1	1	1	1	1
86	MEM77	0.988358	0.302007	0.85841	0.63513	0.682861	0.760418	0.933489	0.14666	0.936979	1	1	1	1	1	1	1	1	1	1	1	1	1	1	1	1	1	1	1	1	1	1	1	1	1	1	1	1	1	1	1	1	1	1	1	1	1	1	1
87	MEM78	0.37081	0.604515	0.943621	0.89277	0.507467	0.0359341	0.996156	0.382129	0.0712135	1	1	1	1	1	1	1	1	1	1	1	1	1	1	1	1	1	1	1	1	1	1	1	1	1	1	1	1	1	1	1	1	1	1	1	1	1	1	1
88	MEM79	0.256442	0.963849	0.932511	0.783272	0.741096	0.874656	0.720119	0.414328	0.463085	1	1	1	1	1	1	1	1	1	1	1	1	1	1	1	1	1	1	1	1	1	1	1	1	1	1	1	1	1	1	1	1	1	1	1	1	1	1	1
89	MEM80	0.38669	0.628446	0.871784	0.924518	0.610611	0.0512038	0.775663	0.581022	0.802787	1	1	1	1	1	1	1	1	1	1	1	1	1	1	1	1	1	1	1	1	1	1	1	1	1	1	1	1	1	1	1	1	1	1	1	1	1	1	1
90	MEM81	0.501516	0.665486	0.83201	0.30913	0.386547	0.628723	0.349177	0.839729	0.596281	1	1	1	1	1	1	1	1	1	1	1	1	1	1	1	1	1	1	1	1	1	1	1	1	1	1	1	1	1	1	1	1	1	1	1	1	1	1	1
91	MEM82	0.462344	0.831585	0.86405	0.422466	0.615142	0.437852	0.758489	0.770358	0.714911	1	1	1	1	1	1	1	1	1	1	1	1	1	1	1	1	1	1	1	1	1	1	1	1	1	1	1	1	1	1	1	1	1	1	1	1	1	1	1
92	MEM83	0.427517	0.484931	0.958658	0.197845	0.932285	0.450513	0.238318	0.350364	0.975448	1	1	1	1	1	1	1	1	1	1	1	1	1	1	1	1	1	1	1	1	1	1	1	1	1	1	1	1	1	1	1	1	1	1	1	1	1	1	1
93	MEM84	0.557478	0.295498	0.893704	0.756421	0.538949	0.56042	0.734176	0.573939	0.0206619	1	1	1	1	1	1	1	1	1	1	1	1	1	1	1	1	1	1	1	1	1	1	1	1	1	1	1	1	1	1	1	1	1	1	1	1	1	1	1
94	MEM85	0.716009	0.52519	0.91828	0.051259	0.927508	0.156985	0.261062	0.0529298	0.922331	1	1	1	1	1	1	1	1	1	1	1	1	1	1	1	1	1	1	1	1	1	1	1	1	1	1	1	1	1	1	1	1	1	1	1	1	1	1	1
95	MEM86	0.996901	0.923302	0.668065	0.823647	0.0571332	0.419843	0.258257	0.706783	0.897376	1	1	1	1	1	1	1	1	1	1	1	1	1	1	1	1	1	1	1	1	1	1	1	1	1	1	1	1	1	1	1	1	1	1	1	1	1	1	1
96	MEM87	0.631544	0.377744	0.919223	0.0171495	0.874801	0.889697	0.688039	0.894503	0.300316	1	1	1	1	1	1	1	1	1	1	1	1	1	1	1	1	1	1	1	1	1	1	1	1	1	1	1	1	1	1	1	1	1	1	1	1	1	1	1
97	MEM88	0.972504	0.307079	0.762108	0.574697	0.817459	0.520749	0.795919	0.695617	0.667046	1	1	1	1	1	1	1	1	1	1	1	1	1	1	1	1	1	1	1	1	1	1	1	1	1	1	1	1	1	1	1	1	1	1	1	1	1	1	1
98	MEM89	0.545644	0.215231	0.977397	0.495194	0.874801	0.676319	0.788474	0.608327	0.718362	1	1	1	1	1	1	1	1	1	1	1	1	1	1	1	1	1	1	1	1	1	1	1	1	1	1	1	1	1	1	1	1	1	1	1	1	1	1	1
99	MEM90	0.149958	0.904395	0.933124	0.136052	0.373121	0.948787	0.426226	0.416795	0.814819	1	1	1	1	1	1	1	1	1	1	1	1	1	1	1	1	1	1	1	1	1	1	1	1	1	1	1	1	1	1	1	1	1	1	1	1	1	1	1
100	MEM91	0.42633	0.725179	0.860801	0.428751	0.723412	0.775838	0.454717	0.49421	0.643283	1	1	1	1	1	1	1	1	1	1	1	1	1	1	1	1	1	1	1	1	1	1	1	1	1	1	1	1	1	1	1	1	1	1	1	1	1	1	1
101	MEM92	0.631515	0.318137	0.940735	0.1093	0.0947207	0.239974	0.309172	0.86673	0.785707	1	1	1	1	1	1	1	1	1	1	1	1	1	1	1	1	1	1	1	1	1	1	1	1	1	1	1	1	1	1	1	1	1	1	1	1	1	1	1
102	MEM93	0.650434	0.839663	0.99181	0.179934	0.545578	0.181094	0.0804975	0.862235	0.973696	1	1	1	1	1	1	1	1	1	1	1	1	1	1	1	1	1	1	1	1	1	1	1	1	1	1	1	1	1	1	1	1	1	1	1	1	1	1	1
103	MEM94	0.895447	0.658679	0.978146	0.498682	0.695804	0.775188	0.844383	0.956298	0.634409	1	1	1	1	1	1	1	1	1	1	1	1	1	1	1	1	1	1	1	1	1	1	1	1	1	1	1	1	1	1	1	1	1	1	1	1	1	1	1
104	MEM95	0.290196	0.637728	0.79937	0.816929	0.636153	0.894414	0.945643	0.455419	0.785093	1	1	1	1	1	1	1	1	1	1	1	1	1	1	1	1	1	1	1	1	1	1	1	1	1	1	1	1	1	1	1	1	1	1	1	1	1	1	1
105	MEM96	0.966943	0.71211	0.74006	0.775062	0.701427	0.45309	0.990272	0.958251	0.567348	1	1	1	1	1	1	1	1	1	1	1	1	1	1	1	1	1	1	1	1	1	1	1	1	1	1	1	1	1	1	1	1	1	1	1	1	1	1	1
106	MEM97	0.243356	0.900817	0.840294	0.417734	0.33323	0.596026	0.603179	0.387758	0.267584	1	1	1	1	1	1	1	1	1	1	1	1	1	1	1	1	1	1	1	1	1	1	1	1	1	1	1	1	1	1	1	1	1	1	1	1	1	1	1
107	MEM98	0.469686	0.713355	0.865372	0.838406	0.971178	0.37027	0.428217	0.993335	0.47203	1	1	1	1	1	1	1	1	1	1	1	1	1	1	1	1	1	1	1	1	1	1	1	1	1	1	1	1	1	1	1	1	1	1	1	1	1	1	1
108	MEM99	0.827372	0.772494	0.956779	0.85622	0.316802	0.947242	0.955031	0.637692	0.917759	1	1	1	1	1	1	1	1	1	1	1	1	1	1	1	1	1	1	1	1	1	1	1	1	1	1	1	1	1	1	1	1	1	1	1	1	1	1	1
109	MEM100	0.599804	0.693333	0.717569	0.590759	0.797611	0.995249	0.407516	0.17806	0.405098	1	1	1	1	1	1	1	1	1	1	1	1	1	1	1	1	1	1	1	1	1	1	1	1	1	1	1	1	1	1	1	1	1	1	1	1	1	1	1
110	MEM101	0.594987	0.921861	0.825604	0.40971	0.90981	0.552825	0.60621	0.916738	0.537054	1	1	1	1	1	1	1	1	1	1	1	1	1	1	1	1	1	1	1	1	1	1	1	1	1	1	1	1	1	1	1	1	1	1	1	1	1	1	1
111	MEM102	0.835922	0.295605	0.991725	0.573	0.899754	0.769652	0.693323	0.731663	0.672799	1	1	1	1	1	1	1	1	1	1	1	1	1	1	1	1	1	1	1	1	1	1	1	1	1	1	1	1	1	1	1	1	1	1	1	1	1	1	1
112	MEM103	0.639652	0.323413	0.998623	0.266933	0.817491	0.521701	0.95053	0.502213	0.628123	1	1	1	1	1	1	1	1	1	1	1	1	1	1	1	1	1	1	1	1	1	1	1	1	1	1	1	1	1	1	1	1	1	1	1	1	1	1	1
113	MEM104	0.173582	0.942026	0.783046	0.907896	0.845939	0.976874	0.922214	0.949243	0.998748	1	1	1	1	1	1	1	1	1	1	1	1	1	1	1	1	1	1	1	1	1	1	1	1	1	1	1	1	1	1	1	1	1	1	1	1	1	1	1
114	MEM105	0.850875	0.537017	0.998381	0.31052	0.446417	0.764271	0.697616	0.0876582	0.930319	1	1	1	1	1	1	1	1	1	1	1	1	1	1	1	1	1	1	1	1	1	1	1	1	1	1	1	1	1	1	1	1	1	1	1	1	1	1	1
115	MEM106	0.57497	0.836622	0.884625	0.241026	0.805541	0.912797	0.621408	0.447327	0.827926	1	1	1	1	1	1	1	1	1	1	1	1	1	1	1	1	1	1	1	1	1	1	1	1	1	1	1	1	1	1	1	1	1	1	1	1	1	1	1
116	MEM107	0.275928	0.696101	0.694568	0.246912	0.377692	0.282969	0.749149	0.313129	0.875857	1	1	1	1	1	1	1	1	1	1	1	1	1	1	1	1	1	1	1	1	1	1	1	1	1	1	1	1	1	1	1	1	1	1	1	1	1	1	1
117	MEM108	0.539717	0.9072	0.966825	0.463665	0.774048	0.706179	0.410604	0.819394	0.873009	1	1	1	1	1	1	1	1	1	1	1	1	1	1	1	1	1	1	1	1	1	1	1	1	1	1	1	1	1	1	1	1	1	1	1	1	1	1	1
118	MEM109	0.853763	0.953743	0.741762	0.0867792	0.567024	0.977007	0.732434	0.856	0.94266	1	1	1	1	1	1	1	1	1	1	1	1	1	1	1	1	1	1	1	1	1	1	1	1	1	1	1	1	1	1	1	1	1	1	1	1	1	1	1
119	MEM110	0.617476	0.744184	0.94135	0.395254	0.941121	0.746836	0.62953	0.262722	0.641794	1	1	1	1	1	1	1	1	1	1	1	1	1	1	1	1	1	1	1	1	1	1	1	1	1	1	1	1	1	1	1	1	1	1	1	1	1	1	1
120	MEM111	0.423031	0.378085	0.927232	0.56226	0.311035	0.771807	0.789571	0.646873	0.828759	1	1	1	1	1	1	1	1	1	1	1	1	1	1	1	1	1	1	1	1	1	1	1	1	1	1	1	1	1	1	1	1	1	1	1	1	1	1	1
121	MEM112	0.979211	0.824558	0.931041	0.693152	0.845551	0.767212	0.637266	0.770023	0.939702	1	1	1	1	1	1	1	1	1	1	1	1	1	1	1	1	1	1	1	1	1	1	1	1	1	1	1	1	1	1	1	1	1	1	1	1	1	1	1
122	MEM113	0.754678	0.966391	0.606093	0.426867	0.581113	0.70305	0.414425	0.792623	0.61691	1	1	1	1	1	1	1	1	1	1	1	1	1	1	1	1	1	1	1	1	1	1	1	1	1	1	1	1	1	1	1	1	1	1	1	1	1	1	1
123	MEM114	0.639163	0.590983	0.858682	0.321851	0.898374	0.457852	0.93398	0.973611	0.856022	1	1	1	1	1	1	1	1	1	1	1	1	1	1	1	1	1	1	1	1	1	1	1	1	1	1	1	1	1	1	1	1	1	1	1	1	1	1	1
124	MEM115	0.520875	0.182185	0.580296	0.432137	0.372509	0.0982723	0.444221	0.681144	0.845583	1	1	1	1	1	1	1	1	1	1	1	1	1	1	1	1	1	1	1	1	1	1	1	1	1	1	1	1	1	1	1	1	1	1	1	1	1	1	1
125	MEM116	0.83311	0.278557	0.895837	0.460602	0.62986	0.596156	0.890139	0.7214	0.714367	1	1	1	1	1	1	1	1	1	1	1	1	1	1	1	1	1	1	1	1	1	1	1	1	1	1	1	1	1	1	1	1	1	1	1	1	1	1	1
126	MEM117	0.56051	0.536147	0.889754	0.548165	0.854929	0.750654	0.968116	0.464247	0.949394	1	1	1	1	1	1	1	1	1	1	1	1	1	1	1	1	1	1	1	1	1	1	1	1	1	1	1	1	1	1	1	1	1	1	1	1	1	1	1
127	MEM118	0.921942	0.0912459	0.989341	0.122667	0.785216	0.313098	0.251095	0.746646	0.164088	1	1	1	1	1	1	1	1	1	1	1	1	1	1	1	1	1	1	1	1	1	1	1	1	1	1	1	1	1	1	1	1	1	1	1	1	1	1	1
128	MEM119	0.474597	0.564124	0.944953	0.578968	0.415979	0.281926	0.359874	0.871617	0.936321	1	1	1	1	1	1	1	1	1	1	1	1	1	1	1	1	1	1	1	1	1	1	1	1	1	1	1	1	1	1	1	1	1	1	1	1	1	1	1
129	MEM120	0.842118	0.517005	0.92979	0.520542	0.511842	0.841092	0.838881	0.240958	0.924186	1	1	1	1	1	1	1	1	1	1	1	1	1	1	1	1	1	1	1	1	1	1	1	1	1	1	1	1	1	1	1	1	1	1	1	1	1	1	1
130	MEM121	0.474519	0.651703	0.641044	0.714226	0.39771	0.768398	0.590427	0.0315624	0.673172	1	1	1	1	1	1	1	1	1	1	1	1	1	1	1	1	1	1	1	1	1	1	1	1	1	1	1	1	1	1	1	1	1	1	1	1	1	1	1
131	MEM122	0.535395	0.0381825	0.750905	0.845382	0.984411	0.782455	0.115761	0.502076	0.925907	1	1	1	1	1	1	1	1	1	1	1	1	1	1	1	1	1	1	1	1	1	1	1	1	1	1	1	1	1	1	1	1	1	1	1	1	1	1	1
132	MEM123	0.615483	0.419993	0.9677	0.860255	0.930817	0.779688	0.161643	0.766648	0.638245	1	1	1	1	1	1	1	1	1	1	1	1	1	1	1	1	1	1	1	1	1	1	1	1	1	1	1	1	1	1	1	1	1	1	1	1	1	1	1
133	MEM124	0.210594	0.347084	0.969918	0.879327	0.75732	0.914356	0.403882	0.680238	0.767985	1	1	1	1	1	1	1	1	1	1	1	1	1	1	1	1	1	1	1	1	1	1	1	1	1	1	1	1	1	1	1	1	1	1	1	1	1	1	1
134	MEM125	0.60241	0.310143	0.856843	0.568208	0.733216	0.581496	0.899418	0.966688	0.788466	1	1	1	1	1	1	1	1	1	1	1	1	1	1	1	1	1	1	1	1	1	1	1	1	1	1	1	1	1	1	1	1	1	1	1	1	1	1	1
135	MEM126	0.662238	0.842602	0.854461	0.923417	0.455651	0.444626	0.632961	0.524457	0.649768	1	1	1	1	1	1	1	1	1	1	1	1	1	1	1	1	1	1	1	1	1	1	1	1	1	1	1	1	1	1	1	1	1	1	1	1	1	1	1
136	MEM127	0.538714	0.745621	0.999701	0.723581	0.998728	0.999102	0.997268	0.986206	0.998317	1	1	1	1	1	1	1	1	1	1	1	1	1	1	1	1	1	1	1	1	1	1	1	1	1	1	1	1	1	1	1	1	1	1	1	1	1	1	1
137	MEM128	0.59726	0.197317	0.892285	0.990938	0.296559	0.668929	0.743551	0.424255	0.897859	1	1	1	1	1	1	1	1	1	1	1	1	1	1	1	1	1	1	1	1	1	1	1	1	1	1	1	1	1	1	1	1	1	1	1	1	1	1	1
138	MEM129	0.939751	0.019538	0.982703	0.357822	0.779598	0.588931	0.780217	0.237458	0.841014	1	1	1	1	1	1	1	1	1	1	1	1	1	1	1	1	1	1	1	1	1	1	1	1	1	1	1	1	1	1	1	1	1	1	1	1	1	1	1
139	MEM130	0.456319	0.718253	0.861423	0.379958	0.999394	0.317029	0.581304	0.88771	0.733397	1	1	1	1	1	1	1	1	1	1	1	1	1	1	1	1	1	1	1	1	1	1	1	1	1	1	1	1	1	1	1	1	1	1	1	1	1	1	1
140	MEM131	0.487584	0.56288	0.835866	0.612987	0.0705602	0.458692	0.501343	0.725563	0.765704	1	1	1	1	1	1	1	1	1	1	1	1	1	1	1	1	1	1	1	1	1	1	1	1	1	1	1	1	1	1	1	1	1	1	1	1	1	1	1
141	MEM132	0.622675	0.863966	0.846557	0.295744	0.987978	0.849249	0.499104	0.237952	0.731186	1	1	1	1	1	1	1	1	1	1	1	1	1	1	1	1	1	1	1	1	1	1	1	1	1	1	1	1	1	1	1	1	1	1	1	1	1	1	1
142	MEM133	0.805988	0.655771	0.86113	0.830321	0.167944	0.908757	0.695581	0.077998	0.872769	1	1	1	1	1	1	1	1	1	1	1	1	1	1	1	1	1	1	1	1	1	1	1	1	1	1	1	1	1	1	1	1	1	1	1	1	1	1	1
143	MEM134	0.918218	0.826715	0.972842	0.922715	0.267707	0.915695	0.509816	0.7421	0.972601	1	1	1	1	1	1	1	1	1	1	1	1	1	1	1	1	1	1	1	1	1	1	1	1	1	1	1	1	1	1	1	1	1	1	1	1	1	1	1
144	MEM135	0.552293	0.265093	0.95136	0.775668	0.647006	0.739719	0.778175	0.844165	0.758807	1	1	1	1	1	1	1	1	1	1	1	1	1	1	1	1	1	1	1	1	1	1	1	1	1	1	1	1	1	1	1	1	1	1	1	1	1	1	1
145	MEM136	0.869706	0.847483	0.809892	0.414649	0.0373114	0.786571	0.825027	0.998379	0.607986	1	1	1	1	1	1	1	1	1	1	1	1	1	1	1	1	1	1	1	1	1	1	1	1	1	1	1	1	1	1	1	1	1	1	1	1	1	1	1
146	MEM137	0.750032	0.770993	0.878235	0.826091	0.796331	0.639745	0.177138	0.751613	0.558367	1	1	1	1	1	1	1	1	1	1	1	1	1	1	1	1	1	1	1	1	1	1	1	1	1	1	1	1	1	1	1	1	1	1	1	1	1	1	1
147	MEM138	0.889883	0.917155	0.876726	0.60266	0.502847	0.910219	0.528873	0.98559	0.920728	1	1	1	1	1	1	1	1	1	1	1	1	1	1	1	1	1	1	1	1	1	1	1	1	1	1	1	1	1	1	1	1	1	1	1	1	1	1	1
148	MEM139	0.585374	0.373287	0.785491	0.579735	0.166029	0.601486	0.611061	0.541262	0.295023	1	1	1	1	1	1	1	1	1	1	1	1	1	1	1	1	1	1	1	1	1	1	1	1	1	1	1	1	1	1	1	1	1	1	1	1	1	1	1
149	MEM140	0.369908	0.603203	0.95244	0.888355	0.399274	0.774141	0.397873	0.757586	0.665888	1	1	1	1	1	1	1	1	1	1	1	1	1	1	1	1	1	1	1	1	1	1	1	1	1	1	1	1	1	1	1	1	1	1	1	1	1	1	1
150	MEM141	0.999342	0.521969	0.821925	0.814046	0.441696	0.527294	0.708725	0.583897	0.544174	1	1	1	1	1	1	1	1	1	1	1	1	1	1	1	1	1	1	1	1	1	1	1	1	1	1	1	1	1	1	1	1	1	1	1	1	1	1	1
151	MEM142	0.990371	0.764972	0.412474	0.671224	0.365395	0.507098	0.665499	0.772291	0.844833	1	1	1	1	1	1	1	1	1	1	1	1	1	1	1	1	1	1	1	1	1	1	1	1	1	1	1	1	1	1	1	1	1	1	1	1	1	1	1
152	MEM143	0.737997	0.765186	0.702764	0.879979	0.914533	0.959085	0.851011	0.850649	0.742008	1	1	1	1	1	1	1	1	1	1	1	1	1	1	1	1	1	1	1	1	1	1	1	1	1	1	1	1	1	1	1	1	1	1	1	1	1	1	1
153	MEM144	0.463762	0.495058	0.719308	0.226097	0.881777	0.937931	0.677269	0.941704	0.991044	1	1	1	1	1	1	1	1	1	1	1	1	1	1	1	1	1	1	1	1	1	1	1	1	1	1	1	1	1	1	1	1	1	1	1	1	1	1	1
154	MEM145	0.799749	0.861531	0.803694	0.823781	0.478775	0.604428	0.868784	0.947205	0.930759	1	1	1	1	1	1	1	1	1	1	1	1	1	1	1	1	1	1	1	1	1	1	1	1	1	1	1	1	1	1	1	1	1	1	1	1	1	1	1
155	MEM146	0.728125	0.796027	0.928415	0.29178	0.441858	0.791092	0.880314	0.853051	0.611018	1	1	1	1	1	1	1	1	1	1	1	1	1	1	1	1	1	1	1	1	1	1	1	1	1	1	1	1	1	1	1	1	1	1	1	1	1	1	1
156	MEM147	0.5811	0.25101	0.778308	0.464016	0.390199	0.927227	0.549042	0.628262	0.978211	1	1	1	1	1	1	1	1	1	1	1	1	1	1	1	1	1	1	1	1	1	1	1	1	1	1	1	1	1	1	1	1	1	1	1	1	1	1	1
157	MEM148	0.675355	0.770711	0.979653	0.99684	0.7136	0.893646	0.827216	0.863202	0.715261	1	1	1	1	1	1	1	1	1	1	1	1	1	1	1	1	1	1	1	1	1	1	1	1	1	1	1	1	1	1	1	1	1	1	1	1	1	1	1
158	MEM149	0.297977	0.0963096	0.816556	0.468293	0.290126	0.610146	0.713365	0.541046	0.765709	1	1	1	1	1	1	1	1	1	1	1	1	1	1	1	1	1	1	1	1	1	1	1	1	1	1	1	1	1	1	1	1	1	1	1	1	1	1	1
159	MEM150	0.857218	0.537461	0.803055	0.515043	0.935497	0.791898	0.889627	0.402013	0.949062	1	1	1	1	1	1	1	1	1	1	1	1	1	1	1	1	1	1	1	1	1	1	1	1	1	1	1	1	1	1	1	1	1	1	1	1	1	1	1
160	MEM151	0.881869	0.698736	0.878997	0.963498	0.738733	0.553254	0.447102	0.807383	0.636954	1	1	1	1	1	1	1	1	1	1	1	1	1	1	1	1	1	1	1	1	1	1	1	1	1	1	1	1	1	1	1	1	1	1	1	1	1	1	1
161	MEM152	0.620701	0.895605	0.902492	0.610425	0.52434	0.44916	0.926834	0.7361	0.56435	1	1	1	1	1	1	1	1	1	1	1	1	1	1	1	1	1	1	1	1	1	1	1	1	1	1	1	1	1	1	1	1	1	1	1	1	1	1	1
162	MEM153	0.118075	0.0676607	0.921844	0.592372	0.502621	0.462258	0.730599	0.699389	0.808822	1	1	1	1	1	1	1	1	1	1	1	1	1	1	1	1	1	1	1	1	1	1	1	1	1	1	1	1	1	1	1	1	1	1	1	1	1	1	1
163	MEM154	0.789048	0.725233	0.882714	0.529139	0.171958	0.918058	0.413851	0.714152	0.840271	1	1	1	1	1	1	1	1	1	1	1	1	1	1	1	1	1	1	1	1	1	1	1	1	1	1	1	1	1	1	1	1	1	1	1	1	1	1	1
164	MEM155	0.937702	0.635457	0.0815058	0.970332	0.837461	0.931622	0.711253	0.507037	0.802624	1	1	1	1	1	1	1	1	1	1	1	1	1	1	1	1	1	1	1	1	1	1	1	1	1	1	1	1	1	1	1	1	1	1	1	1	1	1	1
165	MEM156	0.723431	0.703397	0.56349	0.676998	0.751432	0.279521	0.925418	0.878225	0.829679	1	1	1	1	1	1	1	1	1	1	1	1	1	1	1	1	1	1	1	1	1	1	1	1	1	1	1	1	1	1	1	1	1	1	1	1	1	1	1
166	MEM157	0.882264	0.676065	0.529517	0.948004	0.85848	0.878935	0.998146	0.302288	0.911461	1	1	1	1	1	1	1	1	1	1	1	1	1	1	1	1	1	1	1	1	1	1	1	1	1	1	1	1	1	1	1	1	1	1	1	1	1	1	1
167	MEM158	0.832644	0.81564	0.927146	0.524337	0.811219	0.416033	0.747315	0.880352	0.870928	1	1	1	1	1	1	1	1	1	1	1	1	1	1	1	1	1	1	1	1	1	1	1	1	1	1	1	1	1	1	1	1	1	1	1	1	1	1	1
168	MEM159	0.60187	0.295377	0.991878	0.973844	0.876206	0.86129	0.565992	0.82348	0.556392	1	1	1	1	1	1	1	1	1	1	1	1	1	1	1	1	1	1	1	1	1	1	1	1	1	1	1	1	1	1	1	1	1	1	1	1	1	1	1
169	MEM160	0.891714	0.562894	0.901212	0.344297	0.995183	0.930139	0.913515	0.81151	0.777338	1	1	1	1	1	1	1	1	1	1	1	1	1	1	1	1	1	1	1	1	1	1	1	1	1	1	1	1	1	1	1	1	1	1	1	1	1	1	1
170	MEM161	0.635268	0.26187	0.948056	0.452392	0.577562	0.633838	0.782834	0.341986	0.340171	1	1	1	1	1	1	1	1	1	1	1	1	1	1	1	1	1	1	1	1	1	1	1	1	1	1	1	1	1	1	1	1	1	1	1	1	1	1	1
171	MEM162	0.521272	0.309881	0.827133	0.707615	0.699056	0.950022	0.970044	0.92909	0.718264	1	1	1	1	1	1	1	1	1	1	1	1	1	1	1	1	1	1	1	1	1	1	1	1	1	1	1	1	1	1	1	1	1	1	1	1	1	1	1
172	MEM163	0.810566	0.145801	0.846139	0.734657	0.743803	0.786999	0.986715	0.677118	0.990522	1	1	1	1	1	1	1	1	1	1	1	1	1	1	1	1	1	1	1	1	1	1	1	1	1	1	1	1	1	1	1	1	1	1	1	1	1	1	1
173	MEM164	0.89675	0.920393	0.914032	0.506556	0.154652	0.238566	0.254164	0.81507	0.562655	1	1	1	1	1	1	1	1	1	1	1	1	1	1	1	1	1	1	1	1	1	1	1	1	1	1	1	1	1	1	1	1	1	1	1	1	1	1	1
174	MEM165	0.787323	0.591041	0.997583	0.763755	0.190737	0.736745	0.787932	0.385256	0.529169	1	1	1	1	1	1	1	1	1	1	1	1	1	1	1	1	1	1	1	1	1	1	1	1	1	1	1	1	1	1	1	1	1	1	1	1	1	1	1
175	MEM166	0.658211	0.807937	0.961236	0.372798	0.72308	0.654752	0.899239	0.291738	0.821116	1	1	1	1	1	1	1	1	1	1	1	1	1	1	1	1	1	1	1	1	1	1	1	1	1	1	1	1	1	1	1	1	1	1	1	1	1	1	1
176	MEM167	0.83706	0.524227	0.988778	0.614751	0.663117	0.984358	0.574808	0.645492	0.918123	1	1	1	1	1	1	1	1	1	1	1	1	1	1	1	1	1	1	1	1	1	1	1	1	1	1	1	1	1	1	1	1	1	1	1	1	1	1	1
177	MEM168	0.993989	0.35785	0.835207	0.914809	0.792917	0.712233	0.618495	0.838706	0.289049	1	1	1	1	1	1	1	1	1	1	1	1	1	1	1	1	1	1	1	1	1	1	1	1	1	1	1	1	1	1	1	1	1	1	1	1	1	1	1
178	MEM169	0.927671	0.710423	0.855072	0.336909	0.286704	0.36956	0.818211	0.617939	0.120033	1	1	1	1	1	1	1	1	1	1	1	1	1	1	1	1	1	1	1	1	1	1	1	1	1	1	1	1	1	1	1	1	1	1	1	1	1	1	1
179	MEM170	0.837769	0.345723	0.951678	0.559679	0.193273	0.715289	0.611277	0.956205	0.966683	1	1	1	1	1	1	1	1	1	1	1	1	1	1	1	1	1	1	1	1	1	1	1	1	1	1	1	1	1	1	1	1	1	1	1	1	1	1	1
180	MEM171	0.994994	0.207114	0.926881	0.488557	0.397866	0.699742	0.788391	0.754907	0.398237	1	1	1	1	1	1	1	1	1	1	1	1	1	1	1	1	1	1	1	1	1	1	1	1	1	1	1	1	1	1	1	1	1	1	1	1	1	1	1
181	MEM172	0.498341	0.826763	0.915333	0.972099	0.188134	0.275855	0.120316	0.302231	0.381099	1	1	1	1	1	1	1	1	1	1	1	1	1	1	1	1	1	1	1	1	1	1	1	1	1	1	1	1	1	1	1	1	1	1	1	1	1	1	1
182	MEM173	0.819715	0.602569	0.752235	0.943839	0.875888	0.959194	0.573377	0.834813	0.42736	1	1	1	1	1	1	1	1	1	1	1	1	1	1	1	1	1	1	1	1	1	1	1	1	1	1	1	1	1	1	1	1	1	1	1	1	1	1	1
183	MEM174	0.975633	0.694619	0.916885	0.362062	0.355898	0.908568	0.375199	0.00597728	0.844757	1	1	1	1	1	1	1	1	1	1	1	1	1	1	1	1	1	1	1	1	1	1	1	1	1	1	1	1	1	1	1	1	1	1	1	1	1	1	1
184	MEM175	0.882119	0.923527	0.688001	0.99616	0.801868	0.684597	0.827037	0.393649	0.794641	1	1	1	1	1	1	1	1	1	1	1	1	1	1	1	1	1	1	1	1	1	1	1	1	1	1	1	1	1	1	1	1	1	1	1	1	1	1	1
185	MEM176	0.687056	0.898818	0.771914	0.401876	0.471933	0.952296	0.687111	0.590441	0.949527	1	1	1	1	1	1	1	1	1	1	1	1	1	1	1	1	1	1	1	1	1	1	1	1	1	1	1	1	1	1	1	1	1	1	1	1	1	1	1
186	MEM177	0.627378	0.891271	0.984282	0.89234	0.662121	0.836056	0.421092	0.579019	0.967249	1	1	1	1	1	1	1	1	1	1	1	1	1	1	1	1	1	1	1	1	1	1	1	1	1	1	1	1	1	1	1	1	1	1	1	1	1	1	1
187	MEM178	0.694802	0.812948	0.861883	0.510001	0.589475	0.731138	0.688676	0.737775	0.101578	1	1	1	1	1	1	1	1	1	1	1	1	1	1	1	1	1	1	1	1	1	1	1	1	1	1	1	1	1	1	1	1	1	1	1	1	1	1	1
188	MEM179	0.922752	0.216813	0.846171	0.910711	0.899834	0.851289	0.461234	0.212176	0.916271	1	1	1	1	1	1	1	1	1	1	1	1	1	1	1	1	1	1	1	1	1	1	1	1	1	1	1	1	1	1	1	1	1	1	1	1	1	1	1
189	MEM180	0.929823	0.741909	0.932064	0.308715	0.0789218	0.672156	0.994278	0.826026	0.33632	1	1	1	1	1	1	1	1	1	1	1	1	1	1	1	1	1	1	1	1	1	1	1	1	1	1	1	1	1	1	1	1	1	1	1	1	1	1	1
190	MEM181	0.897422	0.105729	0.908977	0.517535	0.226726	0.529475	0.983695	0.925425	0.939729	1	1	1	1	1	1	1	1	1	1	1	1	1	1	1	1	1	1	1	1	1	1	1	1	1	1	1	1	1	1	1	1	1	1	1	1	1	1	1
191	MEM182	0.605755	0.573265	0.907064	0.549691	0.376778	0.84351	0.790309	0.655082	0.713501	1	1	1	1	1	1	1	1	1	1	1	1	1	1	1	1	1	1	1	1	1	1	1	1	1	1	1	1	1	1	1	1	1	1	1	1	1	1	1
192	MEM183	0.763747	0.840019	0.937452	0.717373	0.970758	0.28332	0.873136	0.812124	0.631435	1	1	1	1	1	1	1	1	1	1	1	1	1	1	1	1	1	1	1	1	1	1	1	1	1	1	1	1	1	1	1	1	1	1	1	1	1	1	1
193	MEM184	0.917924	0.474631	0.843005	0.811695	0.167131	0.567207	0.361175	0.892445	0.965223	1	1	1	1	1	1	1	1	1	1	1	1	1	1	1	1	1	1	1	1	1	1	1	1	1	1	1	1	1	1	1	1	1	1	1	1	1	1	1
194	MEM185	0.879574	0.74553	0.884972	0.787789	0.214994	0.44043	0.716695	0.939658	0.928409	1	1	1	1	1	1	1	1	1	1	1	1	1	1	1	1	1	1	1	1	1	1	1	1	1	1	1	1	1	1	1	1	1	1	1	1	1	1	1
195	MEM186	0.904661	0.684874	0.953874	0.634981	0.592975	0.267087	0.648201	0.780128	0.979609	1	1	1	1	1	1	1	1	1	1	1	1	1	1	1	1	1	1	1	1	1	1	1	1	1	1	1	1	1	1	1	1	1	1	1	1	1	1	1
196	MEM187	0.432924	0.778502	0.760895	0.430517	0.173542	0.637845	0.830101	0.651812	0.843965	1	1	1	1	1	1	1	1	1	1	1	1	1	1	1	1	1	1	1	1	1	1	1	1	1	1	1	1	1	1	1	1	1	1	1	1	1	1	1
197	MEM188	0.925331	0.383923	0.899873	0.831201	0.917349	0.979815	0.382098	0.532453	0.490265	1	1	1	1	1	1	1	1	1	1	1	1	1	1	1	1	1	1	1	1	1	1	1	1	1	1	1	1	1	1	1	1	1	1	1	1	1	1	1
198	MEM189	0.620017	0.469112	0.875399	0.872705	0.9479	0.55616	0.640029	0.297817	0.640016	1	1	1	1	1	1	1	1	1	1	1	1	1	1	1	1	1	1	1	1	1	1	1	1	1	1	1	1	1	1	1	1	1	1	1	1	1	1	1
199	MEM190	0.751556	0.729675	0.834207	0.445	0.958465	0.501355	0.5657	0.240947	0.147787	1	1	1	1	1	1	1	1	1	1	1	1	1	1	1	1	1	1	1	1	1	1	1	1	1	1	1	1	1	1	1	1	1	1	1	1	1	1	1
200	MEM191	0.889509	0.720163	0.991528	0.410703	0.400049	0.71026	0.999272	0.527312	0.313078	1	1	1	1	1	1	1	1	1	1	1	1	1	1	1	1	1	1	1	1	1	1	1	1	1	1	1	1	1	1	1	1	1	1	1	1	1	1	1
201	MEM192	0.977854	0.708993	0.542215	0.6563	0.399454	0.744959	0.658249	0.197275	0.961451	1	1	1	1	1	1	1	1	1	1	1	1	1	1	1	1	1	1	1	1	1	1	1	1	1	1	1	1	1	1	1	1	1	1	1	1	1	1	1
202	MEM193	0.759013	0.980736	0.99778	0.794158	0.989574	0.731915	0.93863	0.932713	0.922861	1	1	1	1	1	1	1	1	1	1	1	1	1	1	1	1	1	1	1	1	1	1	1	1	1	1	1	1	1	1	1	1	1	1	1	1	1	1	1
203	MEM194	0.944438	0.804916	0.356604	0.514214	0.779416	0.839959	0.997717	0.0878701	0.894885	1	1	1	1	1	1	1	1	1	1	1	1	1	1	1	1	1	1	1	1	1	1	1	1	1	1	1	1	1	1	1	1	1	1	1	1	1	1	1
204	MEM195	0.973388	0.868761	0.960557	0.368279	0.570189	0.608557	0.902053	0.886017	0.687552	1	1	1	1	1	1	1	1	1	1	1	1	1	1	1	1	1	1	1	1	1	1	1	1	1	1	1	1	1	1	1	1	1	1	1	1	1	1	1
205	MEM196	0.550026	0.975985	0.915527	0.404651	0.885304	0.956921	0.749241	0.87523	0.476179	1	1	1	1	1	1	1	1	1	1	1	1	1	1	1	1	1	1	1	1	1	1	1	1	1	1	1	1	1	1	1	1	1	1	1	1	1	1	1
206	MEM197	0.840551	0.865977	0.76843	0.452351	0.725905	0.420147	0.792474	0.926642	0.976086	1	1	1	1	1	1	1	1	1	1	1	1	1	1	1	1	1	1	1	1	1	1	1	1	1	1	1	1	1	1	1	1	1	1	1	1	1	1	1
207	MEM198	0.969325	0.692375	0.996699	0.987672	0.95562	0.18134	0.754807	0.985993	0.460936	1	1	1	1	1	1	1	1	1	1	1	1	1	1	1	1	1	1	1	1	1	1	1	1	1	1	1	1	1	1	1	1	1	1	1	1	1	1	1
208	MEM199	0.807708	0.0493328	0.959729	0.940059	0.681548	0.509645	0.726404	0.712046	0.788075	1	1	1	1	1	1	1	1	1	1	1	1	1	1	1	1	1	1	1	1	1	1	1	1	1	1	1	1	1	1	1	1	1	1	1	1	1	1	1
209	MEM200	0.789502	0.103472	0.933018	0.807533	0.545288	0.960503	0.885304	0.473113	0.964054	1	1	1	1	1	1	1	1	1	1	1	1	1	1	1	1	1	1	1	1	1	1	1	1	1	1	1	1	1	1	1	1	1	1	1	1	1	1	1
210	MEM201	0.858984	0.599325	0.810627	0.562984	0.7521	0.695634	0.56745	0.90731	0.778919	1	1	1	1	1	1	1	1	1	1	1	1	1	1	1	1	1	1	1	1	1	1	1	1	1	1	1	1	1	1	1	1	1	1	1	1	1	1	1
211	MEM202	0.848266	0.776188	0.954649	0.396062	0.70321	0.940649	0.507607	0.859726	0.477907	1	1	1	1	1	1	1	1	1	1	1	1	1	1	1	1	1	1	1	1	1	1	1	1	1	1	1	1	1	1	1	1	1	1	1	1	1	1	1
212	MEM203	0.92292	0.530743	0.918705	0.68715	0.549043	0.832439	0.761149	0.888955	0.857073	1	1	1	1	1	1	1	1	1	1	1	1	1	1	1	1	1	1	1	1	1	1	1	1	1	1	1	1	1	1	1	1	1	1	1	1	1	1	1
213	MEM204	0.440129	0.962754	0.997803	0.874514	0.107814	0.256371	0.583023	0.564981	0.714012	1	1	1	1	1	1	1	1	1	1	1	1	1	1	1	1	1	1	1	1	1	1	1	1	1	1	1	1	1	1	1	1	1	1	1	1	1	1	1
214	MEM205	0.937746	0.721649	0.97736	0.640747	0.919369	0.443946	0.600056	0.842076	0.367506	1	1	1	1	1	1	1	1	1	1	1	1	1	1	1	1	1	1	1	1	1	1	1	1	1	1	1	1	1	1	1	1	1	1	1	1	1	1	1
215	MEM206	0.658991	0.773103	0.837909	0.727397	0.850205	0.241243	0.900038	0.330529	0.968597	1	1	1	1	1	1	1	1	1	1	1	1	1	1	1	1	1	1	1	1	1	1	1	1	1	1	1	1	1	1	1	1	1	1	1	1	1	1	1
216	MEM207	0.339286	0.751515	0.896408	0.891496	0.59033	0.343171	0.810331	0.771129	0.963836	1	1	1	1	1	1	1	1	1	1	1	1	1	1	1	1	1	1	1	1	1	1	1	1	1	1	1	1	1	1	1	1	1	1	1	1	1	1	1
217	MEM208	0.738348	0.664536	0.989112	0.781354	0.901468	0.230057	0.324601	0.695506	0.689171	1	1	1	1	1	1	1	1	1	1	1	1	1	1	1	1	1	1	1	1	1	1	1	1	1	1	1	1	1	1	1	1	1	1	1	1	1	1	1
218	MEM209	0.846757	0.755955	0.996688	0.593556	0.934574	0.975494	0.688425	0.977636	0.519377	1	1	1	1	1	1	1	1	1	1	1	1	1	1	1	1	1	1	1	1	1	1	1	1	1	1	1	1	1	1	1	1	1	1	1	1	1	1	1
219	MEM210	0.956242	0.282076	0.91414	0.57502	0.810984	0.930761	0.485331	0.699202	0.937033	1	1	1	1	1	1	1	1	1	1	1	1	1	1	1	1	1	1	1	1	1	1	1	1	1	1	1	1	1	1	1	1	1	1	1	1	1	1	1
220	MEM211	0.81753	0.552849	0.941597	0.751275	0.676499	0.88914	0.412616	0.901943	0.738512	1	1	1	1	1	1	1	1	1	1	1	1	1	1	1	1	1	1	1	1	1	1	1	1	1	1	1	1	1	1	1	1	1	1	1	1	1	1	1
221	MEM212	0.83085	0.264411	0.911059	0.916271	0.910892	0.918942	0.512004	0.673156	0.411861	1	1	1	1	1	1	1	1	1	1	1	1	1	1	1	1	1	1	1	1	1	1	1	1	1	1	1	1	1	1	1	1	1	1	1	1	1	1	1
222	MEM213	0.713328	0.938806	0.679979	0.80455	0.833491	0.983762	0.767521	0.762093	0.973077	1	1	1	1	1	1	1	1	1	1	1	1	1	1	1	1	1	1	1	1	1	1	1	1	1	1	1	1	1	1	1	1	1	1	1	1	1	1	1
223	MEM214	0.931536	0.666388	0.94933	0.550386	0.792211	0.761662	0.588932	0.625863	0.324271	1	1	1	1	1	1	1	1	1	1	1	1	1	1	1	1	1	1	1	1	1	1	1	1	1	1	1	1	1	1	1	1	1	1	1	1	1	1	1
224	MEM215	0.684789	0.200871	0.967154	0.718887	0.675134	0.21509	0.324281	0.253345	0.602213	1	1	1	1	1	1	1	1	1	1	1	1	1	1	1	1	1	1	1	1	1	1	1	1	1	1	1	1	1	1	1	1	1	1	1	1	1	1	1
225	MEM216	0.802801	0.727866	0.916072	0.38065	0.615731	0.438135	0.728167	0.431229	0.89651	1	1	1	1	1	1	1	1	1	1	1	1	1	1	1	1	1	1	1	1	1	1	1	1	1	1	1	1	1	1	1	1	1	1	1	1	1	1	1
226	MEM217	0.892653	0.836091	0.786162	0.214916	0.627692	0.872245	0.971508	0.919427	0.567593	1	1	1	1	1	1	1	1	1	1	1	1	1	1	1	1	1	1	1	1	1	1	1	1	1	1	1	1	1	1	1	1	1	1	1	1	1	1	1
227	MEM218	0.783872	0.92985	0.52433	0.569867	0.849843	0.363343	0.778649	0.971495	0.102581	1	1	1	1	1	1	1	1	1	1	1	1	1	1	1	1	1	1	1	1	1	1	1	1	1	1	1	1	1	1	1	1	1	1	1	1	1	1	1
228	MEM219	0.658315	0.956439	0.713671	0.304201	0.937802	0.198256	0.500628	0.789026	0.926045	1	1	1	1	1	1	1	1	1	1	1	1	1	1	1	1	1	1	1	1	1	1	1	1	1	1	1	1	1	1	1	1	1	1	1	1	1	1	1
229	MEM220	0.677339	0.59582	0.894251	0.73175	0.921712	0.503647	0.758822	0.988343	0.905381	1	1	1	1	1	1	1	1	1	1	1	1	1	1	1	1	1	1	1	1	1	1	1	1	1	1	1	1	1	1	1	1	1	1	1	1	1	1	1
230	MEM221	0.860675	0.616572	0.960161	0.225379	0.249165	0.138309	0.552138	0.394561	0.0761057	1	1	1	1	1	1	1	1	1	1	1	1	1	1	1	1	1	1	1	1	1	1	1	1	1	1	1	1	1	1	1	1	1	1	1	1	1	1	1
231	MEM222	0.767572	0.567432	0.938076	0.622799	0.764868	0.0308088	0.34949	0.959464	0.688691	1	1	1	1	1	1	1	1	1	1	1	1	1	1	1	1	1	1	1	1	1	1	1	1	1	1	1	1	1	1	1	1	1	1	1	1	1	1	1
232	MEM223	0.860099	0.922536	0.810024	0.892961	0.594251	0.805266	0.625807	0.714708	0.995877	1	1	1	1	1	1	1	1	1	1	1	1	1	1	1	1	1	1	1	1	1	1	1	1	1	1	1	1	1	1	1	1	1	1	1	1	1	1	1
233	MEM224	0.729627	0.490613	0.0898669	0.407508	0.745559	0.8555	0.815096	0.632371	0.926227	1	1	1	1	1	1	1	1	1	1	1	1	1	1	1	1	1	1	1	1	1	1	1	1	1	1	1	1	1	1	1	1	1	1	1	1	1	1	1
234	MEM225	0.939743	0.635042	0.670726	0.675291	0.697933	0.978494	0.853221	0.611376	0.918927	1	1	1	1	1	1	1	1	1	1	1	1	1	1	1	1	1	1	1	1	1	1	1	1	1	1	1	1	1	1	1	1	1	1	1	1	1	1	1
235	MEM226	0.855986	0.352934	0.967388	0.643762	0.890634	0.99556	0.722674	0.532325	0.520158	1	1	1	1	1	1	1	1	1	1	1	1	1	1	1	1	1	1	1	1	1	1	1	1	1	1	1	1	1	1	1	1	1	1	1	1	1	1	1
236	MEM227	0.709395	0.731038	0.927063	0.913548	0.188427	0.547054	0.534801	0.568447	0.92591	1	1	1	1	1	1	1	1	1	1	1	1	1	1	1	1	1	1	1	1	1	1	1	1	1	1	1	1	1	1	1	1	1	1	1	1	1	1	1
237	MEM228	0.92798	0.8733	0.984226	0.997802	0.90978	0.373271	0.345212	0.361295	0.592317	1	1	1	1	1	1	1	1	1	1	1	1	1	1	1	1	1	1	1	1	1	1	1	1	1	1	1	1	1	1	1	1	1	1	1	1	1	1	1
238	MEM229	0.5792	0.904918	0.9717	0.712548	0.436418	0.432109	0.605433	0.817507	0.421407	1	1	1	1	1	1	1	1	1	1	1	1	1	1	1	1	1	1	1	1	1	1	1	1	1	1	1	1	1	1	1	1	1	1	1	1	1	1	1
239	MEM230	0.67205	0.491086	0.9077	0.969489	0.0491447	0.988633	0.590187	0.594045	0.847837	1	1	1	1	1	1	1	1	1	1	1	1	1	1	1	1	1	1	1	1	1	1	1	1	1	1	1	1	1	1	1	1	1	1	1	1	1	1	1
240	MEM231	0.994962	0.922521	0.838799	0.384443	0.732185	0.108286	0.364422	0.302959	0.0976773	1	1	1	1	1	1	1	1	1	1	1	1	1	1	1	1	1	1	1	1	1	1	1	1	1	1	1	1	1	1	1	1	1	1	1	1	1	1	1
241	MEM232	0.843907	0.910834	0.929281	0.664495	0.598262	0.0377063	0.249169	0.171418	0.147177	1	1	1	1	1	1	1	1	1	1	1	1	1	1	1	1	1	1	1	1	1	1	1	1	1	1	1	1	1	1	1	1	1	1	1	1	1	1	1
242	MEM233	0.697252	0.520277	0.980493	0.846864	0.155315	0.20287	0.390007	0.841754	0.496266	1	1	1	1	1	1	1	1	1	1	1	1	1	1	1	1	1	1	1	1	1	1	1	1	1	1	1	1	1	1	1	1	1	1	1	1	1	1	1
243	MEM234	0.763922	0.909899	0.995979	0.74081	0.691968	0.526446	0.72429	0.621292	0.848758	1	1	1	1	1	1	1	1	1	1	1	1	1	1	1	1	1	1	1	1	1	1	1	1	1	1	1	1	1	1	1	1	1	1	1	1	1	1	1
244	MEM235	0.862062	0.207536	0.926677	0.633147	0.230923	0.432944	0.892553	0.50136	0.668606	1	1	1	1	1	1	1	1	1	1	1	1	1	1	1	1	1	1	1	1	1	1	1	1	1	1	1	1	1	1	1	1	1	1	1	1	1	1	1
245	MEM236	0.509707	0.971586	0.84348	0.439948	0.592829	0.642612	0.992161	0.504063	0.485003	1	1	1	1	1	1	1	1	1	1	1	1	1	1	1	1	1	1	1	1	1	1	1	1	1	1	1	1	1	1	1	1	1	1	1	1	1	1	1
246	MEM237	0.960398	0.0282315	0.95101	0.917495	0.368741	0.591527	0.98003	0.406262	0.650847	1	1	1	1	1	1	1	1	1	1	1	1	1	1	1	1	1	1	1	1	1	1	1	1	1	1	1	1	1	1	1	1	1	1	1	1	1	1	1
247	MEM238	0.996464	0.772722	0.712263	0.781003	0.89629	0.390245	0.74018	0.398986	0.807204	1	1	1	1	1	1	1	1	1	1	1	1	1	1	1	1	1	1	1	1	1	1	1	1	1	1	1	1	1	1	1	1	1	1	1	1	1	1	1
248	MEM239	0.409899	0.51777	0.863086	0.541488	0.762582	0.996659	0.811487	0.897669	0.628719	1	1	1	1	1	1	1	1	1	1	1	1	1	1	1	1	1	1	1	1	1	1	1	1	1	1	1	1	1	1	1	1	1	1	1	1	1	1	1
249	MEM240	0.759065	0.721625	0.946494	0.698815	0.599534	0.402613	0.780702	0.850075	0.611008	1	1	1	1	1	1	1	1	1	1	1	1	1	1	1	1	1	1	1	1	1	1	1	1	1	1	1	1	1	1	1	1	1	1	1	1	1	1	1
250	MEM241	0.589217	0.940826	0.87169	0.539416	0.413446	0.442622	0.771163	0.818302	0.998789	1	1	1	1	1	1	1	1	1	1	1	1	1	1	1	1	1	1	1	1	1	1	1	1	1	1	1	1	1	1	1	1	1	1	1	1	1	1	1
251	MEM242	0.845907	0.414389	0.915057	0.864209	0.766856	0.808653	0.832877	0.430573	0.585055	1	1	1	1	1	1	1	1	1	1	1	1	1	1	1	1	1	1	1	1	1	1	1	1	1	1	1	1	1	1	1	1	1	1	1	1	1	1	1
252	MEM243	0.703796	0.274834	0.838815	0.363049	0.990563	0.958076	0.901261	0.651365	0.383663	1	1	1	1	1	1	1	1	1	1	1	1	1	1	1	1	1	1	1	1	1	1	1	1	1	1	1	1	1	1	1	1	1	1	1	1	1	1	1
253	MEM244	0.811671	0.505697	0.764591	0.737145	0.343569	0.431851	0.913092	0.979961	0.751926	1	1	1	1	1	1	1	1	1	1	1	1	1	1	1	1	1	1	1	1	1	1	1	1	1	1	1	1	1	1	1	1	1	1	1	1	1	1	1
254	MEM245	0.250401	0.717749	0.903528	0.754063	0.434893	0.605124	0.720151	0.940717	0.793474	1	1	1	1	1	1	1	1	1	1	1	1	1	1	1	1	1	1	1	1	1	1	1	1	1	1	1	1	1	1	1	1	1	1	1	1	1	1	1
255	MEM246	0.952058	0.694113	0.95959	0.206617	0.616523	0.671416	0.948705	0.868498	0.970909	1	1	1	1	1	1	1	1	1	1	1	1	1	1	1	1	1	1	1	1	1	1	1	1	1	1	1	1	1	1	1	1	1	1	1	1	1	1	1
256	MEM247	0.874006	0.916094	0.98142	0.539843	0.875805	0.69463	0.977883	0.799744	0.955393	1	1	1	1	1	1	1	1	1	1	1	1	1	1	1	1	1	1	1	1	1	1	1	1	1	1	1	1	1	1	1	1	1	1	1	1	1	1	1
257	MEM248	0.932926	0.634393	0.995172	0.622103	0.798164	0.0828434	0.607694	0.685669	0.232141	1	1	1	1	1	1	1	1	1	1	1	1	1	1	1	1	1	1	1	1	1	1	1	1	1	1	1	1	1	1	1	1	1	1	1	1	1	1	1
258	MEM249	0.689088	0.984039	0.999764	0.50255	0.80913	0.852543	0.969323	0.880736	0.47545	1	1	1	1	1	1	1	1	1	1	1	1	1	1	1	1	1	1	1	1	1	1	1	1	1	1	1	1	1	1	1	1	1	1	1	1	1	1	1
259	MEM250	0.774087	0.265214	0.977282	0.92926	0.698856	0.453478	0.508863	0.273495	0.589901	1	1	1	1	1	1	1	1	1	1	1	1	1	1	1	1	1	1	1	1	1	1	1	1	1	1	1	1	1	1	1	1	1	1	1	1	1	1	1
260	MEM251	0.865747	0.54519	0.996	0.706023	0.748411	0.548959	0.796186	0.587511	0.842014	1	1	1	1	1	1	1	1	1	1	1	1	1	1	1	1	1	1	1	1	1	1	1	1	1	1	1	1	1	1	1	1	1	1	1	1	1	1	1
261	MEM252	0.220992	0.400267	0.830871	0.208702	0.767471	0.757023	0.867807	0.953838	0.7392	1	1	1	1	1	1	1	1	1	1	1	1	1	1	1	1	1	1	1	1	1	1	1	1	1	1	1	1	1	1	1	1	1	1	1	1	1	1	1
262	MEM253	0.657432	0.436926	0.819541	0.364256	0.876771	0.867125	0.265133	0.625286	0.680403	1	1	1	1	1	1	1	1	1	1	1	1	1	1	1	1	1	1	1	1	1	1	1	1	1	1	1	1	1	1	1	1	1	1	1	1	1	1	1
263	MEM254	0.880418	0.752476	0.434998	0.221402	0.536871	0.327767	0.816899	0.66442	0.99984	1	1	1	1	1	1	1	1	1	1	1	1	1	1	1	1	1	1	1	1	1	1	1	1	1	1	1	1	1	1	1	1	1	1	1	1	1	1	1
264	MEM255	0.644884	0.56731	0.772377	0.701994	0.683468	0.948263	0.54942	0.860992	0.977056	1	1	1	1	1	1	1	1	1	1	1	1	1	1	1	1	1	1	1	1	1	1	1	1	1	1	1	1	1	1	1	1	1	1	1	1	1	1	1
265	MEM256	0.752341	0.946699	0.736003	0.76505	0.92537	0.817593	0.695895	0.946939	0.963406	1	1	1	1	1	1	1	1	1	1	1	1	1	1	1	1	1	1	1	1	1	1	1	1	1	1	1	1	1	1	1	1	1	1	1	1	1	1	1
266	MEM257	0.978764	0.617833	0.516339	0.725846	0.543802	0.533691	0.795112	0.657641	0.87842	1	1	1	1	1	1	1	1	1	1	1	1	1	1	1	1	1	1	1	1	1	1	1	1	1	1	1	1	1	1	1	1	1	1	1	1	1	1	1
267	MEM258	0.900725	0.400858	0.943002	0.533249	0.926266	0.630716	0.634937	0.760319	0.8515	1	1	1	1	1	1	1	1	1	1	1	1	1	1	1	1	1	1	1	1	1	1	1	1	1	1	1	1	1	1	1	1	1	1	1	1	1	1	1
268	MEM259	0.602438	0.954524	0.965022	0.499811	0.963319	0.991554	0.882395	0.879993	0.924318	1	1	1	1	1	1	1	1	1	1	1	1	1	1	1	1	1	1	1	1	1	1	1	1	1	1	1	1	1	1	1	1	1	1	1	1	1	1	1
269	MEM260	0.968118	0.671946	0.954965	0.715848	0.889916	0.961957	0.897689	0.8891	0.98882	1	1	1	1	1	1	1	1	1	1	1	1	1	1	1	1	1	1	1	1	1	1	1	1	1	1	1	1	1	1	1	1	1	1	1	1	1	1	1
270	MEM261	0.662479	0.763207	0.784983	0.56612	0.963197	0.391813	0.74491	0.934322	0.435308	1	1	1	1	1	1	1	1	1	1	1	1	1	1	1	1	1	1	1	1	1	1	1	1	1	1	1	1	1	1	1	1	1	1	1	1	1	1	1
271	MEM262	0.944017	0.819817	0.856515	0.627633	0.961162	0.537209	0.984005	0.838753	0.669676	1	1	1	1	1	1	1	1	1	1	1	1	1	1	1	1	1	1	1	1	1	1	1	1	1	1	1	1	1	1	1	1	1	1	1	1	1	1	1
272	MEM263	0.91683	0.906637	0.993568	0.924795	0.874747	0.954943	0.979717	0.984357	0.98444	1	1	1	1	1	1	1	1	1	1	1	1	1	1	1	1	1	1	1	1	1	1	1	1	1	1	1	1	1	1	1	1	1	1	1	1	1	1	1
[truncated: 224 more columns]

## Sheet: corr
seq		altitude	dist_sorg_staz	cond	O2	temp	O2percsat	pH	TP	NH4ug	MEM1	MEM2	MEM3	MEM4	MEM5	MEM6	MEM7	MEM8	MEM9	MEM10	MEM11	MEM12	MEM13	MEM14	MEM15	MEM16	MEM17	MEM18	MEM19	MEM20	MEM21	MEM22	MEM23	MEM24	MEM25	MEM26	MEM27	MEM28	MEM29	MEM30	MEM31	MEM32	MEM33	MEM34	MEM35	MEM36	MEM37	MEM38	MEM39
1	altitude	1	-0.316186	-0.231338	-0.0727345	-0.472371	0.0592003	-0.326693	-0.178663	-0.144304	0.290562	0.0865533	-0.0448037	0.247949	0.284399	0.261996	-0.0324835	0.0288781	0.184013	0.186449	-0.0844501	-0.222407	0.129531	0.000414626	0.179805	-0.00722451	-0.020812	0.16943	-0.129147	0.00172361	0.0379334	0.169952	0.0582943	0.0462855	-0.138312	-0.0519197	0.0407608	-0.102948	-0.0903816	-0.00811005	-0.0410421	0.00720523	-0.0149114	-0.0708288	0.013343	-0.00451172	0.0875459	-0.00389066	0.00845739
2	dist_sorg_staz	-0.316186	1	-0.0143222	-0.139502	0.28561	-0.219133	-0.124867	0.418955	-0.08685	-0.0210612	-0.159952	-0.120256	-0.0497182	-0.160234	-0.215083	0.10634	0.071853	-0.308713	0.0667713	-0.280532	0.128495	-0.136427	-0.0772085	-0.0687472	-0.0297449	-0.159926	-0.119336	0.0349941	-0.0665205	0.020751	-0.0391822	0.151522	-0.121622	0.0151145	0.0763028	0.0591427	0.0806447	-0.117723	-0.035421	-0.0120561	-0.0226086	0.0597094	0.00158074	0.0431206	0.0619178	0.0808452	-0.115748	-0.0468311
3	cond	-0.231338	-0.0143222	1	0.0630627	0.21132	0.028692	0.321253	-0.0316764	0.0571496	-0.490835	0.588511	-0.36542	-0.135458	-0.202896	-0.00325219	0.155463	-0.108044	0.0731725	-0.0379468	0.0862356	0.0523089	-0.0851757	0.0121766	0.0687961	0.0244538	-0.0344022	0.000455287	0.00857546	0.0615802	-0.00109218	-0.0831336	0.0486829	-0.0411575	0.0273232	-0.126048	0.0679039	0.0201066	0.0421934	-0.0813126	-0.000404572	0.040161	0.0421424	-0.0215033	0.0331522	0.0143995	-0.0489454	-0.0297817	-0.0189208
4	O2	-0.0727345	-0.139502	0.0630627	1	-0.0304459	0.5164	0.313574	-0.287471	0.0583709	0.229791	-0.0111828	-0.276204	-0.413702	-0.0330922	0.00492745	-0.035185	-0.0343575	0.156181	-0.151739	0.0985039	0.141938	0.0907865	0.163216	0.00700722	0.0450693	0.244942	0.00865554	-0.0306794	0.0353379	0.110319	0.0837486	-0.033979	0.093754	0.15386	-0.0637488	-0.125953	0.0319263	-0.0525938	0.0882784	-0.075483	0.041192	0.0372299	0.0651631	0.0300866	-0.0158459	-0.0109451	-0.0121165	0.0156789
5	temp	-0.472371	0.28561	0.21132	-0.0304459	1	-0.0787255	0.233738	0.124618	0.0610599	-0.243027	-0.0310141	0.0937166	-0.111401	-0.378895	-0.0138381	-0.0178755	-0.113002	-0.125169	0.0191321	-0.0972307	0.139626	-0.173675	0.0751953	-0.160123	-0.00552493	-0.0861025	-0.0104714	0.0626179	-0.140598	-0.0244253	-0.0355535	0.0439583	0.0149925	0.147441	0.00279194	-0.0644995	0.109658	-0.00218443	-0.0328973	-0.0745032	0.0766674	-0.138208	-0.105252	-0.0741121	0.150347	-0.0231784	-0.0237574	0.00698067
6	O2percsat	0.0592003	-0.219133	0.028692	0.5164	-0.0787255	1	0.267323	-0.369313	0.00273205	0.12791	0.0245568	-0.0432207	-0.260264	0.00623895	-0.0464435	-0.058839	0.128661	0.120358	-0.0145995	0.0287349	0.12666	0.034606	0.217137	0.233097	0.188562	0.147542	0.0209946	-0.110067	0.0963202	0.113612	0.159148	0.0082199	-0.0128912	0.165461	-0.0560793	-0.0422117	0.0423107	-0.000802638	-0.0170914	-0.0324193	0.15805	-0.135065	0.207527	0.0297718	-0.10265	-0.0675506	-0.0669998	0.0315272
7	pH	-0.326693	-0.124867	0.321253	0.313574	0.233738	0.267323	1	-0.134985	0.119808	-0.190089	0.146485	0.261382	-0.280458	-0.128459	0.00933111	0.148101	-0.0171926	0.197444	-0.199816	0.141898	0.295645	-0.105114	0.254368	0.102421	-0.0822221	0.0264379	0.00390657	-0.0248577	0.110532	-0.0231274	-0.150088	-0.104072	0.164371	0.0861922	-0.107323	0.0406657	0.112941	-0.0430441	0.0540009	-0.044787	0.0453765	0.0271775	-0.0472023	0.0521495	-0.0426307	-0.0802022	-0.0675751	0.0165492
8	TP	-0.178663	0.418955	-0.0316764	-0.287471	0.124618	-0.369313	-0.134985	1	0.155326	-0.107739	-0.163298	0.0081275	0.0446603	0.0546152	-0.272923	0.079764	0.130823	-0.051003	-0.0482332	-0.0974706	0.0889534	-0.199515	-0.190149	-0.178324	0.0268731	-0.0549399	0.0326171	0.0455359	-0.0444002	0.0621931	0.0488662	0.0314383	-0.0607262	-0.080713	0.0479598	0.0415166	0.140983	-0.0166971	-0.103386	-0.0976855	0.0207932	0.0712168	-0.15159	0.0521774	0.153294	0.0317556	0.0527524	-0.0780702
9	NH4ug	-0.144304	-0.08685	0.0571496	0.0583709	0.0610599	0.00273205	0.119808	0.155326	1	-0.032572	-0.147034	0.0272448	-0.196036	-0.0562403	-0.0326637	0.0221805	0.0396285	0.101566	0.166908	0.43079	0.166334	0.0168293	-0.141682	-0.0906603	0.256643	-0.161284	0.109253	0.172709	0.0483507	0.0390735	-0.155477	0.134861	0.0937178	-0.125255	-0.20425	0.0968013	0.142078	0.0889921	-0.0043821	-0.0232632	0.0215976	-0.111834	0.109647	-0.0235361	-0.0219275	0.0465817	0.0653354	-0.0807773
10	MEM1	0.290562	-0.0210612	-0.490835	0.229791	-0.243027	0.12791	-0.190089	-0.107739	-0.032572	1	-1.41638e-13	5.73699e-15	-7.48055e-15	-6.0053e-16	-1.32743e-14	-1.45136e-14	-5.72101e-15	-2.47109e-15	-2.26755e-15	6.82745e-16	1.17961e-15	-7.06506e-17	1.11022e-16	-7.93978e-16	6.42584e-16	1.03116e-15	-1.85542e-15	-4.25417e-15	1.92565e-15	-8.32667e-17	-1.39409e-15	3.18874e-16	-8.07435e-16	3.99512e-16	-9.75651e-17	-7.19122e-17	2.85967e-17	1.27003e-16	-1.22125e-15	-2.57843e-16	1.86719e-16	8.06594e-16	-5.88755e-16	1.78477e-15	-1.03779e-15	1.34572e-16	-5.73458e-16	1.59847e-15
11	MEM2	0.0865533	-0.159952	0.588511	-0.0111828	-0.0310141	0.0245568	0.146485	-0.163298	-0.147034	-1.41638e-13	1	1.75415e-14	8.92131e-15	-3.09382e-14	-2.60307e-14	2.7335e-15	7.66559e-15	1.98e-14	5.53892e-15	-1.41701e-15	8.02809e-16	-4.31053e-16	8.6732e-15	1.12048e-14	-3.12124e-15	-1.10539e-15	8.64208e-16	-2.86597e-15	2.80163e-15	-2.79238e-16	-4.28203e-15	1.08121e-15	7.71269e-16	-7.8767e-16	9.80697e-16	-7.82203e-17	1.37516e-16	4.90349e-16	-2.02868e-15	-9.73548e-17	8.41078e-18	-2.0312e-16	2.75243e-16	-3.33782e-15	1.94311e-15	-2.12582e-16	5.8405e-16	3.86686e-16
12	MEM3	-0.0448037	-0.120256	-0.36542	-0.276204	0.0937166	-0.0432207	0.261382	0.0081275	0.0272448	5.73699e-15	1.75415e-14	1	-3.81849e-15	8.24929e-15	-3.1736e-15	1.12116e-15	2.28353e-15	3.05522e-16	-5.87914e-16	1.73157e-16	-1.8939e-15	1.09761e-16	-3.13722e-16	5.01283e-16	-2.86808e-16	3.63346e-16	-2.97321e-16	-9.84061e-17	-1.07868e-16	1.0545e-16	8.93645e-18	7.73266e-17	-1.38778e-16	-1.06396e-16	-4.20539e-16	-4.49977e-17	9.6724e-17	1.54338e-16	-4.97918e-16	1.963e-16	-7.99024e-17	-3.22133e-16	2.86387e-16	1.54969e-16	3.89261e-17	1.20064e-16	-1.20511e-16	1.14092e-15
13	MEM4	0.247949	-0.0497182	-0.135458	-0.413702	-0.111401	-0.260264	-0.280458	0.0446603	-0.196036	-7.48055e-15	8.92131e-15	-3.81849e-15	1	2.94966e-15	-1.48049e-14	-1.95971e-15	2.09428e-16	-2.72236e-15	1.79465e-15	-5.26147e-16	3.49047e-17	-3.57458e-17	5.58055e-16	4.1381e-16	-1.72842e-16	9.8301e-17	-4.12128e-17	-5.20627e-16	2.31086e-16	2.48118e-17	6.50153e-16	-8.67362e-18	3.62505e-16	-1.11443e-16	-3.5115e-16	2.31296e-17	3.2802e-17	-6.98095e-17	6.02212e-16	4.14757e-17	-1.13966e-16	-2.56108e-16	1.81042e-16	-5.17684e-16	1.54377e-16	-2.29194e-17	-1.24243e-16	-2.33757e-15
14	MEM5	0.284399	-0.160234	-0.202896	-0.0330922	-0.378895	0.00623895	-0.128459	0.0546152	-0.0562403	-6.0053e-16	-3.09382e-14	8.24929e-15	2.94966e-15	1	2.91442e-14	-1.56609e-15	-3.06152e-16	8.70137e-15	6.36276e-16	1.58333e-16	2.63173e-15	-4.87825e-17	4.08764e-16	2.35502e-17	3.14563e-16	2.1027e-16	-8.41078e-19	7.07347e-16	1.74944e-16	6.1609e-17	3.17297e-16	9.35699e-18	-2.01859e-17	5.80344e-17	-1.05471e-15	5.88755e-18	-2.77556e-17	7.90613e-17	-7.40149e-17	3.60875e-17	-8.74721e-17	-2.69986e-16	-2.52323e-17	3.13302e-16	5.84576e-16	-3.61664e-17	-3.11199e-17	-1.53959e-15
15	MEM6	0.261996	-0.215083	-0.00325219	0.00492745	-0.0138381	-0.0464435	0.00933111	-0.272923	-0.0326637	-1.32743e-14	-2.60307e-14	-3.1736e-15	-1.48049e-14	2.91442e-14	1	-6.77211e-14	-9.68291e-15	-3.32215e-15	-3.577e-15	8.40973e-16	1.0933e-15	-2.55688e-16	1.25447e-15	2.14349e-15	-5.41654e-16	-6.3412e-16	9.83431e-16	2.97048e-15	-1.16994e-15	2.33925e-17	1.1625e-15	4.28161e-16	3.36431e-16	-2.75874e-16	1.87455e-15	-7.63278e-17	-3.7428e-17	3.59561e-17	-2.09849e-16	4.99127e-17	2.7335e-18	1.35098e-16	2.59683e-17	-4.8751e-16	-1.06005e-15	-1.18802e-17	3.85187e-17	-2.34062e-15
16	MEM7	-0.0324835	0.10634	0.155463	-0.035185	-0.0178755	-0.058839	0.148101	0.079764	0.0221805	-1.45136e-14	2.7335e-15	1.12116e-15	-1.95971e-15	-1.56609e-15	-6.77211e-14	1	-6.16342e-15	-9.05421e-16	1.0892e-16	4.45771e-17	-1.12915e-15	-4.79414e-17	-1.65692e-16	-7.03141e-16	5.26515e-16	-1.91135e-16	2.72509e-16	7.15757e-16	3.57668e-16	-5.63522e-17	-6.85794e-16	-8.4481e-16	-2.8849e-16	9.42007e-17	-1.30788e-15	3.2802e-17	2.94377e-17	2.05223e-16	-1.85037e-17	5.94274e-17	8.41078e-18	-4.87825e-17	6.05576e-17	-4.81517e-16	1.44665e-15	4.33155e-17	-5.04647e-17	1.462e-15
17	MEM8	0.0288781	0.071853	-0.108044	-0.0343575	-0.113002	0.128661	-0.0171926	0.130823	0.0396285	-5.72101e-15	7.66559e-15	2.28353e-15	2.09428e-16	-3.06152e-16	-9.68291e-15	-6.16342e-15	1	-2.03835e-15	-1.59721e-15	7.80731e-16	-1.52614e-15	2.35502e-17	-2.77556e-16	-8.61264e-16	-4.2138e-16	1.34783e-16	1.18592e-16	5.0717e-16	3.91101e-16	-1.7978e-16	-7.51083e-16	1.79465e-15	-6.89684e-17	8.6631e-17	1.26835e-15	-1.6401e-17	4.03717e-17	8.41078e-18	1.61487e-16	1.18855e-16	1.99335e-16	-2.22045e-16	-1.58543e-16	1.69057e-16	-1.90026e-15	-1.85878e-16	-5.7351e-17	1.61109e-15
18	MEM9	0.184013	-0.308713	0.0731725	0.156181	-0.125169	0.120358	0.197444	-0.051003	0.101566	-2.47109e-15	1.98e-14	3.05522e-16	-2.72236e-15	8.70137e-15	-3.32215e-15	-9.05421e-16	-2.03835e-15	1	1.49475e-14	-4.87192e-15	-4.46329e-15	1.93448e-16	-3.05711e-15	-3.56701e-15	8.65259e-16	-5.73773e-16	9.54624e-16	3.18642e-15	-1.64515e-15	7.28584e-17	9.47054e-16	-1.273e-15	-4.4451e-16	2.71458e-16	5.41654e-16	1.56651e-17	-1.17751e-16	-1.96392e-16	1.07658e-15	1.7273e-16	-1.51394e-17	-6.94941e-16	4.32524e-16	3.27705e-16	7.19385e-17	3.94255e-17	-1.29473e-16	1.13503e-15
19	MEM10	0.186449	0.0667713	-0.0379468	-0.151739	0.0191321	-0.0145995	-0.199816	-0.0482332	0.166908	-2.26755e-15	5.53892e-15	-5.87914e-16	1.79465e-15	6.36276e-16	-3.577e-15	1.0892e-16	-1.59721e-15	1.49475e-14	1	4.21433e-16	-8.3088e-16	-2.52323e-18	8.09538e-17	-1.61487e-15	-6.72084e-15	-1.17751e-17	7.59073e-17	2.7314e-16	-8.95222e-16	4.4104e-17	1.09677e-15	3.00262e-15	1.51394e-17	5.97165e-17	-2.58169e-15	-9.36751e-17	1.23008e-16	3.95307e-17	-6.05576e-17	-4.31578e-17	-6.05576e-17	1.81463e-16	1.80832e-17	2.0249e-16	1.1748e-15	6.52887e-17	3.81192e-16	-1.94562e-15
20	MEM11	-0.0844501	-0.280532	0.0862356	0.0985039	-0.0972307	0.0287349	0.141898	-0.0974706	0.43079	6.82745e-16	-1.41701e-15	1.73157e-16	-5.26147e-16	1.58333e-16	8.40973e-16	4.45771e-17	7.80731e-16	-4.87192e-15	4.21433e-16	1	2.19004e-15	-1.06186e-16	4.12339e-16	-2.63468e-16	-1.38803e-14	-2.6356e-16	-6.94941e-17	-2.7109e-16	-3.8314e-15	1.4456e-17	-6.62756e-16	5.34932e-16	-6.93889e-17	6.40796e-17	1.03526e-15	7.42251e-17	9.43584e-17	1.75365e-16	-5.08852e-17	-3.96292e-17	7.09134e-17	7.9955e-17	5.49855e-17	-3.46419e-17	-2.50666e-16	-1.3615e-17	7.7782e-16	1.02354e-15
21	MEM12	-0.222407	0.128495	0.0523089	0.141938	0.139626	0.12666	0.295645	0.0889534	0.166334	1.17961e-15	8.02809e-16	-1.8939e-15	3.49047e-17	2.63173e-15	1.0933e-15	-1.12915e-15	-1.52614e-15	-4.46329e-15	-8.3088e-16	2.19004e-15	1	3.62715e-16	-4.62593e-16	4.62593e-17	-2.91455e-15	-2.97531e-16	-1.35098e-16	-7.72951e-16	8.88652e-16	1.26162e-17	-1.96865e-17	3.38685e-15	3.1961e-17	-5.67728e-18	-2.83422e-15	1.86089e-17	7.84305e-17	-1.08289e-16	1.04714e-16	-1.15648e-17	-9.37802e-17	2.74927e-16	-2.09534e-16	2.67778e-16	2.03933e-15	1.57702e-17	4.38938e-18	2.30576e-15
22	MEM13	0.129531	-0.136427	-0.0851757	0.0907865	-0.173675	0.034606	-0.105114	-0.199515	0.0168293	-7.06506e-17	-4.31053e-16	1.09761e-16	-3.57458e-17	-4.87825e-17	-2.55688e-16	-4.79414e-17	2.35502e-17	1.93448e-16	-2.52323e-18	-1.06186e-16	3.62715e-16	1	2.94377e-18	-3.82691e-16	-7.06169e-15	-3.54514e-16	-1.18382e-16	-2.96059e-16	3.7122e-15	6.48681e-17	-6.70234e-17	1.16899e-15	-4.96236e-17	-3.09096e-16	3.78485e-17	5.00441e-17	9.50418e-17	-4.92031e-16	6.72862e-18	2.48959e-16	-7.52765e-17	-5.25674e-17	1.33626e-15	3.93204e-17	2.81104e-16	-3.65869e-17	6.4947e-17	-1.30367e-16
23	MEM14	0.000414626	-0.0772085	0.0121766	0.163216	0.0751953	0.217137	0.254368	-0.190149	-0.141682	1.11022e-16	8.6732e-15	-3.13722e-16	5.58055e-16	4.08764e-16	1.25447e-15	-1.65692e-16	-2.77556e-16	-3.05711e-15	8.09538e-17	4.12339e-16	-4.62593e-16	2.94377e-18	1	-8.64712e-15	2.26782e-14	-5.20417e-17	-5.28407e-16	-1.82998e-15	-1.94951e-15	3.08045e-17	1.66901e-16	-7.92908e-15	-1.95971e-16	-6.18192e-17	3.44001e-16	2.50221e-17	5.42495e-17	-3.78485e-18	-6.64452e-17	-6.94415e-17	-2.94377e-18	6.13987e-17	9.89318e-17	7.47929e-16	-2.24987e-15	-1.19223e-16	1.10037e-16	-4.88982e-16
24	MEM15	0.179805	-0.0687472	0.0687961	0.00700722	-0.160123	0.233097	0.102421	-0.178324	-0.0906603	-7.93978e-16	1.12048e-14	5.01283e-16	4.1381e-16	2.35502e-17	2.14349e-15	-7.03141e-16	-8.61264e-16	-3.56701e-15	-1.61487e-15	-2.63468e-16	4.62593e-17	-3.82691e-16	-8.64712e-15	1	-5.78098e-14	-1.0524e-15	1.09004e-15	-3.39207e-15	5.25632e-15	-1.29105e-16	2.79658e-16	9.53383e-15	4.74368e-16	-3.22974e-16	1.63337e-15	3.53253e-17	3.44842e-17	7.73792e-17	-6.72862e-17	1.36991e-16	-1.58964e-16	-2.04382e-16	1.1733e-16	-3.10358e-16	1.68933e-15	2.3382e-16	1.89768e-17	-1.81378e-15
25	MEM16	-0.00722451	-0.0297449	0.0244538	0.0450693	-0.00552493	0.188562	-0.0822221	0.0268731	0.256643	6.42584e-16	-3.12124e-15	-2.86808e-16	-1.72842e-16	3.14563e-16	-5.41654e-16	5.26515e-16	-4.2138e-16	8.65259e-16	-6.72084e-15	-1.38803e-14	-2.91455e-15	-7.06169e-15	2.26782e-14	-5.78098e-14	1	-4.64738e-15	2.2949e-14	2.62837e-15	3.02323e-14	3.44527e-16	9.7759e-15	2.58871e-14	6.53097e-16	-2.60524e-15	-1.78981e-15	7.37205e-16	-7.47298e-16	-6.37579e-15	-1.20442e-15	-1.7879e-15	1.1384e-15	6.0095e-16	3.50162e-15	9.32756e-16	-9.79212e-16	-8.5853e-16	1.40581e-15	2.09544e-15
26	MEM17	-0.020812	-0.159926	-0.0344022	0.244942	-0.0861025	0.147542	0.0264379	-0.0549399	-0.161284	1.03116e-15	-1.10539e-15	3.63346e-16	9.8301e-17	2.1027e-16	-6.3412e-16	-1.91135e-16	1.34783e-16	-5.73773e-16	-1.17751e-17	-2.6356e-16	-2.97531e-16	-3.54514e-16	-5.20417e-17	-1.0524e-15	-4.64738e-15	1	3.43002e-16	1.40618e-15	-4.07212e-14	1.02128e-15	1.1239e-15	9.22314e-15	4.28109e-16	9.5147e-17	2.22802e-15	-3.02262e-17	-6.44476e-17	-1.98915e-16	-9.16775e-17	1.20944e-16	-1.48555e-16	-1.95708e-16	-1.68216e-17	1.98337e-16	8.80336e-16	-1.69687e-16	7.07097e-17	3.0447e-16
27	MEM18	0.16943	-0.119336	0.000455287	0.00865554	-0.0104714	0.0209946	0.00390657	0.0326171	0.109253	-1.85542e-15	8.64208e-16	-2.97321e-16	-4.12128e-17	-8.41078e-19	9.83431e-16	2.72509e-16	1.18592e-16	9.54624e-16	7.59073e-17	-6.94941e-17	-1.35098e-16	-1.18382e-16	-5.28407e-16	1.09004e-15	2.2949e-14	3.43002e-16	1	-6.4721e-15	1.91533e-14	1.07826e-15	-1.64284e-15	-4.7769e-15	-6.76227e-16	-2.36553e-16	-2.0106e-15	7.14916e-18	1.09761e-16	-5.17263e-16	-7.65381e-17	3.85845e-17	-1.02822e-16	-2.32558e-16	-2.77451e-16	-3.99933e-16	-1.55577e-15	-1.78309e-16	7.4304e-17	5.87703e-17
28	MEM19	-0.129147	0.0349941	0.00857546	-0.0306794	0.0626179	-0.110067	-0.0248577	0.0455359	0.172709	-4.25417e-15	-2.86597e-15	-9.84061e-17	-5.20627e-16	7.07347e-16	2.97048e-15	7.15757e-16	5.0717e-16	3.18642e-15	2.7314e-16	-2.7109e-16	-7.72951e-16	-2.96059e-16	-1.82998e-15	-3.39207e-15	2.62837e-15	1.40618e-15	-6.4721e-15	1	-1.15901e-13	8.18159e-16	7.83832e-16	1.21078e-14	1.42689e-15	-7.37625e-16	2.2953e-15	-4.96236e-17	-1.17751e-17	3.64187e-16	-3.59981e-16	-8.72356e-17	1.21956e-17	2.21624e-16	-7.14916e-18	-2.60524e-16	-6.38168e-16	3.15615e-16	-2.28589e-16	1.60898e-15
29	MEM20	0.00172361	-0.0665205	0.0615802	0.0353379	-0.140598	0.0963202	0.110532	-0.0444002	0.0483507	1.92565e-15	2.80163e-15	-1.07868e-16	2.31086e-16	1.74944e-16	-1.16994e-15	3.57668e-16	3.91101e-16	-1.64515e-15	-8.95222e-16	-3.8314e-15	8.88652e-16	3.7122e-15	-1.94951e-15	5.25632e-15	3.02323e-14	-4.07212e-14	1.91533e-14	-1.15901e-13	1	-9.07965e-15	1.21036e-14	3.27805e-14	2.59346e-15	4.68901e-17	-6.36507e-15	-7.94819e-17	3.94466e-16	4.98465e-15	-2.6494e-16	3.4275e-15	-2.03583e-15	-2.66979e-15	-4.80256e-15	-6.74755e-16	-3.755e-15	8.26675e-16	7.35779e-16	-9.11308e-16
30	MEM21	0.0379334	0.020751	-0.00109218	0.110319	-0.0244253	0.113612	-0.0231274	0.0621931	0.0390735	-8.32667e-17	-2.79238e-16	1.0545e-16	2.48118e-17	6.1609e-17	2.33925e-17	-5.63522e-17	-1.7978e-16	7.28584e-17	4.4104e-17	1.4456e-17	1.26162e-17	6.48681e-17	3.08045e-17	-1.29105e-16	3.44527e-16	1.02128e-15	1.07826e-15	8.18159e-16	-9.07965e-15	1	6.97359e-16	-4.85499e-15	1.39829e-16	4.17175e-16	-1.12074e-16	1.4067e-16	-2.58632e-17	-1.32995e-16	-3.11199e-17	-7.16165e-17	1.62223e-16	-2.97531e-17	-9.16775e-17	-7.2543e-18	2.4367e-16	1.45669e-15	2.13325e-16	2.02384e-17
31	MEM22	0.169952	-0.0391822	-0.0831336	0.0837486	-0.0355535	0.159148	-0.150088	0.0488662	-0.155477	-1.39409e-15	-4.28203e-15	8.93645e-18	6.50153e-16	3.17297e-16	1.1625e-15	-6.85794e-16	-7.51083e-16	9.47054e-16	1.09677e-15	-6.62756e-16	-1.96865e-17	-6.70234e-17	1.66901e-16	2.79658e-16	9.7759e-15	1.1239e-15	-1.64284e-15	7.83832e-16	1.21036e-14	6.97359e-16	1	-1.65408e-14	1.71979e-15	-1.07206e-15	-4.10635e-15	-7.72215e-17	3.73228e-18	-1.19854e-17	9.60721e-16	3.03172e-16	-2.99739e-16	-5.06907e-16	3.87974e-16	1.41864e-15	-1.00431e-15	9.4411e-17	-3.28477e-16	-2.3208e-15
32	MEM23	0.0582943	0.151522	0.0486829	-0.033979	0.0439583	0.0082199	-0.104072	0.0314383	0.134861	3.18874e-16	1.08121e-15	7.73266e-17	-8.67362e-18	9.35699e-18	4.28161e-16	-8.4481e-16	1.79465e-15	-1.273e-15	3.00262e-15	5.34932e-16	3.38685e-15	1.16899e-15	-7.92908e-15	9.53383e-15	2.58871e-14	9.22314e-15	-4.7769e-15	1.21078e-14	3.27805e-14	-4.85499e-15	-1.65408e-14	1	1.00586e-14	-4.05952e-15	-2.33449e-14	1.39729e-15	-1.34572e-15	-1.03308e-14	-2.62132e-15	-2.12787e-15	9.97834e-16	1.40013e-16	5.48367e-15	5.69936e-16	3.16836e-15	-1.24619e-15	2.73387e-15	2.3478e-15
33	MEM24	0.0462855	-0.121622	-0.0411575	0.093754	0.0149925	-0.0128912	0.164371	-0.0607262	0.0937178	-8.07435e-16	7.71269e-16	-1.38778e-16	3.62505e-16	-2.01859e-17	3.36431e-16	-2.8849e-16	-6.89684e-17	-4.4451e-16	1.51394e-17	-6.93889e-17	3.1961e-17	-4.96236e-17	-1.95971e-16	4.74368e-16	6.53097e-16	4.28109e-16	-6.76227e-16	1.42689e-15	2.59346e-15	1.39829e-16	1.71979e-15	1.00586e-14	1	-6.70339e-16	2.09815e-14	-5.18525e-16	-4.87825e-17	-1.93448e-16	-6.84638e-16	-2.12688e-16	1.00088e-16	1.43404e-16	1.38399e-15	6.44266e-16	1.06173e-15	-4.90769e-16	-2.05538e-16	-1.08751e-15
34	MEM25	-0.138312	0.0151145	0.0273232	0.15386	0.147441	0.165461	0.0861922	-0.080713	-0.125255	3.99512e-16	-7.8767e-16	-1.06396e-16	-1.11443e-16	5.80344e-17	-2.75874e-16	9.42007e-17	8.6631e-17	2.71458e-16	5.97165e-17	6.40796e-17	-5.67728e-18	-3.09096e-16	-6.18192e-17	-3.22974e-16	-2.60524e-15	9.5147e-17	-2.36553e-16	-7.37625e-16	4.68901e-17	4.17175e-16	-1.07206e-15	-4.05952e-15	-6.70339e-16	1	1.33294e-14	-1.74061e-15	-1.65272e-16	5.52588e-16	1.00929e-16	-4.03323e-17	1.05555e-16	-7.48559e-17	2.48581e-15	-2.04382e-16	-3.37272e-16	-1.13714e-15	1.15648e-18	-5.97165e-17
35	MEM26	-0.0519197	0.0763028	-0.126048	-0.0637488	0.00279194	-0.0560793	-0.107323	0.0479598	-0.20425	-9.75651e-17	9.80697e-16	-4.20539e-16	-3.5115e-16	-1.05471e-15	1.87455e-15	-1.30788e-15	1.26835e-15	5.41654e-16	-2.58169e-15	1.03526e-15	-2.83422e-15	3.78485e-17	3.44001e-16	1.63337e-15	-1.78981e-15	2.22802e-15	-2.0106e-15	2.2953e-15	-6.36507e-15	-1.12074e-16	-4.10635e-15	-2.33449e-14	2.09815e-14	1.33294e-14	1	-5.83624e-15	1.58207e-15	9.03066e-15	3.70915e-15	1.12392e-15	-5.03385e-16	2.52323e-18	-3.04155e-15	1.47357e-15	2.11937e-15	-1.42689e-15	1.16705e-15	2.79637e-15
36	MEM27	0.0407608	0.0591427	0.0679039	-0.125953	-0.0644995	-0.0422117	0.0406657	0.0415166	0.0968013	-7.19122e-17	-7.82203e-17	-4.49977e-17	2.31296e-17	5.88755e-18	-7.63278e-17	3.2802e-17	-1.6401e-17	1.56651e-17	-9.36751e-17	7.42251e-17	1.86089e-17	5.00441e-17	2.50221e-17	3.53253e-17	7.37205e-16	-3.02262e-17	7.14916e-18	-4.96236e-17	-7.94819e-17	1.4067e-16	-7.72215e-17	1.39729e-15	-5.18525e-16	-1.74061e-15	-5.83624e-15	1	-3.03989e-14	2.29465e-14	1.77383e-15	-1.35814e-14	7.31696e-15	-9.75987e-15	-4.22011e-15	-7.59073e-17	-2.46436e-16	-3.07046e-15	-8.99717e-16	-4.91715e-16
37	MEM28	-0.102948	0.0806447	0.0201066	0.0319263	0.109658	0.0423107	0.112941	0.140983	0.142078	2.85967e-17	1.37516e-16	9.6724e-17	3.2802e-17	-2.77556e-17	-3.7428e-17	2.94377e-17	4.03717e-17	-1.17751e-16	1.23008e-16	9.43584e-17	7.84305e-17	9.50418e-17	5.42495e-17	3.44842e-17	-7.47298e-16	-6.44476e-17	1.09761e-16	-1.17751e-17	3.94466e-16	-2.58632e-17	3.73228e-18	-1.34572e-15	-4.87825e-17	-1.65272e-16	1.58207e-15	-3.03989e-14	1	1.76118e-14	1.25321e-16	8.26162e-16	4.43585e-15	9.31284e-16	7.5697e-16	3.7428e-17	-4.02101e-16	2.6536e-16	-5.51432e-17	1.80201e-16
38	MEM29	-0.0903816	-0.117723	0.0421934	-0.0525938	-0.00218443	-0.000802638	-0.0430441	-0.0166971	0.0889921	1.27003e-16	4.90349e-16	1.54338e-16	-6.98095e-17	7.90613e-17	3.59561e-17	2.05223e-16	8.41078e-18	-1.96392e-16	3.95307e-17	1.75365e-16	-1.08289e-16	-4.92031e-16	-3.78485e-18	7.73792e-17	-6.37579e-15	-1.98915e-16	-5.17263e-16	3.64187e-16	4.98465e-15	-1.32995e-16	-1.19854e-17	-1.03308e-14	-1.93448e-16	5.52588e-16	9.03066e-15	2.29465e-14	1.76118e-14	1	-1.33227e-15	5.28565e-16	-2.31296e-16	6.22818e-16	4.84314e-15	-6.74545e-16	-2.73281e-15	9.11308e-16	1.4117e-16	1.24879e-15
39	MEM30	-0.00811005	-0.035421	-0.0813126	0.0882784	-0.0328973	-0.0170914	0.0540009	-0.103386	-0.0043821	-1.22125e-15	-2.02868e-15	-4.97918e-16	6.02212e-16	-7.40149e-17	-2.09849e-16	-1.85037e-17	1.61487e-16	1.07658e-15	-6.05576e-17	-5.08852e-17	1.04714e-16	6.72862e-18	-6.64452e-17	-6.72862e-17	-1.20442e-15	-9.16775e-17	-7.65381e-17	-3.59981e-16	-2.6494e-16	-3.11199e-17	9.60721e-16	-2.62132e-15	-6.84638e-16	1.00929e-16	3.70915e-15	1.77383e-15	1.25321e-16	-1.33227e-15	1	-2.9075e-16	3.54094e-16	1.53076e-15	2.48959e-15	3.61664e-15	4.4359e-16	1.79991e-16	2.8439e-17	-4.0582e-15
40	MEM31	-0.0410421	-0.0120561	-0.000404572	-0.075483	-0.0745032	-0.0324193	-0.044787	-0.0976855	-0.0232632	-2.57843e-16	-9.73548e-17	1.963e-16	4.14757e-17	3.60875e-17	4.99127e-17	5.94274e-17	1.18855e-16	1.7273e-16	-4.31578e-17	-3.96292e-17	-1.15648e-17	2.48959e-16	-6.94415e-17	1.36991e-16	-1.7879e-15	1.20944e-16	3.85845e-17	-8.72356e-17	3.4275e-15	-7.16165e-17	3.03172e-16	-2.12787e-15	-2.12688e-16	-4.03323e-17	1.12392e-15	-1.35814e-14	8.26162e-16	5.28565e-16	-2.9075e-16	1	-5.14543e-16	-3.20026e-14	-8.39284e-15	1.59424e-16	-1.79673e-15	-2.71907e-15	-2.86634e-16	6.71009e-16
41	MEM32	0.00720523	-0.0226086	0.040161	0.041192	0.0766674	0.15805	0.0453765	0.0207932	0.0215976	1.86719e-16	8.41078e-18	-7.99024e-17	-1.13966e-16	-8.74721e-17	2.7335e-18	8.41078e-18	1.99335e-16	-1.51394e-17	-6.05576e-17	7.09134e-17	-9.37802e-17	-7.52765e-17	-2.94377e-18	-1.58964e-16	1.1384e-15	-1.48555e-16	-1.02822e-16	1.21956e-17	-2.03583e-15	1.62223e-16	-2.99739e-16	9.97834e-16	1.00088e-16	1.05555e-16	-5.03385e-16	7.31696e-15	4.43585e-15	-2.31296e-16	3.54094e-16	-5.14543e-16	1	1.85689e-14	5.41255e-15	-1.77467e-16	1.14542e-15	1.53202e-15	1.37648e-16	-4.49346e-16
42	MEM33	-0.0149114	0.0597094	0.0421424	0.0372299	-0.138208	-0.135065	0.0271775	0.0712168	-0.111834	8.06594e-16	-2.0312e-16	-3.22133e-16	-2.56108e-16	-2.69986e-16	1.35098e-16	-4.87825e-17	-2.22045e-16	-6.94941e-16	1.81463e-16	7.9955e-17	2.74927e-16	-5.25674e-17	6.13987e-17	-2.04382e-16	6.0095e-16	-1.95708e-16	-2.32558e-16	2.21624e-16	-2.66979e-15	-2.97531e-17	-5.06907e-16	1.40013e-16	1.43404e-16	-7.48559e-17	2.52323e-18	-9.75987e-15	9.31284e-16	6.22818e-16	1.53076e-15	-3.20026e-14	1.85689e-14	1	3.49542e-14	5.03806e-16	4.55507e-15	5.78031e-16	7.21763e-16	-3.16319e-15
43	MEM34	-0.0708288	0.00158074	-0.0215033	0.0651631	-0.105252	0.207527	-0.0472023	-0.15159	0.109647	-5.88755e-16	2.75243e-16	2.86387e-16	1.81042e-16	-2.52323e-17	2.59683e-17	6.05576e-17	-1.58543e-16	4.32524e-16	1.80832e-17	5.49855e-17	-2.09534e-16	1.33626e-15	9.89318e-17	1.1733e-16	3.50162e-15	-1.68216e-17	-2.77451e-16	-7.14916e-18	-4.80256e-15	-9.16775e-17	3.87974e-16	5.48367e-15	1.38399e-15	2.48581e-15	-3.04155e-15	-4.22011e-15	7.5697e-16	4.84314e-15	2.48959e-15	-8.39284e-15	5.41255e-15	3.49542e-14	1	-1.24406e-15	-4.33076e-16	3.90891e-16	1.53142e-15	3.63503e-15
44	MEM35	0.013343	0.0431206	0.0331522	0.0300866	-0.0741121	0.0297718	0.0521495	0.0521774	-0.0235361	1.78477e-15	-3.33782e-15	1.54969e-16	-5.17684e-16	3.13302e-16	-4.8751e-16	-4.81517e-16	1.69057e-16	3.27705e-16	2.0249e-16	-3.46419e-17	2.67778e-16	3.93204e-17	7.47929e-16	-3.10358e-16	9.32756e-16	1.98337e-16	-3.99933e-16	-2.60524e-16	-6.74755e-16	-7.2543e-18	1.41864e-15	5.69936e-16	6.44266e-16	-2.04382e-16	1.47357e-15	-7.59073e-17	3.7428e-17	-6.74545e-16	3.61664e-15	1.59424e-16	-1.77467e-16	5.03806e-16	-1.24406e-15	1	-2.78143e-14	7.1397e-16	-5.75521e-16	-7.15842e-15
45	MEM36	-0.00451172	0.0619178	0.0143995	-0.0158459	0.150347	-0.10265	-0.0426307	0.153294	-0.0219275	-1.03779e-15	1.94311e-15	3.89261e-17	1.54377e-16	5.84576e-16	-1.06005e-15	1.44665e-15	-1.90026e-15	7.19385e-17	1.1748e-15	-2.50666e-16	2.03933e-15	2.81104e-16	-2.24987e-15	1.68933e-15	-9.79212e-16	8.80336e-16	-1.55577e-15	-6.38168e-16	-3.755e-15	2.4367e-16	-1.00431e-15	3.16836e-15	1.06173e-15	-3.37272e-16	2.11937e-15	-2.46436e-16	-4.02101e-16	-2.73281e-15	4.4359e-16	-1.79673e-15	1.14542e-15	4.55507e-15	-4.33076e-16	-2.78143e-14	1	-9.84925e-15	9.62713e-15	5.82301e-15
46	MEM37	0.0875459	0.0808452	-0.0489454	-0.0109451	-0.0231784	-0.0675506	-0.0802022	0.0317556	0.0465817	1.34572e-16	-2.12582e-16	1.20064e-16	-2.29194e-17	-3.61664e-17	-1.18802e-17	4.33155e-17	-1.85878e-16	3.94255e-17	6.52887e-17	-1.3615e-17	1.57702e-17	-3.65869e-17	-1.19223e-16	2.3382e-16	-8.5853e-16	-1.69687e-16	-1.78309e-16	3.15615e-16	8.26675e-16	1.45669e-15	9.4411e-17	-1.24619e-15	-4.90769e-16	-1.13714e-15	-1.42689e-15	-3.07046e-15	2.6536e-16	9.11308e-16	1.79991e-16	-2.71907e-15	1.53202e-15	5.78031e-16	3.90891e-16	7.1397e-16	-9.84925e-15	1	-1.08625e-14	5.40708e-16
47	MEM38	-0.00389066	-0.115748	-0.0297817	-0.0121165	-0.0237574	-0.0669998	-0.0675751	0.0527524	0.0653354	-5.73458e-16	5.8405e-16	-1.20511e-16	-1.24243e-16	-3.11199e-17	3.85187e-17	-5.04647e-17	-5.7351e-17	-1.29473e-16	3.81192e-16	7.7782e-16	4.38938e-18	6.4947e-17	1.10037e-16	1.89768e-17	1.40581e-15	7.07097e-17	7.4304e-17	-2.28589e-16	7.35779e-16	2.13325e-16	-3.28477e-16	2.73387e-15	-2.05538e-16	1.15648e-18	1.16705e-15	-8.99717e-16	-5.51432e-17	1.4117e-16	2.8439e-17	-2.86634e-16	1.37648e-16	7.21763e-16	1.53142e-15	-5.75521e-16	9.62713e-15	-1.08625e-14	1	-2.09735e-14
48	MEM39	0.00845739	-0.0468311	-0.0189208	0.0156789	0.00698067	0.0315272	0.0165492	-0.0780702	-0.0807773	1.59847e-15	3.86686e-16	1.14092e-15	-2.33757e-15	-1.53959e-15	-2.34062e-15	1.462e-15	1.61109e-15	1.13503e-15	-1.94562e-15	1.02354e-15	2.30576e-15	-1.30367e-16	-4.88982e-16	-1.81378e-15	2.09544e-15	3.0447e-16	5.87703e-17	1.60898e-15	-9.11308e-16	2.02384e-17	-2.3208e-15	2.3478e-15	-1.08751e-15	-5.97165e-17	2.79637e-15	-4.91715e-16	1.80201e-16	1.24879e-15	-4.0582e-15	6.71009e-16	-4.49346e-16	-3.16319e-15	3.63503e-15	-7.15842e-15	5.82301e-15	5.40708e-16	-2.09735e-14	1
49	MEM40	0.208919	-0.136353	-0.00771433	0.0639246	-0.124555	0.158134	-0.0826504	-0.137137	-0.0427376	6.28916e-16	1.80306e-16	-4.8362e-18	-5.9664e-17	-5.37239e-17	-1.24742e-16	4.16334e-17	-1.14492e-16	1.96208e-16	-9.35699e-18	3.7566e-17	1.25636e-16	3.13512e-16	6.43162e-17	2.54426e-17	-2.31034e-16	1.10453e-15	1.13585e-15	-5.40393e-16	6.28496e-16	-3.02481e-15	1.76626e-17	7.59907e-16	-1.25689e-15	-2.79911e-15	-1.42347e-15	1.4082e-15	9.50839e-16	2.74722e-15	6.46263e-16	-1.42166e-15	7.62858e-16	1.29565e-15	2.27911e-15	1.50542e-15	4.46874e-15	1.81207e-14	-6.5335e-16	-1.84053e-14
50	MEM41	0.0533821	0.0942783	-0.058122	0.00828957	-0.0338893	0.0053687	-0.06465	-0.0782965	0.0153579	-1.20569e-15	-1.27886e-15	6.41112e-16	3.32016e-16	4.39043e-16	1.90189e-16	-1.98915e-16	5.12217e-16	-4.95185e-16	-6.52571e-16	2.05906e-16	-3.52307e-16	1.11443e-16	-3.665e-16	4.24744e-17	9.80276e-16	6.67606e-18	-4.10026e-18	-5.35346e-16	-4.75104e-16	2.12898e-17	6.35855e-16	6.76463e-16	-4.00353e-16	2.48118e-17	1.64284e-15	4.49977e-16	2.56739e-16	4.81727e-16	-6.27444e-16	4.99232e-16	-2.44543e-16	-9.01636e-16	1.23418e-15	-2.44018e-16	3.33959e-15	-1.02727e-15	2.75939e-15	-1.27198e-14
51	MEM42	-0.0492784	-0.0188279	0.0418718	0.0288083	0.0973537	-0.0810294	0.127449	0.0693676	0.0250872	-2.69986e-16	-7.7048e-16	4.04769e-17	1.19959e-16	-6.99146e-17	1.71922e-16	-1.50343e-16	-1.91345e-17	-3.13012e-16	6.86004e-18	9.68554e-18	-7.7274e-18	5.25674e-19	1.66218e-16	-1.31418e-16	-3.9946e-16	-1.06594e-16	-1.72973e-16	-2.19259e-16	1.29702e-15	-1.61014e-16	-1.10398e-16	1.14435e-15	-1.54128e-16	-8.21628e-17	8.68781e-16	9.46134e-16	1.76364e-15	-1.74681e-16	5.16212e-17	6.81447e-16	6.01055e-16	-3.71178e-16	-1.3268e-16	-1.54732e-16	2.4781e-15	3.43943e-15	2.45158e-16	-7.19445e-15
52	MEM43	-0.0839793	-0.0311763	0.00255975	0.000620936	-0.0811314	0.0472506	0.0263473	-0.083411	0.0631133	4.12654e-16	1.06076e-15	9.2834e-17	-2.12267e-16	-6.83376e-18	1.44692e-17	1.54338e-16	1.29421e-16	3.53647e-16	-2.81761e-17	1.68255e-16	4.36441e-17	5.42495e-17	-1.20826e-16	2.29194e-16	1.40174e-15	-1.35361e-17	3.90576e-17	9.10467e-17	-8.0277e-16	-1.13427e-16	6.92904e-17	-1.03043e-15	-1.25636e-17	1.64536e-17	-6.13146e-16	5.83813e-16	-5.3461e-17	-5.4197e-17	2.7335e-17	1.39202e-16	1.91818e-16	-1.33547e-16	6.59418e-16	1.79518e-17	-2.29719e-15	5.58371e-16	1.01207e-16	1.11844e-14
53	MEM44	-0.0643603	-0.0347873	-0.0648436	0.0119641	-0.00235982	0.0218283	0.00731824	-0.0783118	0.0870145	-3.10358e-16	-8.96799e-16	-9.46213e-17	-2.62579e-32	8.45283e-17	1.2059e-16	-6.64452e-17	9.50418e-17	-3.84373e-16	1.91345e-17	2.027e-16	-7.1807e-17	-4.43669e-17	-8.74721e-17	-7.65381e-17	-9.3591e-16	-8.43181e-17	1.06817e-16	-5.59317e-17	-8.00811e-16	4.15808e-17	-7.94293e-17	-4.63671e-16	1.02191e-16	4.20539e-18	-3.62715e-16	1.66986e-15	2.73834e-15	-2.94588e-16	-8.6631e-17	8.05871e-16	7.1744e-16	8.35821e-16	1.71685e-16	5.80239e-16	-3.94636e-16	-1.76795e-15	2.68856e-16	-8.02767e-15
54	MEM45	-0.0201387	0.0609772	-0.065856	0.0169833	0.00428417	0.00521132	0.0239291	-0.0769407	-0.0742685	1.69898e-16	1.09761e-15	-2.64771e-15	-1.71496e-15	-1.26162e-15	1.74524e-16	8.52012e-16	-1.15901e-15	-3.09517e-16	2.26502e-15	-5.13583e-16	8.16056e-16	-1.43824e-16	1.75954e-15	-1.45002e-15	1.53076e-15	7.38046e-17	6.56041e-17	1.07027e-15	1.32091e-15	-2.16578e-17	-1.64893e-15	3.55093e-16	1.66197e-15	1.4803e-16	-1.9227e-15	5.53009e-16	5.13058e-17	-1.68384e-15	1.70402e-15	-1.21594e-15	8.54535e-16	4.88036e-15	-3.31847e-15	-6.06628e-15	7.80902e-16	3.88578e-16	-8.02614e-15	2.02443e-14
55	MEM46	-0.130063	0.0147195	0.0303782	0.0507955	0.1112	-0.00364378	0.00990777	-0.12474	-0.0770682	5.04647e-18	-4.20539e-16	-7.12814e-17	1.36255e-16	-1.68216e-16	6.27654e-17	2.77556e-17	1.52235e-16	-1.03453e-16	-5.04647e-17	-1.63695e-16	1.54443e-16	2.50873e-15	2.04172e-16	-3.53253e-17	2.09239e-15	-1.68132e-15	-1.02927e-15	-1.46348e-16	1.48555e-15	-7.77366e-16	-3.36326e-16	-1.01442e-15	-1.61823e-15	-2.85882e-15	-5.18525e-16	5.1516e-16	-4.24534e-16	-4.7134e-15	-1.12368e-15	1.51663e-15	-1.03053e-15	-2.73014e-15	-4.09763e-15	5.99058e-16	-7.95049e-16	3.11682e-15	-4.94233e-15	-5.35704e-15
56	MEM47	0.0211278	0.0193295	-0.00112083	-0.0202343	0.0542647	0.00366433	-0.0109936	0.0819412	-0.0181035	-5.71933e-17	-1.38357e-16	-2.7335e-17	-3.23815e-17	1.18592e-16	-2.6494e-17	1.68216e-18	-1.76626e-17	1.72421e-17	-1.10602e-16	-4.22116e-17	-8.83132e-18	-5.55112e-17	6.43425e-17	1.17751e-17	-4.37361e-17	1.44035e-16	4.18436e-17	7.10711e-17	1.0934e-17	-3.88999e-17	-2.31822e-17	2.928e-17	-8.15846e-17	2.52323e-18	-5.17263e-17	-5.01703e-16	1.12284e-16	-4.07923e-17	-1.68216e-17	1.90084e-16	-1.15228e-16	6.05576e-17	6.20295e-17	4.81517e-17	5.05567e-17	1.38147e-16	9.02845e-17	2.69145e-17
57	MEM48	-0.00516819	-0.0537266	0.0561316	0.064044	0.00487867	0.126003	0.100965	-0.0854992	0.00768165	7.73792e-17	-8.70516e-17	2.30666e-16	-2.07326e-16	1.42563e-16	6.17036e-16	-8.70516e-17	5.21468e-17	-1.11233e-16	-1.05976e-16	2.90645e-16	7.88511e-18	-1.53497e-17	5.65625e-17	2.93536e-16	-5.14529e-16	-2.70249e-16	2.21624e-16	1.8714e-16	-3.17717e-16	2.97531e-17	-1.10654e-16	1.14857e-15	1.16069e-16	-5.0675e-17	7.26691e-16	7.023e-17	5.36187e-17	-2.6494e-17	3.33908e-16	7.08214e-17	-1.03453e-16	-1.66954e-16	2.13003e-16	7.63068e-16	1.73613e-15	-3.72177e-17	2.84797e-16	4.84566e-15
58	MEM49	0.0766593	-0.0670807	-0.0471686	-0.0107745	0.0525469	-0.0086794	0.0369777	-0.133614	0.0102303	-2.69986e-16	-5.71092e-16	-1.52445e-16	-6.30809e-19	-4.62593e-18	-1.9082e-16	1.08079e-16	-3.39737e-32	2.36553e-17	-1.47189e-18	1.1344e-16	5.68779e-17	-5.63522e-17	1.11443e-17	-7.06506e-17	4.6806e-16	-8.64208e-17	-1.42983e-17	2.94377e-18	7.14811e-16	7.66958e-17	9.15724e-17	1.24288e-15	5.21468e-17	1.70108e-16	-1.45086e-16	1.47599e-15	-7.12603e-16	1.5602e-16	-6.13987e-17	7.01643e-17	3.55355e-17	7.31738e-17	-4.43038e-16	1.0934e-17	-2.06675e-16	-1.29537e-15	-3.87711e-16	-2.76925e-15
59	MEM50	0.0127988	0.0280709	0.00689504	-0.0360228	0.0559333	-0.109057	-0.021368	0.0812125	-0.0779269	3.45683e-16	8.3456e-16	-4.39463e-17	-8.3477e-17	1.47189e-16	1.57702e-16	-2.08798e-16	7.99024e-18	-1.24059e-17	1.46137e-17	1.69582e-16	-1.96865e-16	9.45161e-17	4.15282e-17	-1.51394e-17	1.33837e-16	3.32489e-17	-1.69372e-16	-1.25215e-16	-6.39745e-17	-9.61983e-18	9.08364e-17	-1.45531e-15	-1.91345e-17	9.77753e-17	8.09538e-17	2.97868e-15	-5.90857e-16	2.65991e-16	2.39707e-16	-8.75549e-16	4.10026e-17	-3.75226e-16	-2.02805e-16	-1.98179e-16	-8.52564e-16	-2.43944e-15	-7.99136e-16	2.0128e-15
60	MEM51	0.0293253	0.0747603	0.031684	0.0914079	0.0228281	0.00414358	0.0348686	0.0812301	0.00512409	-4.20539e-16	-1.03873e-15	9.73548e-17	-5.88755e-17	4.66798e-17	-1.208e-16	1.93868e-16	-3.44842e-17	-1.83145e-16	5.08852e-17	1.31997e-16	-1.6401e-17	-5.74036e-17	1.2469e-16	3.95307e-17	-9.01425e-16	-1.13808e-16	1.54548e-16	1.22167e-16	-9.82169e-16	6.26603e-17	-2.06169e-16	2.14685e-16	-3.82691e-17	1.20274e-16	5.8539e-16	7.74423e-16	-2.32348e-16	4.66798e-17	-2.08587e-16	5.58134e-17	-1.0892e-16	1.81673e-16	3.34959e-16	5.01072e-16	1.17779e-15	8.52643e-17	4.16675e-16	-8.92699e-16
61	MEM52	-0.0259032	-0.0431644	-0.0210122	0.0885066	0.0994416	0.0907963	0.0246952	-0.119962	-0.0166628	7.29425e-16	1.16237e-15	-1.27213e-17	4.93082e-17	9.84061e-17	3.03945e-16	-2.80079e-16	1.21326e-16	2.40128e-16	-1.73472e-18	-1.59437e-16	1.9697e-16	9.01005e-17	-9.46213e-19	-1.05135e-17	-5.98848e-16	-4.51291e-17	-1.83986e-17	-1.46242e-16	-7.99497e-16	1.12153e-16	1.83986e-16	1.58935e-15	1.26372e-16	-8.32667e-17	-3.13512e-16	7.9955e-17	-1.10707e-16	-6.65503e-17	1.89243e-16	1.00361e-16	-8.20051e-17	9.54624e-17	2.92695e-16	-8.29303e-16	-2.27295e-16	5.94222e-16	1.49962e-16	-1.86278e-15
62	MEM53	0.0476617	-0.0980634	0.0213844	-0.0801952	-0.0959188	-0.050293	0.00949876	0.0245057	-0.00373249	-4.35784e-17	-9.79856e-17	1.12231e-16	1.92029e-16	3.24078e-17	-7.95082e-19	6.22923e-18	9.91158e-17	-7.75369e-19	-8.38975e-17	-8.05759e-17	-2.50549e-17	1.43943e-16	-1.50343e-17	7.51714e-18	5.45649e-17	5.92467e-17	-1.13414e-17	8.23599e-17	1.44232e-16	-7.67812e-17	-3.89229e-17	1.0981e-16	3.86633e-17	-1.71107e-17	-1.30604e-16	-7.27533e-17	-6.22398e-17	9.32677e-17	3.17507e-17	7.86675e-17	2.6285e-16	9.05867e-17	-2.80513e-17	8.44232e-17	-1.36646e-16	2.34122e-17	-2.66451e-17	1.90557e-18
63	MEM54	-0.131412	0.0672291	-0.00460055	0.086282	0.0495673	0.0561536	0.0265321	-0.118208	-0.0221596	2.51482e-16	3.23815e-16	-5.63522e-17	3.91101e-17	3.36431e-17	2.70617e-16	4.2895e-17	1.19433e-16	6.1609e-17	-5.36187e-17	-8.10063e-17	8.6631e-17	8.579e-17	-5.10955e-17	6.56041e-17	-5.95063e-16	5.39341e-17	4.10026e-17	3.86896e-17	-6.07784e-16	-7.88511e-17	5.08852e-17	1.99125e-16	-4.58388e-17	7.77997e-17	2.98583e-17	1.13861e-15	1.05976e-16	3.32226e-17	-3.02788e-17	-4.04716e-16	-7.75895e-16	1.15017e-16	8.70516e-17	-1.49502e-16	3.5939e-16	-1.30472e-15	2.49038e-16	-1.45233e-15
64	MEM55	-0.082437	-0.0285883	0.0327415	-0.0418681	0.147532	-0.0350388	-0.0242754	0.172353	0.0264696	7.28374e-16	1.08499e-16	-2.54426e-16	3.2802e-16	4.39043e-16	7.59073e-17	-4.38202e-16	1.46348e-16	6.3943e-16	-5.42075e-16	2.24988e-16	4.46402e-16	-1.42563e-16	-1.77888e-16	-4.2895e-16	-1.04714e-16	-2.23832e-16	2.56949e-16	9.46213e-17	4.58177e-16	-1.85037e-17	-6.25552e-16	-1.12436e-15	3.26338e-16	-3.28862e-16	8.41078e-16	-5.99268e-16	3.00265e-16	-2.14475e-16	1.02107e-15	-1.90452e-16	-9.29391e-17	3.82691e-16	-7.21224e-16	-1.04714e-16	2.03258e-15	-3.49888e-16	8.70411e-16	-4.92851e-15
65	MEM56	0.0349943	0.0249457	0.0211965	0.0166937	0.0429597	-0.000953284	-0.022782	-0.103825	0.141011	-3.11199e-16	7.65381e-17	-6.1609e-17	1.58333e-16	-9.75651e-17	2.4181e-17	4.66798e-17	-4.20539e-18	5.97165e-17	1.29e-16	-1.9082e-17	-7.83254e-17	4.47874e-17	-3.63766e-17	2.19942e-16	-5.09062e-16	1.21588e-16	-4.6785e-17	6.95992e-17	-6.90525e-16	-3.38586e-16	2.15737e-16	5.95036e-16	5.67728e-17	4.09395e-16	-1.54548e-16	-6.34699e-16	2.53585e-16	-5.31982e-17	-2.45174e-16	2.21867e-16	3.61664e-17	-7.52765e-17	1.40145e-16	-2.72299e-17	-4.00051e-16	-1.9553e-15	-8.55534e-17	1.44192e-15
66	MEM57	-0.0475321	0.0178688	-0.0157354	0.0723492	-0.0333677	0.0611491	0.123645	-0.124698	-0.0309468	-6.05576e-17	1.82514e-16	-3.25918e-17	-1.34572e-16	-3.91101e-17	-9.35699e-17	1.35414e-16	-1.08499e-16	6.37117e-17	8.41078e-18	-5.81921e-17	-4.51028e-17	3.97409e-17	1.53497e-17	1.35414e-16	-4.21801e-16	4.10551e-17	-5.88755e-18	1.66113e-17	-2.42336e-16	-7.32789e-17	6.22923e-17	1.85379e-16	-2.39707e-17	1.26162e-17	-1.59384e-16	-9.32125e-16	-3.03419e-16	5.9296e-17	-2.65781e-16	-2.0291e-17	1.12074e-16	-1.07448e-16	-7.79049e-17	-7.00197e-17	-1.99625e-17	-3.54514e-16	1.144e-16	3.76277e-16
67	MEM58	-0.119891	-0.100185	0.000284036	-0.0287591	-0.00418485	-0.116453	-0.011099	0.00353709	0.0285306	-8.52853e-16	1.00362e-15	-1.12231e-16	-8.78927e-17	-1.57702e-18	-3.36024e-16	-8.67362e-17	-1.00719e-16	-1.25294e-16	1.25583e-16	-5.40688e-17	-3.17178e-17	-8.49226e-17	-5.33165e-17	1.56808e-16	-3.91206e-16	-5.04253e-17	-4.91111e-17	9.61457e-17	1.70233e-16	1.2741e-17	6.58406e-17	-3.52453e-16	-3.41425e-17	5.90594e-17	3.44027e-16	-2.61404e-16	-2.4315e-16	8.21628e-17	-1.36517e-16	3.87247e-16	8.86996e-16	1.27542e-16	-2.62771e-16	-3.85109e-16	9.21972e-16	3.212e-16	7.9288e-17	1.81673e-16
68	MEM59	-0.0407626	0.0637303	0.0254283	0.0498047	0.0280222	0.0532126	0.0844885	-0.029549	-0.00181057	6.20111e-16	-7.92098e-16	-2.89121e-19	1.02454e-16	-8.46335e-17	2.88069e-16	8.37661e-17	1.11969e-17	7.67549e-17	1.06383e-17	-3.41014e-17	-8.23994e-18	3.66132e-17	-5.58726e-17	-1.46426e-16	-1.77283e-16	-7.85225e-19	2.92077e-17	-9.39642e-17	-1.32953e-16	-1.62663e-17	1.98853e-17	4.37166e-16	6.55647e-17	-2.15395e-17	-3.91114e-16	-8.39626e-16	-5.15068e-16	-1.32575e-16	4.78363e-17	2.82358e-16	3.7127e-16	-1.84334e-16	-1.24867e-16	2.59532e-16	-6.52601e-16	-2.15658e-17	1.6805e-16	3.5462e-16
69	MEM60	0.0674926	-0.00365002	0.0107541	-0.00278053	-0.0227833	-0.00811897	0.0451655	0.0304464	-0.00518463	-4.06701e-16	7.31833e-16	6.4441e-17	-6.41125e-17	4.30001e-17	-2.78816e-16	-4.94199e-17	7.00263e-17	-2.31099e-17	8.53415e-17	-4.88922e-17	6.13133e-17	-4.13331e-16	1.06929e-16	4.86248e-17	1.00298e-15	1.32361e-16	9.22968e-17	-6.48123e-17	-2.04594e-16	5.36261e-17	-4.49164e-17	-2.50305e-16	3.16916e-17	-2.39346e-17	2.3084e-16	-6.94044e-16	3.66657e-18	-1.97818e-16	1.16463e-16	4.88212e-17	-1.60712e-16	-9.3225e-17	5.83797e-16	-7.82893e-17	2.65535e-17	-5.73173e-16	-5.36277e-16	-1.24513e-15
70	MEM61	0.0156571	0.0356968	-0.0180838	-0.0321328	-0.0441353	-0.00538652	-0.0568621	-0.0801906	-0.104384	-3.67867e-16	6.96202e-16	7.06506e-17	-8.06909e-17	-1.43719e-16	-7.79837e-17	1.3247e-17	4.32104e-17	1.82619e-16	-1.06212e-16	1.00936e-16	8.46335e-17	1.02138e-16	-2.09166e-16	2.35502e-16	-3.00423e-16	1.21536e-16	-3.00712e-16	1.0135e-16	-7.33394e-16	2.67305e-17	-2.73942e-16	1.1696e-15	-2.98583e-17	-3.50624e-17	-7.35207e-16	1.84985e-16	4.88351e-17	-2.6946e-16	1.73472e-16	-1.06679e-17	2.05013e-17	2.57896e-16	-3.41688e-16	-5.63706e-16	-1.87877e-15	3.54041e-16	-2.45526e-16	-2.37218e-15
71	MEM62	-0.121165	0.0599479	0.0135919	0.0213977	0.107919	-0.0183885	0.0283753	-0.00339746	-0.0543029	1.11969e-17	-7.47245e-17	-1.01192e-17	1.40854e-16	4.59965e-17	9.19798e-17	1.08289e-17	-4.19225e-17	-6.22004e-17	-5.44401e-17	-9.23773e-17	-1.55074e-18	-8.18343e-17	-1.24716e-17	-2.98583e-17	2.58842e-16	9.04027e-17	-5.20548e-17	3.85845e-17	-7.28715e-17	3.60317e-17	9.94213e-17	1.44297e-17	7.1991e-17	1.10812e-16	-2.44175e-17	-3.03905e-17	-5.88899e-16	-2.47527e-16	-8.51592e-17	1.72498e-16	2.43479e-16	2.6402e-17	8.06121e-17	7.83254e-18	1.72203e-17	2.48276e-16	3.75298e-17	6.88238e-17
72	MEM63	0.00872485	0.0865395	-0.0591185	-0.0115688	0.0829525	-0.0519247	-0.0299715	0.0843349	-0.0154709	-8.91543e-17	8.41078e-18	1.8714e-16	-5.17263e-17	-1.77467e-16	-1.73262e-16	4.48295e-16	1.85037e-17	-8.38975e-17	9.02056e-17	2.61786e-17	-1.54338e-16	-2.07326e-16	-1.26582e-16	4.71004e-17	-8.39816e-16	6.84427e-17	7.35943e-17	-1.3247e-16	1.07931e-15	5.81395e-17	-2.09113e-16	-5.66308e-16	1.32049e-16	6.56041e-17	-2.01859e-16	-3.19189e-16	-1.91766e-16	-4.20539e-17	3.1961e-17	9.63297e-17	2.51482e-16	1.54758e-16	-1.38778e-16	4.29791e-16	3.4818e-16	-5.02754e-16	1.7045e-16	-1.34972e-15
73	MEM64	-0.0386342	0.0982249	-0.00467192	0.0536417	-0.0946504	0.0432421	0.00966702	-0.0252851	-0.0642029	-1.8693e-16	-2.45963e-16	-7.04929e-17	1.46926e-16	-1.3247e-17	-1.59411e-16	8.20051e-17	-5.76138e-17	1.11522e-16	-4.38412e-17	-2.06984e-17	-6.70234e-17	-3.46156e-16	6.30809e-18	-1.21536e-16	7.3894e-16	-1.42094e-15	-1.77099e-15	4.80992e-16	-3.23789e-16	-9.81959e-17	7.82597e-17	-8.98836e-17	1.12978e-15	2.51798e-15	1.2438e-15	7.5513e-17	7.55919e-17	-5.66361e-16	-4.26847e-17	-7.30458e-16	4.47191e-16	-5.20575e-16	-2.42572e-16	4.87142e-16	1.24974e-15	3.45444e-15	1.36232e-16	-5.24622e-16
74	MEM65	0.0159183	0.00528148	-0.0882284	-0.153882	-0.0844542	-0.161637	-0.0627995	0.205448	0.00468864	-8.74721e-17	-5.3829e-17	-3.29703e-16	-5.21468e-17	-1.58123e-16	-9.58829e-17	1.21115e-16	4.03717e-17	2.04382e-16	6.39219e-17	5.97165e-17	-4.12128e-17	-1.51394e-16	1.17751e-17	-6.05576e-17	4.18857e-16	4.33155e-17	1.68216e-17	-1.41301e-16	-3.54935e-16	-4.75209e-17	-7.19122e-17	-3.00685e-17	1.31208e-16	5.71933e-17	2.11952e-16	-8.24256e-17	3.70074e-17	2.01859e-16	-3.49888e-16	-1.30735e-16	2.3382e-16	1.34572e-16	-2.40548e-16	8.24256e-17	2.54163e-16	3.36431e-18	1.33731e-16	2.09428e-16
75	MEM66	0.0824869	-0.0807212	0.00134125	-0.0102413	-0.088837	-0.0549962	0.00407525	-0.0981461	-0.0282507	6.05576e-17	-2.40548e-16	-4.20539e-18	1.17751e-17	-5.04647e-17	-1.26582e-16	-8.91543e-17	-9.42007e-17	-4.24744e-17	-6.56041e-17	-2.81761e-17	-9.6724e-17	1.93448e-17	1.76626e-16	1.95246e-33	6.21557e-16	5.17684e-16	8.09117e-16	-3.70074e-16	-9.80276e-16	-3.19231e-15	7.86408e-17	3.22028e-16	-1.68216e-18	7.31738e-17	2.59052e-16	-6.37537e-16	1.39619e-16	2.23727e-16	3.6671e-16	-1.13871e-15	4.58388e-16	-4.90349e-16	-2.72509e-16	2.04382e-16	9.91605e-16	3.24656e-15	8.43917e-16	4.66378e-16
76	MEM67	-0.0179987	0.0371332	0.0113471	0.00376144	-0.010638	-0.0534581	0.0689756	0.0752088	0.0620026	-1.95551e-17	1.33311e-16	-2.05013e-17	-1.32995e-16	-6.45527e-17	6.57092e-17	-7.38046e-17	1.80832e-17	2.01333e-17	6.52361e-17	-2.26828e-17	1.64431e-16	1.22692e-16	-2.53375e-17	5.27776e-17	-1.15175e-16	-7.32526e-17	-2.36553e-18	-1.52971e-17	6.28969e-17	-2.23937e-17	4.68113e-17	-3.46945e-17	-2.91223e-17	-9.17826e-17	1.35098e-16	1.0729e-16	1.89453e-16	-7.99024e-17	-3.67972e-17	-1.31632e-16	-6.30809e-19	-2.66517e-17	-1.74576e-16	-9.30443e-17	1.0591e-16	1.68794e-16	7.84437e-17	-9.20455e-17
77	MEM68	-0.141503	0.0676343	-0.0136549	0.0378468	0.0299306	-0.0118028	-0.0228742	0.0274061	0.0222115	1.47189e-17	-7.41621e-16	-9.93523e-17	1.91556e-16	8.22154e-17	-1.84511e-16	2.94588e-16	8.76824e-17	-2.35502e-17	-2.81288e-16	1.04333e-16	-7.43303e-17	9.46213e-19	-5.7351e-17	-1.68636e-16	-4.91715e-16	4.09763e-17	-1.43509e-17	-2.1027e-17	7.32132e-16	1.64799e-17	4.1155e-16	3.72874e-16	2.43913e-17	-9.50418e-17	-3.05942e-17	1.58018e-16	-1.19538e-16	-1.24059e-16	2.38656e-16	9.54295e-17	6.49733e-17	-9.78805e-17	1.41354e-16	4.59334e-16	-7.9862e-16	1.41669e-16	4.89402e-17	2.34193e-15
78	MEM69	0.107168	0.0759603	-0.00813142	0.0319062	-0.0116323	-0.0421652	0.0260012	0.0378326	0.029718	1.0177e-16	-2.29614e-16	6.20295e-17	-2.69145e-17	1.59805e-17	-5.9296e-17	-5.29879e-17	4.37361e-17	7.63278e-17	-1.42983e-17	7.63278e-17	-6.60246e-17	-2.9648e-17	4.20539e-18	3.1961e-17	-1.11863e-16	3.45368e-17	-1.30367e-17	-1.42983e-17	-2.24673e-16	-5.47752e-17	9.22557e-17	-7.50399e-17	3.06993e-17	8.53694e-17	-2.32138e-16	-5.0717e-16	1.30367e-16	2.51062e-16	6.13987e-17	-1.84774e-17	-5.31982e-17	1.82934e-16	-4.41566e-17	2.71248e-17	-1.60035e-16	2.17839e-16	-5.07275e-18	3.02998e-16
79	MEM70	-0.0542268	-0.0190929	-0.0213711	-0.0132297	-0.0358094	0.00863136	-0.101633	-0.0280794	0.026631	1.7158e-16	-4.47454e-16	9.6724e-17	8.04281e-18	-3.53253e-17	-2.60787e-16	1.25531e-16	4.47874e-17	1.50947e-16	-1.01402e-16	-3.07913e-16	1.46348e-16	-1.11969e-17	-1.64168e-16	1.167e-16	5.05067e-16	-2.35541e-16	2.90435e-16	-2.42283e-16	-1.37611e-15	9.98255e-17	3.43528e-17	-8.10832e-16	3.81639e-17	1.68794e-16	-5.33454e-16	-2.2604e-18	8.06909e-17	6.16195e-16	4.68901e-17	1.54243e-16	-3.24341e-17	-1.48398e-16	-3.15615e-16	-1.8551e-16	-3.76e-16	-3.13801e-16	4.94468e-16	8.38581e-16
80	MEM71	-0.0746143	0.013025	0.0181194	-0.000422512	0.00467283	0.0304324	0.0929966	0.0194804	-0.039217	-7.73476e-16	4.75472e-16	-1.63485e-16	2.23464e-16	-7.60124e-17	3.01211e-16	-2.96953e-16	3.24866e-17	-3.79484e-16	4.88877e-17	-7.33972e-17	-2.05972e-16	1.08814e-17	1.01981e-16	-2.02279e-16	-2.66017e-16	3.42082e-17	-7.42251e-17	-2.8644e-16	-3.66132e-16	6.32123e-18	-1.41275e-18	2.72332e-17	-1.62696e-16	-3.64818e-17	-1.72999e-16	2.77293e-17	2.57054e-17	-4.21065e-17	1.3615e-16	1.33115e-16	-9.61457e-17	7.66695e-17	-5.33559e-18	6.56041e-17	-6.52922e-16	-5.9664e-18	-1.17186e-16	5.56636e-16
81	MEM72	0.0112913	0.0655511	-0.00688111	-0.0252988	-0.0439821	-0.0965199	-0.0464415	0.0703789	-0.0408906	-1.34888e-16	6.07153e-17	5.41444e-18	2.1027e-17	-1.51079e-16	-6.94941e-17	1.17751e-16	-8.01127e-17	-6.337e-17	4.05032e-17	-8.59477e-17	3.51939e-17	7.412e-17	-3.92153e-17	-8.78927e-17	-5.41444e-18	-4.61542e-17	-5.65099e-17	3.33277e-17	-7.64855e-17	4.56153e-17	-5.64442e-17	1.02572e-17	4.26847e-17	6.4395e-17	-1.43246e-16	1.30577e-16	5.83498e-17	1.73472e-17	2.22886e-17	-4.63661e-17	3.80588e-17	-1.29947e-16	3.18033e-17	2.21834e-17	8.34704e-17	-2.30245e-17	-6.16977e-17	-2.70985e-17
82	MEM73	-0.0287536	-0.0370864	0.00183411	0.0234903	0.0162846	-0.0612636	0.0820172	-0.0292801	-0.0141081	5.36608e-16	2.12793e-16	-2.36343e-16	8.0323e-17	4.02876e-16	-2.30245e-16	-1.87981e-16	1.17751e-17	3.28441e-16	-9.18878e-17	-9.56726e-18	1.62328e-16	1.80832e-17	2.82392e-16	1.43824e-16	-4.57126e-16	5.24622e-17	-2.15737e-16	4.62593e-17	-5.9685e-16	-2.59683e-17	-1.3615e-17	3.71573e-16	-2.12372e-16	-3.49047e-17	2.51903e-16	-5.04647e-17	-5.67728e-17	-2.52323e-17	-3.46524e-16	3.74411e-17	-1.58964e-16	-3.03209e-16	2.5779e-16	-4.06451e-16	-8.64168e-16	-3.99512e-17	-2.31927e-16	-6.82745e-16
83	MEM74	0.0238387	0.0411621	0.0121927	-0.00843425	-0.00257228	0.0401578	0.0324285	0.034742	0.0459801	-2.90908e-16	-4.3531e-16	-2.13686e-17	-1.47399e-16	-2.82602e-16	6.74045e-16	-6.26761e-16	1.09109e-15	-1.34599e-16	3.35643e-16	-2.52304e-16	1.92002e-16	-3.97147e-17	3.89156e-16	-5.73405e-16	-9.31888e-16	-3.76836e-16	2.78423e-16	-2.2328e-16	1.64917e-16	-1.08617e-17	5.66919e-16	1.60992e-15	-2.68199e-16	-1.78624e-16	1.47483e-15	-1.3289e-16	-4.08186e-17	-9.06262e-17	3.4337e-16	-1.35277e-16	5.90332e-17	4.07791e-16	-2.3152e-16	-7.31449e-16	-1.24094e-15	1.88717e-16	-8.51711e-16	-6.24408e-16
84	MEM75	-0.0605384	-0.0162079	-0.0115618	0.00598885	0.0704618	-0.0290925	-0.0302373	0.0644483	-0.0242475	-2.07904e-16	-3.02157e-16	3.7428e-17	-1.3678e-16	-8.8576e-17	1.44383e-16	9.01268e-17	2.55477e-17	1.38522e-16	3.63766e-17	4.23167e-17	1.31287e-17	1.54824e-16	1.35676e-16	-8.60528e-17	-2.09573e-16	3.9026e-16	3.48285e-16	-1.4753e-16	-2.5829e-16	9.95725e-17	-1.69628e-17	2.03403e-16	-1.15149e-16	-1.76495e-16	2.237e-16	2.76715e-16	-3.43922e-17	-8.18211e-17	-1.25163e-16	-1.1611e-16	7.67747e-17	1.47491e-16	-1.73873e-16	-1.51525e-17	-2.99079e-16	-2.15789e-17	1.1175e-16	-2.29522e-17
85	MEM76	0.0248011	0.0065136	-0.00478667	0.0349368	-0.100085	0.0631064	0.0305488	0.0397389	0.00338334	1.6422e-16	8.29513e-17	-6.27129e-17	-6.21872e-17	5.98217e-17	-5.47752e-17	1.89243e-18	-4.17385e-17	-5.15423e-17	-6.66817e-17	-7.55262e-17	-1.03216e-16	-1.05187e-16	1.63274e-16	-4.64696e-17	3.20661e-17	-3.18953e-17	-1.52971e-17	-1.15123e-16	1.44692e-16	-1.61513e-17	-3.98198e-18	4.64696e-17	7.70638e-17	1.66376e-16	-2.498e-16	7.41463e-17	1.50448e-16	1.73262e-16	-2.16578e-17	3.72473e-17	1.26845e-16	-1.249e-16	4.65484e-17	3.24866e-17	1.02552e-16	-3.21949e-16	-2.42336e-17	1.63327e-16
86	MEM77	0.00090234	0.0637617	0.0110317	0.0293375	-0.0252611	0.0188551	-0.00516085	0.0895749	-0.00488945	2.52323e-18	-1.67164e-17	-2.67042e-17	2.63888e-17	5.90857e-17	-7.43828e-17	7.50662e-17	-2.56529e-17	-4.16859e-17	-1.33521e-17	-3.62715e-18	7.93767e-18	4.64696e-17	1.42983e-17	-6.93889e-17	-4.8362e-17	3.73491e-17	-1.27844e-16	2.97531e-17	-2.68619e-17	1.00404e-17	-1.00272e-17	-6.00451e-17	-5.84549e-17	2.29194e-17	6.30809e-17	1.45874e-16	2.31296e-16	2.4181e-18	-2.88069e-17	1.2925e-17	-3.43791e-17	6.32911e-17	-5.51957e-18	2.6494e-17	1.52774e-18	-2.33925e-17	-1.77546e-17	7.09134e-17
87	MEM78	0.0553011	-0.0320194	0.00437319	-0.00833576	0.040969	0.129174	0.000297953	-0.0540068	-0.111219	-7.74107e-16	-8.46755e-16	-1.44665e-16	-1.93974e-17	5.81395e-17	2.31796e-16	-2.74402e-17	-7.55393e-17	4.72975e-16	1.27371e-16	-3.90378e-17	2.04881e-17	2.71773e-17	1.13808e-17	-4.4472e-17	5.53324e-16	9.93392e-17	-9.72496e-18	-6.77331e-17	1.38791e-16	1.4916e-18	-5.87178e-17	-4.46586e-16	-5.04647e-18	-1.31418e-17	-1.94289e-16	-2.21913e-16	9.2282e-17	2.16578e-17	-3.75331e-17	-2.6443e-17	5.85863e-17	-2.77819e-17	-4.00563e-17	-1.63853e-16	-2.06268e-16	2.79658e-17	2.04126e-17	-1.24409e-15
88	MEM79	-0.0700913	0.00280278	-0.00523688	0.0170081	-0.0204297	-0.00975473	-0.0221542	-0.0504473	-0.0453527	-1.40828e-16	-1.87284e-16	-1.19026e-16	1.37332e-17	-2.35502e-17	1.74195e-17	-1.853e-18	-2.07773e-17	1.11564e-16	-8.38088e-17	-2.11863e-17	-1.26786e-17	-6.6846e-17	-7.76683e-18	-1.38252e-17	-5.70685e-17	1.11118e-16	-7.51385e-18	3.80194e-17	2.33432e-16	2.67535e-17	-5.62471e-18	-6.47244e-17	5.74299e-17	1.02375e-17	-1.63156e-16	4.81879e-16	1.85589e-16	1.1827e-16	4.07397e-18	-2.0288e-16	-1.6493e-16	-3.35708e-17	5.59908e-17	-8.31517e-17	1.78841e-16	-1.23369e-16	1.07091e-16	-2.43413e-16
89	MEM80	0.0534919	-0.0299182	-0.00998012	0.00585884	-0.0314808	0.120135	-0.0176213	-0.0341186	-0.0154429	2.11952e-16	6.72862e-17	-3.73228e-17	-2.79658e-17	1.11443e-17	-3.59561e-17	-2.98583e-17	1.20064e-16	-1.22324e-16	4.17385e-17	3.45814e-16	3.25655e-17	1.11127e-16	9.62509e-17	-1.18592e-16	9.73127e-16	-2.63625e-16	8.36873e-17	2.36028e-17	-7.25955e-17	5.81921e-17	7.53028e-17	-5.65034e-16	1.45086e-17	6.38168e-17	1.98915e-16	-1.22587e-16	-5.25674e-19	2.37499e-16	4.8362e-17	1.92594e-17	-1.10076e-16	-3.59719e-16	-1.05871e-16	5.3829e-17	-7.68939e-16	-2.19627e-16	-1.49659e-16	1.17698e-16
90	MEM81	-0.0415445	-0.0267315	0.013117	-0.0628313	0.053508	0.0298941	0.0578445	0.0125058	0.0327509	-1.20695e-16	-2.03961e-17	1.78203e-17	-3.0016e-17	-1.60856e-17	5.81658e-17	3.67972e-17	-5.76138e-17	1.6493e-16	2.42336e-17	1.44863e-16	1.41617e-16	7.4488e-17	-1.81883e-16	-6.7076e-17	-3.83584e-16	-8.25834e-17	-7.72215e-17	-1.77099e-16	-1.14071e-16	-8.77481e-17	1.31418e-20	2.70052e-16	4.38412e-17	1.2511e-16	3.31174e-17	-3.23973e-16	8.84709e-17	7.801e-17	-3.78485e-18	8.76807e-17	-7.88511e-19	9.17301e-17	6.78382e-17	-8.78927e-17	2.43569e-16	2.39655e-16	-3.15404e-18	6.53938e-17
91	MEM82	0.0454279	0.0131507	-0.0105879	-0.0495738	-0.031082	0.0479488	-0.0190117	-0.0180498	-0.022585	2.20783e-17	9.26237e-17	-7.0966e-17	-5.00441e-17	-3.97409e-17	7.15442e-17	-1.78729e-18	-1.44665e-16	-4.52079e-18	5.87703e-17	-6.08073e-17	-5.02018e-17	-1.30945e-16	-1.89243e-18	1.63379e-16	-8.41604e-17	-1.10917e-17	-1.54022e-17	-1.45612e-16	-1.3841e-16	1.25873e-16	-5.91514e-17	2.60898e-16	3.01737e-17	-1.4046e-16	6.07679e-17	-3.68497e-16	3.49888e-16	-3.70074e-17	-5.86652e-17	2.83466e-16	5.15791e-16	1.34205e-16	-1.81568e-16	2.08692e-17	1.01417e-16	-1.82409e-17	-1.68577e-17	5.8744e-17
92	MEM83	0.0490366	0.043168	0.00320559	-0.0795052	0.00525445	-0.046636	-0.0728239	0.0577025	-0.00190321	7.51503e-16	3.1225e-17	9.64086e-17	-6.26498e-16	5.42075e-16	7.53816e-17	-3.71756e-16	-2.35292e-16	-4.98602e-16	-4.52658e-16	1.37293e-16	1.90294e-17	-3.14353e-17	-3.05101e-16	-4.39884e-16	5.53534e-17	7.69849e-17	-2.78975e-16	-5.95746e-16	-8.63156e-17	9.19929e-18	5.75337e-16	5.26068e-17	1.10002e-15	-5.75613e-16	6.66449e-16	1.31576e-16	-1.208e-16	-9.88267e-18	1.91766e-16	1.96349e-16	-1.36044e-16	-4.56916e-16	5.17526e-16	-1.53428e-15	9.17086e-16	-2.47645e-16	2.21959e-16	8.78401e-17
93	MEM84	0.0362624	-0.0646246	-0.00826272	0.0191797	-0.0379805	-0.0359922	-0.0209968	0.0347592	0.142373	8.29776e-17	-6.57881e-16	-1.37293e-16	-4.81911e-17	1.18539e-16	-1.29368e-16	4.10288e-17	2.03961e-17	-2.12694e-16	-7.96461e-17	3.6807e-17	1.28869e-16	-7.80902e-16	-1.55967e-16	-8.10589e-17	-7.74449e-16	4.99689e-16	2.73955e-16	1.37306e-16	-4.64131e-16	2.08873e-16	4.15841e-17	8.77967e-16	4.39752e-16	7.88379e-16	-1.73183e-16	5.81395e-17	1.23625e-16	1.0329e-15	3.90944e-16	-2.86029e-16	8.29645e-17	5.6205e-16	8.99283e-16	-7.7642e-17	2.41625e-16	-7.03529e-16	4.4109e-16	-3.38422e-16
94	MEM85	-0.0224941	0.0392753	0.00634465	-0.120107	-0.00562615	-0.0873527	-0.0694162	0.119262	-0.00602917	3.78485e-18	6.7076e-16	7.95975e-16	3.01947e-16	-1.65482e-16	2.71668e-16	-3.01947e-16	-1.36044e-16	4.96236e-16	-4.18594e-16	2.06734e-16	3.70442e-16	1.41091e-16	-6.56987e-16	-2.94377e-18	-1.03673e-15	-4.42407e-16	5.43967e-16	-2.56739e-16	9.68291e-17	2.62837e-17	5.54402e-16	-2.2027e-16	-7.48559e-17	4.73106e-17	-6.4006e-16	9.23609e-17	-3.33277e-17	2.59157e-16	-4.48715e-16	8.41308e-17	1.45086e-17	-4.37466e-16	5.13899e-16	1.08709e-16	-4.64659e-16	1.57334e-16	-2.4842e-16	6.23029e-16
95	MEM86	0.000240194	-0.00595354	0.0265123	-0.0137806	0.11723	-0.0498542	0.0698252	0.0232595	-0.00797571	1.74524e-17	1.17725e-16	5.26988e-18	5.69699e-17	-1.49817e-17	4.59833e-17	-7.88511e-19	-8.3109e-17	-1.59673e-18	-1.72158e-17	-5.12138e-17	2.78936e-17	-4.92819e-17	-4.16991e-17	-3.98986e-17	-1.93763e-16	-9.81236e-17	4.13442e-17	-5.00704e-17	-1.45257e-16	1.20971e-17	7.96724e-18	2.62701e-16	4.43669e-17	1.88743e-16	-4.6969e-17	2.86492e-18	-9.50155e-17	-4.79152e-17	-6.41322e-17	3.57208e-17	-3.73228e-17	1.89098e-16	2.70571e-16	1.487e-17	1.49817e-16	2.65045e-16	4.8233e-17	1.02901e-16
96	MEM87	0.0296488	-0.0545054	-0.00627117	0.146596	0.00974333	0.0085762	0.0248257	0.00820029	0.0639847	7.61701e-17	4.2067e-16	-5.57214e-17	2.11518e-17	4.51422e-17	-1.42196e-16	-8.11115e-17	1.47373e-16	9.64119e-17	-2.22804e-16	5.71473e-17	-6.11129e-17	-1.39244e-16	5.536e-18	-2.03002e-16	3.54107e-17	-3.73089e-17	1.33156e-16	3.70469e-17	3.43101e-16	-4.25566e-17	2.75658e-17	5.41897e-16	-6.51638e-17	9.1142e-17	-4.31907e-17	-5.53107e-17	1.16601e-17	-1.0911e-16	-7.99156e-17	-2.2945e-17	-1.38614e-17	-7.11729e-17	-3.37138e-17	1.68971e-16	8.32286e-16	-1.67476e-17	2.02409e-16	6.52953e-17
97	MEM88	0.00213143	-0.0630978	-0.018718	-0.0346904	0.0142727	-0.039697	-0.0159926	-0.0241906	-0.0265989	5.71933e-17	8.10326e-17	-3.71389e-17	-8.93645e-18	4.65747e-17	-6.01699e-17	-8.14794e-19	-3.90576e-17	1.60068e-17	4.38412e-17	8.74754e-17	9.13358e-18	-4.59307e-17	-2.62837e-18	-2.99634e-18	1.90425e-17	6.92641e-17	4.33024e-17	-4.57336e-18	-1.48437e-17	1.22942e-16	3.20694e-17	4.39463e-17	2.49169e-17	8.50803e-17	-7.85882e-18	1.69175e-16	5.0031e-17	9.03896e-17	1.96076e-17	-6.63515e-17	8.10326e-17	-7.11499e-17	-7.73529e-17	6.15827e-17	1.37654e-16	-5.01493e-17	-8.91346e-18	-1.14203e-17
98	MEM89	-0.0373564	0.0765255	0.00175208	-0.0421599	-0.00974337	-0.025813	0.0165899	0.0316823	0.0222994	3.20346e-16	2.08022e-16	-3.65784e-16	5.94018e-16	3.99735e-16	4.40416e-16	-3.71402e-16	-2.28734e-16	-3.35708e-17	3.50756e-16	-1.89891e-16	-2.62157e-16	-2.04356e-17	1.64207e-16	2.43834e-16	4.20953e-16	1.95912e-16	-1.32595e-16	-2.6971e-16	-4.38018e-17	7.86638e-17	7.40919e-16	-1.07228e-15	-6.16353e-18	5.76861e-17	1.43246e-18	7.83451e-17	-1.31911e-16	2.47198e-17	2.41416e-16	-3.22474e-17	1.26175e-16	2.92117e-16	-3.21045e-16	2.29647e-16	-8.69485e-17	-1.30101e-16	2.40233e-16	-8.63459e-16
99	MEM90	0.0888524	0.00742748	-0.00518921	-0.0919853	-0.0550349	-0.00397192	-0.0491736	0.0501814	-0.0144829	-2.75453e-17	-3.31174e-17	2.89121e-18	-3.73228e-18	1.49607e-16	3.44316e-17	-5.36187e-17	-4.58388e-17	1.23271e-17	4.0214e-17	-8.61645e-17	-3.6876e-17	-1.36202e-16	1.23507e-16	-1.18802e-17	-3.89787e-17	9.60932e-17	1.49764e-16	-3.09622e-17	4.16071e-17	5.902e-17	-1.1618e-16	4.87694e-17	6.86004e-17	-7.68535e-17	-1.07816e-16	-1.82172e-16	5.70356e-17	-1.6401e-17	-5.88755e-18	8.65949e-17	9.75125e-17	2.90435e-17	-7.801e-17	-2.61786e-17	5.70504e-17	-7.47245e-17	-1.89735e-17	7.75895e-17
100	MEM91	0.0491625	-0.0217367	0.0108435	0.048906	0.0218824	-0.0176072	-0.0462047	0.0422561	0.0286327	4.27373e-16	-2.97426e-16	2.78607e-18	-3.80588e-17	-1.53497e-17	1.02244e-16	-2.13318e-16	-1.15859e-16	-2.6239e-16	8.41078e-18	3.16521e-17	-4.25796e-18	6.25552e-18	-1.1281e-16	-2.13424e-16	-2.46278e-16	1.03952e-16	-9.2466e-17	-3.77434e-16	8.90491e-17	-4.39595e-17	-1.09196e-16	2.00669e-16	-6.19244e-17	-2.01333e-17	-8.20051e-17	-1.13703e-16	1.41617e-16	-1.50868e-17	-3.19399e-16	-3.31142e-17	1.29526e-16	1.67637e-16	-1.01718e-16	2.39339e-16	-3.16559e-16	1.17987e-16	-4.56548e-17	-1.1578e-16
101	MEM92	0.0296513	0.0616749	-0.00459749	-0.0987837	0.103058	-0.0725684	-0.0628259	-0.0103772	-0.0168123	2.83391e-16	-2.75059e-16	8.75904e-17	-5.15949e-17	-5.66151e-17	1.45093e-16	-1.8438e-17	-2.60997e-17	-2.51601e-17	-1.46913e-16	4.29558e-17	-3.59561e-17	2.41284e-17	-3.99775e-17	-5.95063e-17	1.05463e-17	-6.51671e-17	2.62837e-18	-2.67502e-17	2.32177e-16	-3.40867e-17	-3.52842e-17	3.66057e-16	3.98198e-18	1.15727e-16	-1.59516e-16	-5.57418e-16	2.59788e-16	-2.90882e-16	-4.93345e-17	3.42986e-16	-1.41525e-16	9.01071e-17	-9.17301e-18	-6.52295e-17	3.60731e-16	-8.76561e-17	1.87271e-17	4.52211e-17
102	MEM93	-0.0280175	-0.0125111	-0.000634736	-0.0827813	-0.0373625	-0.0825621	-0.107768	0.0107307	-0.00203901	1.89032e-16	-2.87649e-16	3.67446e-17	-4.07397e-17	-3.09096e-17	5.55637e-17	7.5697e-18	3.72177e-17	-1.12415e-16	-2.30508e-17	-1.15123e-16	-2.73088e-17	9.01005e-17	-1.51394e-17	4.58388e-17	2.07431e-16	-6.13724e-18	3.20661e-17	-9.49367e-17	-5.15686e-17	3.71783e-17	-4.58913e-17	-7.97447e-17	2.38656e-17	1.47662e-16	9.6724e-17	-2.31296e-16	3.22501e-16	4.84671e-17	-2.94377e-18	-5.27842e-17	5.62471e-18	8.14269e-17	-4.59439e-17	-8.58425e-17	4.70593e-16	1.14755e-16	-2.50352e-17	2.94036e-16
103	MEM94	0.00812643	-0.0273116	-0.00169402	-0.0418199	-0.024175	-0.0176596	0.012138	-0.00338874	0.0294001	-1.6154e-16	4.30343e-16	-1.20116e-17	8.45415e-17	4.52079e-17	-7.72609e-17	3.23552e-17	-6.1609e-17	2.86427e-17	-5.64705e-17	-1.88388e-17	-8.95025e-17	3.62846e-17	9.34254e-17	-9.83536e-17	-3.71638e-16	-4.54215e-17	6.43162e-17	-1.97128e-18	2.56351e-16	-9.75125e-18	2.11419e-17	4.19558e-16	5.33559e-18	7.51188e-17	2.82024e-17	7.29372e-17	8.08223e-17	-1.68505e-16	2.47592e-17	6.38718e-17	-4.41566e-18	-1.37648e-16	-5.05501e-17	3.76777e-17	-3.57738e-16	-1.22121e-16	1.136e-16	-4.25428e-16
104	MEM95	0.0653369	-0.0291125	-0.0157162	0.0143148	0.0292489	-0.00820723	0.00421611	-0.0461329	0.0168616	-1.36255e-16	3.3354e-16	4.94133e-18	6.45002e-17	2.8439e-17	1.04083e-17	2.38656e-17	1.06712e-17	3.15404e-19	-3.85056e-18	-1.33909e-16	-1.06449e-18	1.1302e-16	-9.5147e-18	-7.70638e-17	-1.65508e-16	1.29855e-16	-1.96076e-17	4.51817e-17	2.90316e-16	-2.57514e-17	-1.02099e-16	3.95349e-16	6.29232e-17	1.10891e-16	-1.22903e-16	-1.7568e-16	9.654e-17	-4.84146e-17	-9.63034e-17	8.90606e-18	2.00545e-17	-3.60612e-17	-8.81818e-17	6.37117e-17	-6.31975e-17	9.19009e-17	6.53035e-17	-4.43182e-16
105	MEM96	-0.00256274	-0.0228172	-0.0205145	-0.0176698	-0.0237055	-0.0463714	-0.000753939	0.00323717	0.0353586	-1.63169e-16	5.67307e-16	-2.28668e-17	9.22032e-17	3.50099e-17	2.03699e-17	-6.83376e-17	-5.05698e-17	8.26622e-17	-1.00036e-16	-2.20652e-17	-1.50974e-16	-1.05135e-17	-4.12128e-17	-9.02056e-17	5.45597e-16	8.48437e-17	-9.66188e-17	9.90895e-17	-1.5807e-16	-2.66648e-17	5.9296e-17	-1.70732e-16	4.39463e-17	4.98339e-17	-3.95412e-16	-8.83132e-18	-1.06712e-17	3.29072e-17	-4.20539e-19	5.36352e-17	-7.30687e-18	-1.33784e-16	1.90294e-17	6.66029e-17	7.48988e-16	6.36065e-18	1.07435e-18	-7.49637e-16
106	MEM97	-0.0720502	-0.00770687	0.0124612	0.0500804	0.0597838	-0.0327736	0.0321378	0.0533718	0.068477	-3.76382e-17	1.3226e-16	2.39707e-17	1.44035e-16	-8.55797e-17	4.93082e-17	-2.94377e-17	-6.26603e-17	3.36431e-17	1.10234e-16	1.10654e-17	7.50136e-17	5.72984e-17	-8.579e-17	7.86408e-17	5.36187e-18	-1.95025e-17	1.22167e-16	6.56041e-17	1.19486e-16	-1.72947e-17	2.20126e-16	-2.13266e-16	-6.87581e-17	2.94377e-17	1.11022e-16	2.55477e-17	3.84793e-16	1.71685e-16	2.98583e-17	-9.96218e-17	-9.76702e-17	-2.35186e-16	1.31944e-17	-1.10391e-17	2.24778e-16	-2.24515e-16	6.01042e-17	-2.36448e-16
107	MEM98	-0.0446868	-0.0227139	0.0104839	0.0126105	-0.00223427	-0.0553633	-0.0489625	0.000516541	0.0444515	-9.65137e-17	2.21309e-16	3.44842e-17	1.39829e-17	-4.41566e-18	4.80466e-17	-1.00719e-16	3.00685e-17	7.28584e-17	8.41078e-18	5.54849e-17	5.55374e-17	-2.32348e-17	2.4549e-17	-9.39905e-17	-5.21468e-17	1.08473e-16	1.30315e-16	-9.63034e-17	-5.17526e-17	9.75651e-17	3.04628e-17	-1.97942e-16	4.96236e-17	6.93889e-17	1.31313e-16	1.23586e-16	-2.69145e-16	-6.02422e-17	-3.36431e-17	7.28495e-16	-4.04559e-16	5.28092e-16	2.8255e-16	-6.42373e-17	1.94532e-17	-1.99283e-16	-2.47067e-17	-3.84399e-16
108	MEM99	-0.0134848	-0.0178771	-0.00335144	0.0112042	0.0618449	-0.00409189	-0.00348714	-0.0291156	0.00638523	-1.34572e-17	4.85723e-17	1.167e-17	-1.15648e-18	1.53497e-17	4.53656e-17	-2.83864e-17	6.09782e-18	5.0307e-17	-7.12814e-17	-4.6877e-17	3.75857e-17	-1.65062e-17	1.30262e-16	-9.48316e-17	-6.20295e-18	-7.1991e-17	-6.63926e-17	-5.26199e-17	-1.77441e-16	-3.20661e-17	-6.76805e-18	-1.35558e-17	4.23693e-17	9.78805e-17	4.8362e-18	9.48841e-17	-9.8301e-17	7.58022e-17	3.76382e-17	-2.08955e-17	-7.91665e-17	8.54746e-17	-5.26199e-17	-1.09025e-16	-1.63706e-16	4.33681e-17	6.20886e-17	-4.8362e-17
109	MEM100	-0.0324374	0.0243818	0.022365	-0.033244	0.015857	0.000368237	-0.0511861	0.0831378	0.0514502	1.02612e-16	-4.08764e-16	1.00929e-17	3.95307e-17	-3.53253e-17	6.30809e-18	1.78309e-16	-1.26162e-16	-2.22886e-17	-3.06993e-17	6.52887e-17	1.57702e-17	-4.12128e-17	-1.25741e-16	5.3829e-17	1.80832e-16	-8.3477e-17	1.80832e-17	-1.62328e-16	-2.32979e-16	5.80344e-17	4.36309e-17	2.48065e-16	5.04647e-17	1.51394e-16	-1.05976e-16	1.68216e-18	1.30367e-16	8.83132e-17	-1.14387e-16	3.55355e-17	4.96236e-17	-1.77888e-16	7.65381e-17	-2.52323e-17	1.1967e-16	-6.43425e-17	1.9534e-16	3.49888e-16
110	MEM101	0.0328663	0.00606576	-0.0136252	0.0509474	0.00700493	-0.0366912	0.0318695	0.00646482	0.0381578	-1.57282e-16	4.56705e-16	1.93448e-17	5.04647e-18	4.79414e-17	-1.05976e-16	-1.50553e-16	-2.60734e-17	8.15846e-17	3.40637e-17	6.32911e-17	4.01615e-17	-4.07923e-17	7.82203e-17	-9.75651e-17	-1.34572e-16	1.47399e-16	7.31738e-17	2.52323e-18	-5.04647e-18	1.0934e-17	2.44964e-17	5.7719e-17	5.04647e-18	9.42007e-17	1.4803e-16	-1.11443e-17	2.77556e-17	5.46701e-18	1.17751e-16	-3.90444e-17	9.54624e-17	-4.12128e-17	-9.23083e-17	-6.13987e-17	-2.43085e-16	2.83443e-16	1.96444e-16	-2.63257e-16
111	MEM102	-0.0128072	-0.0646103	-0.000641369	-0.0348444	-0.00778992	0.0181069	0.0243826	0.0212031	0.0261109	1.51394e-17	-1.64851e-16	-8.41078e-19	7.73792e-17	6.72862e-18	5.25674e-17	1.07658e-16	2.1868e-17	-2.77556e-17	-1.6401e-17	-2.17629e-17	-7.99024e-17	-1.91766e-16	-4.96236e-17	6.72862e-17	-1.92607e-16	4.18436e-17	-7.14916e-18	-5.46701e-17	7.82203e-17	-8.62105e-17	-4.20539e-17	-3.21187e-16	-4.03717e-17	1.00929e-17	1.21115e-16	1.00509e-16	-3.53253e-16	5.55112e-17	-1.34572e-17	-1.13677e-16	1.03453e-16	2.27932e-16	-2.94377e-17	8.41078e-17	1.91923e-16	4.16334e-17	-9.04159e-18	9.25186e-18
112	MEM103	-0.0289461	-0.0610074	-0.000106719	0.0685701	-0.0142701	0.0396064	0.00383658	-0.0414769	-0.0299463	5.3829e-17	-1.60646e-16	1.68216e-18	1.36255e-16	1.00929e-17	4.66798e-17	1.68216e-18	3.1961e-17	-2.81761e-17	-1.46768e-16	-2.74822e-16	3.36431e-17	2.01859e-17	6.77068e-17	1.9513e-16	-5.29879e-17	-3.06363e-16	1.57282e-16	-2.32979e-16	1.15228e-16	8.30565e-17	-3.29072e-17	-3.235e-16	1.79991e-16	2.39707e-16	-1.11022e-16	-4.41566e-17	4.37361e-17	3.33067e-16	8.24256e-17	1.08814e-17	-1.44665e-16	-2.14475e-17	-2.5779e-16	-5.17263e-17	-9.75125e-18	1.29526e-16	3.5278e-16	3.99512e-17
113	MEM104	0.084001	-0.00449713	-0.0170263	-0.00715424	0.0120151	0.00179262	0.00603825	-0.00393654	-9.70718e-05	-1.15228e-16	2.27091e-17	2.60524e-16	1.02612e-16	2.1027e-18	-2.96585e-16	2.1069e-16	1.46768e-16	-1.09445e-16	4.6785e-17	-6.1425e-17	-3.33803e-17	2.83864e-17	2.20783e-16	-1.64431e-16	4.96131e-16	-6.88107e-17	-8.44232e-17	-7.99024e-18	9.06787e-17	-3.27495e-17	4.81517e-17	-1.76718e-16	2.36763e-16	1.43194e-16	-5.63522e-16	1.02927e-16	-1.16489e-16	-3.26128e-16	9.75651e-17	-1.33653e-16	5.63522e-17	1.59384e-16	3.00685e-17	-1.49396e-16	-4.48301e-17	1.02822e-16	-3.40315e-16	3.57984e-16
114	MEM105	0.0116255	-0.0381613	0.000125456	0.0626514	-0.0470584	-0.0185426	-0.0240235	-0.10532	-0.00540742	9.42007e-17	1.21115e-16	4.37361e-17	1.68216e-16	-7.40149e-17	-1.94289e-16	-2.89331e-16	-2.01859e-17	-4.87825e-17	-5.88755e-17	-8.20051e-17	4.20539e-17	5.3829e-17	1.04294e-16	-8.07435e-17	-1.14387e-16	2.1027e-18	1.0934e-16	1.05976e-16	-6.98095e-17	-4.54182e-17	-3.91101e-17	-6.43425e-17	-1.21115e-16	-1.68216e-16	-4.37361e-17	3.86896e-17	2.35502e-17	-4.03717e-17	2.89331e-16	-6.38168e-17	-1.42983e-16	-9.75651e-17	5.21468e-17	-1.36255e-16	-4.78889e-17	2.94377e-17	2.08167e-17	-1.73262e-16
115	MEM106	-0.0346657	-0.0127517	0.00897326	-0.0724067	-0.0152228	0.00677199	-0.0305326	0.0469644	0.0134409	-5.04647e-17	-6.05576e-17	-4.20539e-17	-9.92472e-17	-1.00929e-17	6.13987e-17	1.16069e-16	-1.68216e-17	-4.12128e-17	3.36431e-17	3.32226e-17	-3.70074e-17	5.21468e-17	-8.83132e-17	-1.34572e-16	-5.63522e-17	3.61664e-17	2.52323e-18	-1.34572e-17	-4.96236e-17	1.47189e-17	2.98583e-17	-8.20051e-18	3.36431e-17	9.42007e-17	1.17751e-17	9.75651e-17	3.70074e-17	-1.17751e-17	-1.27844e-16	4.21065e-17	7.90613e-17	-3.1961e-17	4.20539e-18	7.06506e-17	-2.02384e-17	1.70739e-16	5.09904e-18	4.58388e-17
116	MEM107	0.0672981	0.0241502	-0.0242784	-0.0715108	-0.0545113	-0.0663219	-0.0197719	0.0623152	-0.00966047	-2.59052e-16	-3.17507e-16	2.37605e-17	-1.76626e-17	2.94377e-18	-3.04681e-16	-7.23327e-17	9.16775e-17	6.99146e-17	-6.30809e-19	1.20537e-16	-8.27411e-17	-2.75453e-17	-2.67463e-16	-2.00177e-16	-4.00353e-16	1.50343e-17	-2.4181e-17	-1.82934e-17	1.81988e-16	-1.69793e-17	-2.89121e-18	-1.88559e-16	2.7335e-17	3.42739e-17	3.78485e-18	-1.56861e-16	5.50906e-17	-3.15404e-17	1.54758e-16	-4.34469e-17	5.55112e-17	-1.89243e-17	-6.41322e-18	5.25674e-18	1.34796e-16	8.72618e-18	4.8822e-17	2.62416e-16
117	MEM108	-0.0379087	0.00720856	0.0025719	-0.045294	-0.0177517	0.0233097	-0.0508503	-0.0141187	-0.009884	1.73472e-16	1.71159e-16	-4.07923e-17	-8.43181e-17	1.05135e-17	1.36044e-16	7.30687e-17	-4.14231e-17	-2.88069e-17	-1.57702e-17	-4.30133e-17	7.62227e-19	3.69023e-17	8.99954e-17	7.19122e-17	1.75155e-16	-7.46457e-18	-3.79536e-17	9.46213e-19	4.67061e-17	3.18033e-18	-4.30001e-17	-1.28659e-17	-4.73106e-17	-1.86089e-17	-1.22377e-16	-4.0214e-17	3.87947e-17	6.3186e-17	-9.46213e-17	-9.66846e-17	3.18558e-17	7.58022e-17	4.23693e-17	5.24622e-17	9.5193e-17	-3.37483e-17	1.24716e-17	-1.31524e-16
118	MEM109	-0.0113978	0.00358708	-0.0203752	-0.105612	-0.0353882	0.00178232	-0.0211398	0.0112215	0.00444791	9.75651e-17	-1.44665e-16	2.22045e-16	-1.54758e-16	7.90613e-17	1.17751e-16	2.13634e-16	-4.20539e-17	-2.85967e-17	-1.26162e-18	3.13302e-17	6.01371e-17	-5.88755e-17	1.35414e-16	2.96059e-16	-8.15846e-17	1.43194e-16	-3.86896e-17	-9.25186e-18	2.498e-16	-4.12128e-17	1.26162e-18	-1.18487e-16	-1.3289e-16	-1.00929e-17	-1.91766e-16	-2.1868e-16	-2.93536e-16	7.23327e-17	-2.05223e-16	-1.06633e-16	1.2448e-16	9.84061e-17	-1.35414e-16	1.53076e-16	8.4686e-17	-1.02191e-16	-4.27373e-17	4.66798e-17
119	MEM110	0.030877	0.0201772	0.00454965	-0.052535	-0.00456749	-0.0199605	-0.0298239	0.0691758	0.0287611	4.45771e-17	1.59805e-16	-1.15228e-16	-8.49489e-17	4.20539e-17	3.23815e-17	1.27844e-16	6.72862e-17	3.97409e-17	7.71689e-17	-9.71445e-17	6.04525e-17	4.33155e-17	5.25674e-18	1.43824e-16	-4.2096e-16	-3.81324e-16	-3.62715e-16	1.20274e-16	2.75138e-16	4.46507e-16	4.96762e-17	-2.7038e-16	3.69233e-16	9.07103e-16	2.40548e-16	-3.46734e-16	-1.74524e-16	-5.6184e-16	-2.12793e-16	-4.70609e-17	9.25186e-18	-3.38534e-16	-3.41688e-16	-9.33597e-17	2.36277e-16	-1.20274e-16	2.99187e-16	2.91749e-16
120	MEM111	-0.0495135	-0.0544664	0.00564762	-0.0358235	0.062585	-0.0179326	0.0165017	0.0283235	-0.0133748	-5.04647e-18	6.72862e-18	-1.85037e-17	-9.58829e-17	6.72862e-18	5.55112e-17	3.1961e-17	1.58123e-16	1.69898e-16	1.70739e-16	1.85458e-16	2.22886e-17	6.89684e-17	-1.38778e-16	-1.34572e-17	-3.95307e-16	1.22377e-16	-6.13987e-17	2.1027e-17	5.08852e-17	-1.02822e-16	6.43425e-17	-2.98583e-16	-7.73792e-17	-7.40149e-17	-1.51394e-16	3.18769e-16	-1.14387e-16	1.16069e-16	6.79795e-32	-1.97128e-17	3.2802e-17	1.4803e-16	-4.41566e-17	-9.58829e-17	2.31218e-16	-8.579e-17	4.33155e-17	3.57458e-16
121	MEM112	0.0016114	-0.0137082	0.00535124	0.024397	-0.0120457	0.0183043	-0.0291525	-0.0180769	0.0046778	3.06993e-17	2.78607e-17	-6.97569e-17	1.04609e-16	-1.29316e-17	-6.33174e-17	2.17629e-17	2.17629e-17	-1.62512e-16	8.08486e-17	2.585e-17	-3.28809e-17	8.93645e-19	1.24795e-16	7.52765e-17	3.40321e-16	-2.42336e-17	-8.64208e-17	-2.8071e-17	1.37963e-16	3.13302e-17	-2.08443e-16	1.41663e-16	3.06993e-17	-2.12898e-17	1.11127e-16	-1.59621e-16	-4.18436e-17	-3.76382e-17	9.46213e-17	-1.09634e-16	-7.70112e-17	4.15808e-17	-4.73106e-17	6.50258e-17	-1.89911e-16	1.27213e-17	1.1258e-16	-3.00107e-16
122	MEM113	0.0193215	-0.00260558	0.0318798	-0.0491056	0.0341105	0.0235702	0.0504368	0.0162568	0.0309267	6.72862e-18	-4.33996e-16	9.16775e-17	-3.12881e-16	5.55112e-17	-1.46768e-16	-3.70074e-17	1.51394e-16	3.7428e-16	3.11199e-17	5.67728e-18	-2.60734e-17	-4.87825e-17	-8.41078e-17	-1.51394e-16	2.66622e-16	-2.38025e-16	6.4763e-17	-4.62593e-17	-1.88822e-16	8.83132e-18	-1.62959e-16	5.24938e-16	-1.4803e-16	6.30809e-17	1.05976e-16	-1.17751e-16	-6.72862e-18	2.35502e-17	-1.58123e-16	-6.15038e-17	7.06506e-17	6.81273e-17	-5.63522e-17	1.36255e-16	-3.43633e-16	6.93889e-17	1.19486e-16	4.65116e-16
123	MEM114	-0.0289884	0.033224	-0.0110102	0.0612042	0.00789775	0.0458845	0.00512264	0.00204563	-0.0112198	6.64452e-17	1.15228e-16	-3.73228e-17	7.21224e-17	-5.80344e-17	8.85235e-17	-1.82934e-17	-4.77312e-17	-9.85113e-17	1.41406e-17	2.16578e-17	-6.47104e-17	2.06064e-17	7.13865e-17	-3.02788e-17	-1.90609e-16	2.49774e-16	-3.61664e-17	2.44964e-17	-4.18962e-17	4.46823e-18	2.02963e-16	-5.40787e-17	-6.26603e-17	1.1712e-16	1.30367e-17	-1.02454e-16	-3.14353e-17	2.39707e-17	-7.69586e-17	-1.54591e-16	1.21641e-16	-1.41617e-16	-1.46663e-16	3.67972e-17	3.37279e-16	2.19153e-16	2.21637e-17	-3.42739e-17
124	MEM115	-0.0396849	0.0823568	0.0341842	-0.0485485	0.0551053	-0.101971	0.0472858	0.0254058	-0.0120432	7.5697e-18	2.77556e-17	-2.6494e-17	-5.04647e-17	1.54758e-16	-8.60002e-17	-1.93448e-17	2.01859e-17	-4.62593e-18	6.09782e-17	-6.84427e-17	-3.25918e-17	4.20539e-19	-7.14916e-17	7.40149e-17	9.6724e-18	-7.77997e-17	2.27091e-17	-3.40637e-17	-7.86408e-17	1.31734e-16	-1.42878e-16	-8.69464e-17	1.1691e-16	-3.32226e-17	5.59317e-17	1.61277e-16	1.33311e-16	-9.6724e-18	1.73262e-16	5.31719e-17	4.54182e-17	1.99756e-16	8.51592e-17	-1.82934e-17	-7.32132e-17	-6.60246e-17	-6.51835e-17	-1.68216e-18
125	MEM116	0.0130299	-0.0669317	0.00809598	0.0456047	0.0297951	0.032762	0.00854159	0.0220485	0.02263	3.70074e-17	9.16775e-17	-6.51835e-17	-1.74524e-17	7.23327e-17	-5.29879e-17	5.67728e-18	1.03032e-16	-1.30893e-16	7.38046e-17	3.50362e-17	1.37201e-17	3.71126e-17	1.26162e-18	4.58388e-17	3.78485e-17	-1.45349e-17	-6.03474e-17	-6.10833e-17	-2.11111e-16	6.14513e-17	-7.50136e-17	3.44711e-17	5.23571e-17	-1.13125e-16	3.67972e-17	-3.57668e-16	-1.82829e-16	-2.88069e-17	7.44354e-17	-8.92528e-17	-2.94377e-17	2.68094e-17	1.34047e-17	5.07801e-17	8.59575e-17	1.17225e-17	-1.19551e-16	-5.04121e-17
126	MEM117	0.0359839	-0.0382428	-0.00857173	-0.0371224	0.0113058	-0.0196492	0.00247177	-0.0452352	0.00392478	5.71933e-17	1.85037e-17	-2.77556e-17	1.0934e-17	-1.68216e-18	3.44842e-17	-9.75651e-17	3.02788e-17	-4.87825e-17	-6.26603e-17	3.88999e-17	3.95307e-17	3.36431e-17	3.70074e-17	3.02788e-17	1.17751e-17	1.05135e-18	4.20539e-19	5.04647e-18	-1.0934e-17	-2.4181e-17	-1.85037e-17	-1.61908e-17	1.07658e-16	1.06817e-16	2.52323e-18	2.27091e-17	4.45771e-17	-5.04647e-18	8.41078e-17	4.25796e-17	9.25186e-17	-1.0934e-16	2.6494e-17	1.38778e-17	1.36412e-17	-4.33155e-17	5.78241e-18	5.00441e-17
127	MEM118	0.0060594	-0.104154	0.00082616	0.0952425	-0.0168517	0.0623192	0.0708831	0.019976	0.0858872	1.31629e-16	2.93326e-16	-8.73144e-17	-3.73228e-18	-9.02056e-17	-7.46194e-17	6.38168e-17	1.14176e-16	-8.91806e-17	-4.10026e-17	-1.86614e-18	-2.00545e-17	-4.57336e-17	2.55477e-17	-6.09782e-17	3.47681e-16	-1.52892e-16	-5.43547e-17	5.24622e-17	-7.67747e-17	-1.83854e-17	3.99512e-18	5.15653e-16	-9.5988e-17	6.245e-17	2.08167e-17	1.85247e-16	8.83132e-17	4.03717e-17	-1.72421e-17	-2.73153e-17	-1.49817e-17	5.16212e-17	2.19732e-17	-1.67164e-17	1.48064e-16	-1.58675e-16	-1.20314e-17	9.73022e-17
128	MEM119	-0.0441946	-0.035653	0.00426974	0.034304	-0.0502692	-0.0664656	0.056575	-0.00999323	0.00494058	6.89684e-17	-1.07658e-16	1.0934e-17	-3.44842e-17	-3.02788e-17	-9.25186e-18	-1.31208e-16	-7.06506e-17	6.01371e-17	9.16775e-17	-9.31494e-17	1.167e-16	4.54182e-17	-2.22886e-17	-4.20539e-17	-5.04647e-17	9.90369e-17	-3.40637e-17	5.13058e-17	8.22154e-17	3.82691e-17	8.04281e-17	4.52079e-17	2.43913e-17	4.79414e-17	1.33731e-16	-8.36873e-17	-4.12128e-17	-7.06506e-17	1.27844e-16	-2.85178e-17	1.20274e-16	-7.40149e-17	-6.81273e-17	-3.57458e-17	2.06196e-16	8.53694e-17	-9.33597e-17	2.1027e-18
129	MEM120	-0.012317	0.0400538	0.00544858	0.0397166	0.0405481	0.0123981	0.012573	-0.0724171	-0.00588469	-2.25409e-16	-7.90613e-16	2.1868e-17	-1.00929e-17	6.72862e-18	4.96236e-17	-2.65781e-16	-4.71004e-17	-6.13987e-17	7.73792e-17	-1.85458e-16	-2.21624e-16	8.41078e-18	-8.74721e-17	-2.35502e-16	-1.19433e-16	-9.25186e-18	-1.12704e-16	8.74721e-17	-4.46192e-16	-4.75209e-17	1.24059e-17	-7.14916e-17	2.28773e-16	-1.12704e-16	-1.7158e-16	-3.36431e-17	4.54182e-17	-3.02788e-17	2.11952e-16	-2.41284e-17	-5.04647e-17	-1.69057e-16	7.99024e-17	-6.39219e-17	3.71546e-16	-3.95307e-17	-1.00929e-17	-5.08432e-16
130	MEM121	0.0442024	0.0279086	-0.0288259	0.0226418	-0.0522628	0.0182083	0.0332737	-0.132363	-0.0260792	4.44089e-16	4.23903e-16	4.87825e-17	-3.70074e-17	1.00929e-16	-1.18592e-16	-1.68216e-17	7.40149e-17	-5.63522e-17	-6.89684e-17	5.04647e-17	1.35414e-16	-2.69145e-17	8.74721e-17	4.03717e-17	-4.60911e-16	4.2895e-17	1.2448e-16	6.39219e-17	-3.31385e-16	1.26162e-17	2.48118e-17	-2.35712e-16	1.91766e-16	2.48959e-16	-9.42007e-17	5.88755e-17	2.01859e-16	3.12881e-16	3.36431e-16	-4.51028e-17	-1.49712e-16	-7.06506e-17	2.30455e-16	-1.05976e-16	-3.18033e-17	-1.55599e-16	1.61277e-16	4.28109e-16
131	MEM122	-0.0383133	0.127661	0.0196288	0.0120591	0.00120828	-0.0170739	0.0970321	0.0414902	-0.00575074	1.05135e-17	4.81517e-17	-9.25186e-17	3.80588e-17	8.62105e-18	4.91505e-18	-3.67972e-18	-1.14597e-17	6.72862e-18	2.06327e-17	8.85366e-17	4.38675e-17	6.54464e-17	-1.96602e-17	4.35258e-17	5.29879e-17	4.85065e-17	5.89017e-17	-2.61786e-17	-8.62368e-17	1.37989e-18	-2.12635e-17	3.62846e-17	3.91101e-17	3.92153e-17	2.90172e-17	-1.06265e-16	1.07763e-17	-1.73472e-18	-2.94377e-18	-9.59716e-17	1.62906e-16	1.2879e-17	-5.76401e-17	-4.6785e-17	-3.26558e-17	3.61664e-17	-1.80733e-17	-1.42458e-17
132	MEM123	0.031052	-0.0498381	-0.00250403	0.0108864	-0.00536866	-0.0172967	0.0863861	-0.01835	-0.0290678	-1.60225e-16	-1.00404e-16	-5.88755e-18	-1.57702e-17	-3.91101e-17	-4.9939e-17	1.10391e-17	4.26847e-17	-1.09866e-17	1.1118e-16	-1.45874e-17	2.75979e-17	-1.27949e-16	-6.7076e-17	4.62593e-17	1.07605e-16	1.98836e-16	1.51026e-16	8.35821e-18	3.93992e-17	7.48034e-17	4.77837e-17	-2.3813e-17	-9.25186e-18	3.95307e-17	1.0955e-16	-1.29631e-16	5.68779e-17	1.13861e-16	-7.77997e-18	-1.08716e-17	-3.88999e-18	3.52727e-17	-1.87823e-16	-4.23167e-17	-1.8084e-16	1.24427e-16	-1.78762e-17	-1.39566e-16
133	MEM124	0.0773027	-0.0580959	0.00233202	0.00938834	0.0191067	0.00665043	-0.0515834	-0.0254821	0.0182418	4.47874e-16	4.08028e-16	3.50099e-17	1.42983e-17	-2.94377e-18	-6.46053e-17	-6.68657e-17	1.24059e-16	-8.72618e-17	-2.66517e-17	-3.34854e-17	2.44701e-17	5.17263e-17	6.04525e-17	-3.86896e-17	6.84427e-17	-5.8087e-18	9.25186e-17	-2.33399e-17	1.03426e-16	6.77856e-17	6.42636e-18	2.62055e-16	-2.1027e-18	1.27213e-17	-5.70882e-17	-4.90979e-17	2.1027e-17	-3.53253e-17	9.77753e-17	-3.73557e-17	3.79536e-17	-1.44928e-16	3.61138e-17	-4.18962e-17	3.01724e-16	8.36873e-17	-1.20445e-17	2.65386e-16
134	MEM125	-0.032206	0.0627002	0.0111551	0.0352802	-0.0210756	0.0340759	-0.00781615	0.00258256	0.0165905	-4.54182e-17	-2.9648e-17	-4.20539e-19	1.00509e-16	4.89928e-17	4.01089e-17	-1.8714e-17	-5.84549e-17	4.25796e-18	-3.97409e-17	5.36187e-18	-4.26847e-17	-7.70638e-17	4.2159e-17	1.51394e-17	-1.57597e-16	-5.29353e-17	-5.89806e-17	8.90491e-17	-1.14176e-16	-7.6065e-17	-1.54811e-17	-9.65137e-17	2.08167e-17	1.92397e-17	2.54426e-17	1.04504e-16	1.57176e-16	-1.72421e-17	-2.98583e-17	-9.03765e-17	3.6692e-17	-7.07557e-17	3.26443e-17	9.77753e-18	4.07824e-17	5.87178e-17	-4.27373e-17	5.9296e-17
135	MEM126	-0.027008	0.0122787	0.0113428	0.00594458	0.0461091	0.0472438	0.0295257	-0.0393448	0.0280747	-2.4938e-16	3.70495e-16	8.38975e-17	-1.99125e-16	-1.68216e-18	1.63379e-16	6.35014e-17	1.65272e-16	-7.99024e-18	-1.46453e-16	1.80937e-16	8.86286e-17	-2.37605e-17	6.01371e-17	2.50641e-16	-2.94377e-17	-1.89505e-16	2.6494e-17	8.43181e-17	-1.47925e-16	2.95954e-17	8.12166e-17	-1.73472e-17	-2.70827e-16	3.00685e-17	-1.13125e-16	-6.7076e-17	-1.83776e-16	5.40393e-17	1.21115e-16	-1.49686e-17	-2.12372e-17	7.82203e-17	-4.68901e-17	4.68901e-17	3.00482e-16	3.23815e-17	-1.00312e-16	7.24694e-16
136	MEM127	0.0380025	-0.0200598	-2.31364e-05	0.0218685	-9.85777e-05	6.96048e-05	0.000211712	-0.00106915	0.000130411	1.1118e-17	9.96152e-18	4.47348e-17	7.86014e-17	1.19591e-17	1.35624e-17	5.46964e-17	-7.30687e-18	8.31879e-18	2.11518e-17	4.78692e-18	1.77809e-17	-2.93457e-17	3.73228e-18	3.38008e-17	1.6953e-17	-3.3952e-17	1.04741e-17	-2.63625e-17	7.73398e-18	-3.78157e-18	1.20971e-17	6.88304e-19	-2.50221e-17	4.22905e-17	-2.1684e-17	-5.10232e-17	-2.24857e-17	1.94631e-17	-4.59965e-17	8.58778e-18	-2.07641e-18	1.2787e-17	-1.02704e-17	1.44035e-17	2.33013e-17	4.4886e-17	2.95149e-17	6.58406e-18
137	MEM128	-0.0326637	-0.0795985	-0.00837372	-0.00070232	-0.0644831	0.0264389	-0.0202289	-0.0493832	0.00793792	2.72246e-16	-4.2845e-16	-6.32648e-17	4.84671e-17	1.48766e-17	1.87928e-18	1.28264e-17	5.97165e-17	-5.89412e-17	-2.28668e-18	4.85493e-17	-5.948e-17	-4.19225e-17	3.63109e-17	-4.83094e-17	-7.75895e-17	3.03117e-17	-8.62105e-17	9.35174e-17	-6.90867e-17	2.01793e-17	3.8982e-17	-1.69428e-16	-1.07632e-16	-3.78748e-17	3.41688e-17	-5.99268e-18	-5.79293e-17	8.35821e-18	2.20257e-17	-7.25635e-17	-1.1302e-17	6.20164e-17	-1.35098e-16	-8.28988e-17	2.16096e-16	1.27896e-16	-1.76589e-16	-2.29588e-16
138	MEM129	-0.00467393	0.143651	0.00134069	-0.0568166	-0.017304	-0.0334077	-0.0172541	0.0729572	0.0124043	-1.83355e-16	2.52954e-16	-3.65869e-17	-6.05576e-17	-7.90613e-17	2.38656e-17	-8.41078e-19	-1.04714e-16	-4.27898e-17	1.37727e-17	3.36431e-18	-4.53131e-17	7.07557e-17	3.67972e-17	5.08852e-17	-4.89928e-17	1.06028e-16	-1.208e-16	-1.15648e-18	-1.96707e-16	1.7978e-17	-6.20295e-18	-1.17698e-16	-4.77312e-17	-1.69687e-16	1.27003e-16	-5.10955e-17	-2.77766e-16	2.77556e-17	3.49047e-17	-1.6422e-16	-9.08364e-17	1.57702e-17	-7.86408e-17	-4.73106e-18	-2.08256e-16	7.87459e-17	-9.08364e-17	1.55757e-16
139	MEM130	-0.0460409	0.0223085	-0.0107946	0.0542532	-4.69975e-05	-0.0618159	-0.0340932	-0.00873166	-0.0210607	5.41313e-17	-1.39632e-16	8.52117e-17	-6.60838e-17	-3.61006e-17	-2.45917e-17	5.90069e-18	3.69549e-17	8.61054e-17	-6.48747e-17	-8.77826e-17	-3.63963e-17	-5.90069e-18	-2.10072e-17	-1.13072e-16	2.9853e-16	-1.04106e-16	9.50352e-17	8.1946e-17	1.72776e-16	2.837e-18	-1.19821e-17	3.58091e-16	5.41444e-17	3.73097e-17	-1.39251e-16	9.13424e-17	-2.72306e-16	-1.58523e-16	1.52445e-17	2.00986e-16	-7.81677e-17	7.11894e-17	1.46213e-16	4.32301e-17	2.72442e-16	2.01905e-16	8.10318e-17	1.32595e-16
140	MEM131	0.0429063	-0.0357668	0.0128115	0.0312715	-0.111475	0.045799	0.0415614	-0.0217051	0.0184265	-7.99024e-17	2.14475e-17	1.15753e-16	-8.93645e-18	9.6724e-18	4.35784e-17	8.8944e-17	-2.1027e-19	-1.17961e-16	-2.49695e-17	-7.86014e-17	-6.42636e-17	5.66676e-17	-1.07763e-17	-9.25186e-17	-6.81799e-17	1.13388e-16	-2.70722e-17	9.74074e-17	1.02375e-16	-1.85563e-17	5.10166e-17	-1.18671e-17	-5.66676e-17	-6.43425e-17	-1.02506e-16	4.78889e-17	1.29316e-17	1.03032e-16	5.9296e-17	2.15855e-18	-2.31296e-18	2.28037e-16	6.11884e-17	-2.82287e-17	-2.18871e-16	-8.10063e-17	2.67601e-17	-8.43706e-17
141	MEM132	0.0304218	0.0105945	-0.0119663	-0.0645917	-0.000931757	0.0117538	-0.0417788	0.0728807	-0.0212423	5.3829e-17	-1.39619e-16	4.52079e-17	-3.63766e-17	-2.77556e-17	4.35258e-17	-2.48118e-17	1.33311e-16	2.70196e-17	-1.13546e-17	5.57214e-17	1.29316e-17	-1.11022e-16	-3.93204e-17	3.2802e-17	2.37394e-16	7.60124e-17	-1.89243e-17	1.40881e-17	-1.0545e-16	-8.93645e-17	-1.73472e-18	1.75076e-16	-8.78927e-17	-8.74721e-17	3.78485e-18	-1.33311e-16	1.56651e-16	-5.25674e-18	-3.86896e-17	1.81344e-16	-5.10955e-17	-2.92275e-17	-4.74158e-17	-8.32667e-17	1.5696e-16	2.08692e-16	4.62856e-17	1.1302e-16
142	MEM133	-0.0151871	0.0275601	0.0108175	-0.0132509	-0.0851116	0.00708709	0.0241936	0.108664	-0.00990283	-9.42007e-17	1.42142e-16	4.20539e-18	1.68216e-18	-3.2802e-17	-4.6049e-17	4.20539e-17	1.22797e-16	-5.71933e-17	-3.95307e-17	3.54304e-17	6.93889e-18	7.10711e-17	-6.13987e-17	7.90613e-17	-3.36431e-17	1.11758e-16	1.42983e-17	2.39707e-17	2.20573e-16	-2.20783e-18	4.6049e-17	-1.03505e-16	-4.37361e-17	2.81761e-17	8.32667e-17	1.19433e-16	-1.9513e-16	8.24256e-17	1.34572e-17	-1.20826e-16	1.42983e-17	6.18192e-17	-8.78927e-17	2.22886e-17	-1.8346e-16	6.45527e-17	-7.51714e-18	-2.21834e-16
143	MEM134	-0.00634954	-0.013537	-0.00210524	0.00599924	-0.0684595	0.00654607	-0.0407427	0.0203475	0.00212397	9.75651e-17	-3.06152e-16	-8.83132e-17	-4.87825e-17	-1.2448e-16	3.40637e-17	-1.26162e-17	3.53253e-17	7.65381e-17	-1.58543e-16	1.33626e-16	1.62538e-16	1.97653e-17	7.5697e-18	-1.00929e-17	-1.10602e-16	-9.93523e-17	6.35014e-17	2.00177e-16	5.42495e-17	8.08486e-17	6.4763e-17	5.94011e-18	-2.60734e-17	-1.0934e-16	6.89684e-17	1.39619e-16	4.24744e-17	7.5697e-18	-9.42007e-17	-4.98602e-17	5.34085e-17	-8.62105e-17	-5.27776e-17	-7.5697e-17	-1.28567e-16	-2.62837e-17	6.65503e-17	5.26305e-16
144	MEM135	0.0367403	-0.0688339	-0.00377213	0.0176209	0.0283121	-0.0205424	-0.0174187	-0.0121552	-0.0189859	-5.46701e-17	1.35151e-16	4.66798e-17	-6.67606e-18	-2.49169e-17	5.94537e-17	-3.28546e-17	1.97653e-17	3.2986e-18	8.36084e-17	-5.57346e-17	4.38938e-18	-6.87318e-17	2.64677e-17	-5.88755e-18	5.77715e-17	1.02053e-16	-1.92659e-17	-8.22942e-17	-2.22215e-16	1.89821e-16	-4.80992e-17	2.14271e-16	3.99512e-18	-7.21224e-17	-8.67362e-17	-1.06186e-17	2.15263e-17	2.52323e-17	-4.31053e-18	5.42857e-17	3.69023e-17	3.97672e-17	3.24341e-17	7.10185e-17	1.12754e-16	-3.23289e-17	1.19794e-16	-1.82974e-16
145	MEM136	-0.0101433	0.0118932	-0.0148755	-0.0504126	-0.128238	-0.0167428	-0.0136711	0.000125606	-0.0317124	8.41078e-18	3.95307e-17	3.61664e-17	8.49489e-17	-3.78485e-17	5.58266e-17	-6.49733e-17	9.90369e-17	-7.82203e-17	3.98461e-17	1.53707e-16	-1.92134e-17	-1.81252e-16	8.10589e-17	-5.74036e-17	1.11863e-16	9.17038e-17	-7.30687e-18	-8.41078e-19	-3.28336e-16	1.74997e-16	1.67164e-17	1.41906e-16	-1.14492e-16	-8.51592e-18	-3.67972e-17	-1.84511e-16	-3.15615e-16	1.31103e-16	-1.72421e-17	-7.51549e-17	1.4803e-16	6.58669e-17	1.10917e-17	-9.18352e-17	-1.99855e-17	-6.74439e-17	1.24953e-16	-1.22876e-16
146	MEM137	-0.0196999	-0.0179985	0.00947402	0.0135865	0.0159596	0.0289381	0.0833143	-0.019571	0.0361807	3.17507e-17	5.41444e-17	1.21693e-16	-6.10833e-17	-4.2895e-17	4.46823e-18	-1.46137e-17	-2.9648e-17	6.51835e-18	-8.8576e-18	8.42392e-18	-3.97409e-17	-6.15038e-17	3.61138e-17	-3.76382e-17	-7.7274e-18	8.96668e-17	-1.85037e-17	-6.51835e-18	-5.19103e-17	1.25347e-16	-1.66639e-17	3.7152e-17	-1.97653e-17	-9.19929e-18	-2.31296e-18	-2.84652e-17	-6.01371e-17	4.20539e-17	2.50221e-17	-2.76817e-17	1.51394e-17	4.58388e-17	1.36675e-16	-1.73998e-17	3.88325e-17	-1.39803e-16	4.90815e-17	-3.86107e-17
147	MEM138	0.00856161	0.00643236	0.00959235	0.0321838	0.0414155	-0.00697308	0.0389271	-0.00111687	-0.006154	-2.08587e-16	4.4451e-16	-7.94819e-17	-9.79856e-17	9.37802e-17	-3.79536e-17	-1.92607e-16	-1.76626e-17	-1.12494e-17	2.54006e-16	-1.06239e-16	-1.44981e-16	3.7428e-17	-1.00719e-16	6.4763e-17	1.20064e-16	-7.45405e-17	1.24059e-17	6.03474e-17	-2.49275e-16	9.18878e-17	-7.55919e-17	2.06327e-17	5.3829e-17	-1.37727e-16	4.62593e-18	1.76626e-17	-3.1961e-17	4.49977e-17	9.75651e-17	1.91871e-17	-2.01859e-17	4.71004e-17	-9.2098e-17	-9.33597e-17	2.71313e-17	2.31296e-17	3.03839e-17	2.22886e-17
148	MEM139	-0.0337269	0.0550157	-0.0168296	-0.0342348	0.0854951	-0.032288	-0.0314412	-0.0377645	-0.064688	-1.12915e-16	2.28248e-16	5.56163e-17	9.87215e-17	1.59805e-17	-1.39304e-17	-8.43181e-17	9.58829e-17	-4.79414e-17	7.73792e-17	6.06496e-17	-1.12652e-16	3.01737e-17	-7.83254e-18	-5.59317e-17	-2.31612e-16	-5.55112e-17	-2.29457e-16	9.16775e-17	-5.61945e-17	-5.25674e-18	6.64057e-17	3.01211e-17	6.91787e-17	1.61277e-16	1.47189e-17	-7.412e-18	4.11077e-17	-1.64641e-16	-5.19366e-17	5.559e-18	7.65381e-17	8.5422e-17	2.6557e-16	2.9648e-17	1.53102e-18	-3.21712e-17	1.3134e-16	-9.64611e-17
149	MEM140	0.0554053	-0.0321357	0.00368828	-0.00868121	-0.05209	-0.0177441	0.0522448	-0.0190851	-0.0266973	-1.4803e-16	2.05223e-16	-6.72862e-17	5.88755e-18	-8.41078e-17	4.16334e-17	-1.3289e-16	-4.54182e-17	4.75209e-17	-1.02612e-16	1.19854e-16	1.37727e-16	1.51394e-17	1.05135e-17	2.01859e-17	-3.94466e-16	6.30809e-18	1.74524e-16	1.35414e-16	-7.42251e-17	8.41078e-19	4.15282e-17	-2.07431e-16	1.3289e-16	-1.1691e-16	-4.20539e-18	-1.64431e-16	-3.44842e-17	7.23327e-17	3.1961e-17	-1.51131e-16	-4.20539e-17	6.22398e-17	-2.52323e-17	1.30788e-16	-1.853e-17	1.26162e-17	3.32489e-17	-2.74191e-16
150	MEM141	5.10063e-05	-0.0395809	0.0139175	-0.0145444	0.047548	0.0390762	-0.0230981	-0.0338597	-0.0374931	2.37184e-16	-2.67463e-16	5.71933e-17	-1.07658e-16	-1.19433e-16	-1.51394e-17	1.34572e-16	1.16069e-16	-6.81273e-17	6.01371e-17	-1.40881e-17	-7.06506e-17	6.4763e-17	1.59805e-17	-3.02788e-17	1.68216e-18	9.9878e-17	-3.53253e-17	-1.04294e-16	-1.44665e-16	-1.33521e-16	-2.08167e-17	1.24269e-16	-1.07658e-16	1.93448e-17	-7.40149e-17	-3.46104e-16	7.31738e-17	-9.75651e-17	-7.73792e-17	-8.57637e-17	5.04647e-17	5.63522e-17	-1.7915e-16	3.2802e-17	1.82882e-16	-1.18592e-16	-2.94903e-17	2.67883e-16
151	MEM142	0.000746298	-0.0184858	-0.0506476	0.0262443	-0.0559289	-0.0410046	-0.0267303	0.0178936	0.0121024	-7.5697e-17	1.97653e-16	-1.16069e-16	4.37361e-17	-1.02612e-16	-2.1868e-16	-1.26162e-16	1.96812e-16	5.3829e-17	1.8714e-16	-1.80411e-16	-2.77556e-17	3.86896e-17	-1.49291e-16	-1.53076e-16	-1.65692e-16	-5.25674e-17	1.15228e-16	-2.60734e-17	-9.06262e-17	-4.77312e-17	-1.10181e-16	1.16542e-16	1.17751e-17	1.82514e-16	4.87825e-17	4.66798e-17	5.55112e-17	-5.13058e-17	1.2448e-16	2.16578e-17	-1.41301e-16	1.68216e-18	1.97653e-17	-1.98915e-16	-4.76786e-17	1.52235e-16	-2.38656e-17	1.81042e-16
152	MEM143	0.0206835	0.0184684	-0.0235941	0.00933729	0.00663668	-0.00317246	0.0116148	-0.0116433	-0.020355	1.27423e-16	-1.94289e-16	-1.0913e-16	-1.53497e-17	-6.72862e-18	-1.249e-16	-6.13987e-17	1.58123e-16	1.62643e-16	-9.68291e-17	1.70108e-16	-1.11653e-16	2.67042e-17	-1.46768e-16	-5.3829e-17	-3.13512e-16	1.04504e-16	4.77312e-17	-8.6631e-17	2.47067e-16	3.25392e-17	-1.39829e-17	4.91242e-17	-2.31296e-17	-3.00685e-17	-1.10812e-16	-4.37361e-17	1.66113e-17	3.06993e-17	2.1868e-16	4.12391e-17	-1.16279e-16	9.46213e-18	3.31174e-17	-2.20362e-16	1.76456e-16	2.00807e-16	-2.05039e-16	1.99125e-16
153	MEM144	0.0452843	-0.0421732	-0.0222213	0.07475	-0.00919631	0.00481543	0.0257327	-0.00452217	0.000694178	-3.82691e-17	8.15846e-17	-4.62593e-18	-1.00929e-17	-2.14475e-17	1.73472e-17	7.52765e-17	8.41078e-19	-7.0966e-17	1.0545e-16	-1.11101e-16	1.15648e-17	2.9648e-17	1.81883e-17	2.69145e-17	1.17541e-16	1.14071e-17	1.54443e-16	-2.4181e-17	-1.0545e-16	2.65465e-17	-1.1415e-16	-1.31103e-16	-1.13546e-17	-9.88267e-18	1.43404e-16	-1.5602e-16	1.93448e-17	-1.07448e-16	8.41078e-19	-1.00962e-16	9.65137e-17	-8.7367e-17	-1.27739e-16	1.24059e-17	-1.30177e-16	-2.12372e-17	7.83648e-17	-3.92153e-17
154	MEM145	0.0156859	-0.010786	-0.0153705	0.01377	-0.0437781	-0.0320272	-0.0102158	0.00409483	0.00537318	4.1381e-16	-8.41078e-19	-6.72862e-18	-8.579e-17	5.04647e-17	-1.03873e-16	-2.06905e-16	-2.85967e-17	1.47609e-16	-6.35014e-17	1.47189e-18	4.41566e-18	6.35014e-17	-1.93448e-17	9.25186e-17	-6.85479e-17	6.88633e-17	-6.30809e-18	-8.45283e-17	1.00719e-16	-2.31296e-18	1.89243e-18	-1.00667e-16	2.35502e-17	5.13058e-17	-2.69145e-17	3.99512e-17	1.47189e-17	-1.85037e-17	1.73262e-16	3.59035e-17	-3.36431e-18	-6.13987e-17	1.57071e-16	-1.59384e-16	-3.9465e-17	-1.08499e-16	-5.25148e-17	-2.21834e-16
155	MEM146	-0.0214941	-0.015984	0.00555558	0.0651231	-0.0475311	-0.0163797	-0.00931097	0.0114539	0.031445	-6.72862e-18	4.20539e-18	-2.85967e-17	8.6631e-17	-5.04647e-17	7.28584e-17	1.02191e-16	-1.00088e-16	1.31208e-16	-7.94819e-17	1.20642e-16	1.67164e-17	1.12704e-16	-5.80344e-17	1.14387e-16	3.1961e-17	-1.0892e-16	-8.93645e-17	-7.19122e-17	-1.45296e-16	-1.92922e-16	4.88877e-18	-2.06984e-16	-9.79856e-17	-4.58388e-17	5.67728e-17	3.32226e-17	3.04891e-17	2.03961e-16	2.94377e-17	8.85892e-17	3.63766e-17	-7.14916e-18	-8.0323e-17	1.58543e-16	5.11612e-17	-3.61664e-17	-7.41463e-17	-6.57092e-17
156	MEM147	0.0341116	0.0708959	-0.017408	-0.0452585	0.0530982	-0.00564802	-0.0370411	0.0299342	0.00168894	-8.49489e-17	-5.88755e-18	-6.22398e-17	5.71933e-17	-3.2802e-17	3.99512e-17	1.70739e-16	4.87825e-17	3.59561e-17	2.01859e-17	9.45161e-17	-9.46213e-18	-8.95748e-17	-8.45283e-17	-2.85967e-17	-3.01106e-16	-7.11762e-17	1.72421e-17	3.99512e-17	2.05013e-16	-3.83742e-17	5.98217e-17	8.25308e-17	5.88755e-17	-7.90613e-17	-7.5697e-18	-1.26162e-18	-1.00929e-16	-4.37361e-17	-3.02788e-17	-2.47014e-16	-6.50994e-16	1.21956e-16	-4.58388e-17	-1.26162e-17	2.04921e-16	1.95551e-17	-6.52624e-17	1.69898e-16
157	MEM148	0.0258945	-0.0180213	-0.00157714	0.00024491	-0.0226937	0.0082673	-0.0134973	-0.0106546	0.022556	-2.29194e-17	-3.09096e-17	-2.01859e-17	3.73228e-17	2.1027e-19	2.05013e-18	6.30809e-18	4.98339e-17	-2.43387e-17	-1.97128e-17	-3.55093e-17	-6.72337e-17	-1.04609e-16	1.37727e-17	4.49977e-17	-3.30439e-16	-1.21693e-17	-2.95429e-17	8.33719e-17	1.6217e-16	-9.43322e-17	-1.05135e-17	-9.97729e-17	7.2543e-17	4.0582e-17	-1.82934e-16	-8.41078e-17	2.66096e-16	1.21956e-16	2.27091e-17	-4.19225e-17	4.31053e-17	-1.01981e-17	-1.42247e-16	-1.27213e-17	1.21546e-16	-5.58266e-17	-9.96349e-17	1.15806e-16
158	MEM149	0.0642945	-0.102568	-0.0143445	0.0448269	-0.0653463	0.0315218	0.0227131	-0.0377846	-0.018426	1.09419e-16	1.34875e-16	6.36854e-17	-4.71924e-17	8.04281e-18	4.60392e-17	-9.56989e-17	2.58106e-17	-2.05013e-18	4.81583e-17	-1.22413e-16	4.65846e-17	3.1915e-17	-9.08561e-17	-9.52258e-17	-3.92087e-17	-7.64034e-17	-1.25202e-16	5.34413e-17	1.34484e-16	5.07699e-16	-4.42699e-17	3.27659e-16	1.25807e-16	5.26857e-17	2.70157e-16	-3.70994e-17	4.20276e-17	-1.80227e-16	4.08711e-17	6.93955e-17	-1.66652e-16	1.18106e-16	1.37474e-16	-3.65869e-17	-1.20812e-16	-5.05908e-16	-2.72653e-16	-3.1386e-16
159	MEM150	0.0111256	0.0381197	0.0154215	-0.0402414	-0.00500464	-0.016315	-0.00858162	0.0517884	0.00395054	3.60612e-17	2.12004e-16	-4.33681e-18	6.51047e-17	2.51272e-17	4.84408e-17	-5.13583e-17	-2.99634e-17	3.08439e-17	-4.56022e-17	-6.14578e-17	1.00732e-16	5.09904e-17	-1.65587e-17	1.50343e-17	-2.41153e-16	8.17226e-17	-8.15846e-17	2.54689e-17	9.68948e-17	-1.32733e-17	-1.05253e-16	1.29119e-17	6.1241e-17	1.05923e-17	3.46945e-17	8.22679e-17	7.79311e-17	3.18033e-17	-4.26847e-17	4.8339e-17	-8.92068e-17	-9.42007e-17	2.43124e-17	4.79414e-17	1.41451e-16	-7.17545e-18	-1.04653e-16	-3.22107e-16
160	MEM151	0.00918911	0.02393	0.00941425	0.00283007	0.0206231	-0.0366516	-0.0469876	-0.0150758	0.0291796	4.06872e-17	4.04769e-17	-2.65991e-17	9.75125e-17	-1.56966e-16	8.54483e-17	9.79856e-17	2.62837e-17	9.27814e-17	7.35943e-19	-9.92604e-17	3.10148e-18	-6.67606e-17	1.60015e-16	7.14916e-18	-1.61908e-16	4.31053e-18	-5.33559e-17	1.07658e-16	-6.96518e-18	2.33925e-17	2.24331e-17	-4.00761e-17	1.19433e-16	2.52691e-16	-7.31738e-17	2.33925e-17	1.16226e-16	1.06659e-16	2.94377e-17	3.62436e-17	1.62328e-16	-1.16121e-16	-2.19232e-16	-1.05135e-19	7.69389e-17	1.26346e-16	5.83235e-17	-3.36431e-18
161	MEM152	0.0305944	-0.00811414	-0.00757607	-0.0314972	-0.0393559	-0.0467753	0.00567855	0.0208389	-0.0356323	5.05698e-17	-1.33994e-16	8.87863e-17	-1.10234e-16	4.94133e-18	-4.83094e-17	-1.05345e-16	1.51815e-16	-1.03032e-17	1.167e-16	1.22587e-16	3.28809e-17	-5.41444e-18	-7.02563e-17	7.77997e-17	1.4159e-16	-2.29062e-17	-3.91101e-17	-1.0524e-16	2.96086e-17	4.03455e-18	2.0429e-17	6.86859e-17	4.01615e-17	-8.95222e-17	3.91627e-17	5.6983e-17	-7.84305e-17	4.04769e-17	7.69586e-17	-2.67519e-17	-1.40513e-16	5.948e-17	3.43265e-17	9.64086e-17	-1.61221e-16	-6.30809e-17	-1.6539e-16	4.18699e-17
162	MEM153	0.0964235	-0.112636	-0.00606708	-0.0330998	-0.0414374	0.0454366	-0.0212906	-0.0238755	-0.0149609	-2.57265e-16	-5.29091e-16	8.28988e-17	-1.25636e-17	-2.28353e-16	1.40618e-18	1.68163e-16	4.86774e-17	-2.25777e-16	-1.64273e-17	2.61017e-16	3.94781e-17	-2.14212e-17	-8.85497e-17	7.42251e-17	-6.71023e-17	-7.68141e-17	2.62837e-18	-1.83986e-19	1.8396e-16	1.58228e-17	2.1845e-16	1.49751e-16	-2.27091e-17	-5.30931e-18	3.09096e-17	3.91627e-17	-8.82081e-17	5.35662e-17	-6.0873e-17	-6.57092e-19	1.98126e-16	-1.23744e-16	-6.67737e-17	-2.74927e-17	-3.87167e-17	-6.29494e-17	-6.07153e-18	-1.45743e-17
163	MEM154	-0.0165437	0.0217323	-0.00912289	-0.038902	-0.0843181	-0.00636198	-0.0504987	0.0226479	0.012463	-1.41669e-17	-4.94133e-18	-2.85638e-17	-1.48109e-17	-2.25645e-17	6.61429e-17	-2.33399e-17	3.5667e-17	1.93251e-17	3.80916e-17	1.65364e-16	4.00991e-17	-6.81076e-17	4.38675e-17	5.65099e-17	5.0307e-17	-2.66484e-17	-1.46643e-16	8.59871e-17	1.77168e-16	4.90946e-17	9.09662e-17	-8.29776e-17	-4.04375e-17	-2.242e-17	8.27411e-17	-1.17061e-16	5.94208e-17	6.40796e-17	1.64536e-17	-1.95403e-17	-1.12074e-16	1.56703e-16	-2.93983e-17	2.14541e-17	2.00175e-17	-2.93457e-17	-1.09006e-16	-1.02815e-16
164	MEM155	0.00483322	-0.0293092	-0.107413	-0.00229991	-0.0126853	0.005306	-0.0228882	0.0410104	0.015456	-1.07237e-16	-1.73577e-16	-2.31296e-18	5.45649e-17	1.83776e-16	7.76946e-17	-9.29391e-17	5.90857e-17	-2.0475e-16	4.77837e-17	2.41508e-16	-3.80062e-17	4.19488e-17	2.78607e-17	-4.66798e-17	1.53917e-16	-4.095e-17	1.08394e-16	-1.5602e-16	1.986e-16	3.81113e-18	-1.90373e-16	1.66271e-16	-1.57702e-16	2.21098e-16	-2.93326e-17	5.72984e-18	-9.84061e-17	1.01981e-17	-8.15846e-17	6.57585e-17	6.90735e-17	6.95992e-17	8.20051e-18	1.87035e-16	7.04764e-17	-3.01211e-17	1.26727e-16	1.87928e-16
165	MEM156	0.0218809	0.0235413	-0.035711	-0.0257556	-0.0195858	-0.0667979	-0.0057888	-0.00947476	-0.0133019	1.25321e-16	1.0177e-16	1.42983e-16	6.64452e-17	1.26162e-17	-1.52656e-16	1.93448e-17	-1.68216e-17	4.41566e-18	-4.8362e-18	1.78729e-17	-1.80832e-16	-1.41301e-16	8.20051e-17	-1.96812e-16	7.52765e-17	-2.19627e-16	-2.22255e-16	2.60734e-17	3.44632e-16	2.25829e-16	-5.7719e-17	3.41898e-16	5.80344e-17	2.04803e-16	3.36431e-16	-4.41566e-18	1.38778e-17	-1.56861e-16	4.20539e-17	3.3354e-17	-7.48559e-17	-5.63522e-17	-5.44598e-17	1.45507e-16	-1.40605e-16	-1.60856e-16	-8.58425e-17	2.58632e-16
166	MEM157	-0.00915816	0.0258345	0.0388663	0.00403275	0.0110262	-0.00941907	0.000143722	0.0637247	-0.00687615	2.1868e-17	-6.05576e-17	-3.02788e-17	-2.7335e-17	4.20539e-17	-2.16578e-17	-8.49489e-17	-8.41078e-18	1.05345e-16	-1.50553e-16	-1.66639e-17	5.13058e-17	-2.27091e-17	4.33155e-17	-1.76626e-17	-3.40637e-17	4.34207e-17	4.85723e-17	-7.73792e-17	-9.52521e-17	-2.1027e-18	-2.78607e-18	-4.94133e-17	1.85037e-17	-5.55112e-17	6.30809e-18	-4.22642e-17	1.17751e-17	-5.29879e-17	1.74944e-16	7.58679e-17	9.84061e-17	-5.88755e-18	7.48559e-17	5.0675e-17	7.73398e-17	-1.0177e-16	1.62696e-17	-1.20484e-16
167	MEM158	0.0130668	-0.0144175	0.00565429	0.0393562	-0.0147697	-0.0502634	0.0199214	0.009308	0.0100474	7.99024e-17	9.35699e-17	7.00197e-17	-4.62593e-17	-9.29391e-17	-4.57336e-17	4.07923e-17	1.35834e-16	7.22276e-17	3.37483e-17	1.89505e-17	1.81883e-17	6.09782e-18	-8.78927e-17	-4.66798e-17	-3.33487e-16	-1.41511e-16	-5.42495e-17	1.56861e-16	1.49291e-17	4.3263e-17	-2.81235e-18	2.22202e-16	1.72421e-17	1.05135e-18	8.72618e-17	-1.10076e-16	-4.73106e-17	-1.13546e-16	2.27091e-17	-5.41444e-18	-6.87581e-17	-4.26847e-17	5.7719e-17	-6.85479e-17	-1.24388e-17	1.55389e-16	1.93527e-16	3.40847e-16
168	MEM159	0.032254	-0.0646408	0.000629515	-0.00202759	-0.00963314	-0.010805	0.0354823	-0.0137939	0.0363623	5.25674e-19	5.89017e-17	-2.31034e-17	-1.24322e-17	-5.72459e-17	1.51775e-16	-7.30949e-17	-1.50343e-17	-1.81752e-17	7.63541e-17	8.46499e-17	-1.02244e-17	1.04517e-16	4.24087e-17	1.49817e-17	-6.00582e-18	5.25674e-18	-5.41181e-17	1.30078e-16	1.12934e-16	-1.20077e-16	-3.88342e-18	1.31386e-17	1.42458e-17	6.30809e-17	1.67953e-17	-7.86277e-17	9.89055e-17	3.27048e-16	-4.20013e-17	-1.05363e-16	3.15667e-17	1.83565e-16	-1.60501e-16	-3.05154e-17	-6.72419e-17	-3.24078e-17	-1.07316e-16	-4.29081e-17
169	MEM160	-0.0084184	-0.0357655	0.00767602	-0.0584319	0.000373301	0.00542141	0.00671606	-0.0147465	0.0174862	8.76824e-17	-2.81761e-16	7.99024e-18	-2.35502e-17	-5.76138e-17	1.50343e-17	-7.27533e-17	2.28142e-16	-6.46579e-17	2.89383e-16	-1.75312e-17	1.64273e-16	-3.22764e-17	-2.3834e-16	-3.40637e-17	4.73106e-18	4.74421e-17	-2.44964e-17	3.15404e-18	-1.09393e-16	-6.28706e-17	-1.38936e-16	-2.99371e-16	6.09782e-17	7.34892e-17	-2.18049e-16	3.8637e-17	-1.02191e-16	9.04159e-17	-4.24744e-17	-1.2447e-16	-1.53497e-17	-3.37483e-17	-1.14439e-16	-1.2448e-16	2.21512e-16	-6.02422e-17	9.54689e-17	1.46085e-16
170	MEM161	-0.0293256	0.069299	-0.00402867	-0.0464429	-0.0344311	-0.0294496	-0.0170433	0.0587119	0.0589327	-3.11199e-17	6.4763e-17	5.46175e-17	-1.06134e-16	-1.11127e-16	-3.03708e-17	5.89806e-17	3.78485e-18	-7.68798e-17	-7.55393e-17	3.41885e-17	-1.69898e-16	-1.8162e-17	-5.90332e-17	-2.01859e-17	-3.07256e-17	-1.76672e-16	-2.21571e-17	-3.96621e-17	1.44639e-16	-8.34639e-17	-1.0497e-16	9.29687e-17	-4.45771e-17	7.53291e-17	-4.00038e-17	-3.36694e-17	-4.31053e-18	-5.43547e-17	-1.09971e-16	-5.50676e-17	7.88511e-17	3.26706e-17	3.64161e-17	2.21834e-17	8.70655e-17	4.96762e-17	-2.04849e-18	1.21299e-17
171	MEM162	0.0396472	-0.0627341	-0.0135038	0.0231904	-0.0239033	0.00387598	-0.00232222	-0.00550299	0.0223076	8.56848e-18	6.78382e-17	-6.91261e-17	-1.09472e-16	-1.02769e-16	8.39501e-17	7.75895e-17	-8.33193e-17	-6.07416e-17	-8.27936e-17	-8.33653e-17	8.27936e-18	-1.47662e-16	-4.54182e-17	-2.87018e-17	-1.35742e-16	-6.60706e-18	1.77415e-16	-1.17961e-16	3.38337e-17	5.42167e-17	-2.6218e-18	8.89999e-17	-9.48578e-17	-1.59805e-17	-4.06609e-17	-5.98742e-17	1.79255e-17	-2.13739e-16	-8.00601e-17	1.45691e-16	9.39379e-17	5.01493e-17	2.43256e-17	4.21196e-17	-2.51174e-17	8.62368e-17	2.84825e-17	3.37943e-17
172	MEM163	-0.0148218	0.0897648	0.0119993	0.0209573	-0.0202083	-0.0167084	0.0010297	0.0257455	0.0007346	5.45124e-17	-5.34873e-16	-1.91871e-18	1.75969e-16	7.14916e-17	-1.16397e-16	7.023e-17	2.17103e-17	7.91139e-18	-2.38262e-17	9.94969e-17	-1.0432e-16	-2.60209e-18	7.99813e-17	-5.36187e-17	1.38752e-16	7.61898e-17	3.96621e-17	-2.69145e-17	2.56148e-16	-1.99099e-18	-2.75979e-18	3.9784e-16	-6.9021e-17	4.73106e-19	-2.41757e-16	-5.32508e-17	2.54952e-18	-7.23327e-17	8.21102e-17	9.34295e-17	-3.60349e-17	5.17526e-17	4.41566e-17	5.3645e-17	-1.50874e-16	1.19578e-16	-7.1784e-17	-3.8407e-16
173	MEM164	-0.00802465	-0.00618005	-0.00667572	0.0410569	0.0878448	0.0727856	-0.0704272	-0.0144629	-0.0357874	-2.89121e-17	-7.86408e-17	-3.71651e-17	-2.08692e-17	-1.15123e-17	-1.58622e-17	-6.42373e-17	6.40271e-17	-5.16474e-18	-5.59843e-17	9.70525e-17	-1.11679e-16	8.60791e-17	1.88454e-17	7.30687e-17	-8.97588e-17	-8.34836e-17	-6.06233e-17	-8.12692e-17	1.06055e-17	-2.63625e-17	-2.28537e-17	-4.04375e-17	1.23533e-17	1.82304e-16	1.85353e-16	1.32076e-16	-1.14308e-16	-9.31494e-17	-5.57214e-18	-3.12028e-17	1.44797e-16	-1.03558e-16	-2.97137e-17	3.11462e-17	-2.45777e-17	7.27795e-17	-1.52928e-16	1.93579e-17
174	MEM165	0.0166824	-0.0332188	-0.000187306	-0.0185844	0.0807782	-0.020786	-0.0166334	-0.0536534	-0.0388991	1.85037e-17	2.68041e-16	1.72263e-16	5.25674e-20	-2.33399e-17	-3.09359e-17	6.85479e-17	5.82447e-17	-1.51394e-17	2.16788e-16	4.43997e-17	1.27988e-16	1.24269e-16	7.63804e-17	-1.10602e-16	2.34056e-16	3.84662e-17	5.9664e-18	6.3002e-17	2.58513e-16	1.24861e-16	-6.00977e-17	-1.51982e-16	8.83658e-17	-1.06975e-16	-2.46699e-16	-3.04102e-17	-1.27003e-16	-1.11863e-16	-4.27898e-17	-8.80504e-18	-8.42129e-17	1.13992e-16	-8.39238e-17	-2.92537e-17	9.75125e-18	1.26004e-16	-8.43838e-17	7.95082e-18
175	MEM166	-0.0273516	-0.0150315	-0.00300554	0.055072	-0.0219098	0.0276474	-0.00783016	-0.0651289	-0.0139818	1.85037e-17	-9.84061e-17	-3.95307e-17	5.88755e-17	-2.85967e-17	-4.22642e-17	2.77556e-17	5.04647e-17	5.88755e-17	2.48118e-17	-2.65991e-17	8.15846e-17	-1.78309e-16	-5.00441e-17	-9.42007e-17	-8.0323e-17	4.14231e-17	-8.83132e-18	-4.33155e-17	-1.21956e-17	8.60002e-17	-4.71004e-17	3.42739e-17	-5.04647e-18	4.45771e-17	5.55112e-17	6.72862e-17	-7.14916e-17	-2.69145e-17	3.70074e-17	-2.2788e-17	-4.2895e-17	7.73792e-17	3.70074e-17	4.41566e-17	-2.62968e-17	-5.02544e-17	8.9128e-17	8.09538e-17
176	MEM167	-0.0127171	0.0393666	-0.000869771	0.0311164	0.0269331	0.00121236	0.0346804	-0.0284424	0.0063569	7.61176e-17	1.19643e-16	1.76626e-17	1.04924e-16	-3.02788e-17	5.95063e-17	1.32049e-16	-2.98583e-17	1.58753e-17	-3.10148e-17	-1.00745e-16	8.69464e-17	-9.29391e-17	2.11321e-17	-1.0892e-16	5.99268e-17	-9.63034e-17	-6.8653e-17	1.0135e-16	-5.46701e-18	-3.42214e-17	1.31418e-19	1.53155e-16	8.41078e-19	7.99024e-17	-1.28685e-16	2.36028e-16	-5.88755e-17	-5.76138e-17	-3.11199e-17	-8.56191e-18	1.17751e-17	-6.22398e-17	1.05135e-17	5.1516e-18	2.92077e-17	3.05942e-17	1.80385e-16	3.09201e-16
177	MEM168	0.00046586	0.0568133	0.0128637	0.00661512	0.0162332	-0.0228069	0.0307876	-0.0125868	-0.0654921	7.99024e-17	1.93027e-16	1.3247e-16	1.82934e-17	-3.36431e-18	5.20943e-17	1.08079e-16	1.05135e-17	1.15648e-17	-2.64414e-17	-5.64311e-17	-3.36431e-18	2.62837e-18	2.05013e-17	-1.37516e-16	-2.51693e-16	-7.90876e-17	1.00404e-16	9.18878e-17	-1.57176e-17	1.82934e-17	2.07378e-17	1.73446e-16	7.023e-17	7.04403e-18	-1.23428e-16	-9.69868e-17	1.23954e-16	-6.25552e-17	-5.67728e-17	-6.0781e-18	2.43913e-17	4.12128e-17	-3.87947e-17	-1.07658e-16	-4.79809e-17	3.42739e-17	1.73604e-17	2.24252e-16
178	MEM169	0.00561345	-0.0229571	-0.0112946	0.0593312	-0.0658108	-0.0554454	-0.0142128	-0.0308364	-0.0959156	4.22642e-17	-5.40393e-17	-3.34329e-17	5.17263e-17	-5.95063e-17	3.63241e-17	-7.48559e-17	8.43181e-17	5.12006e-17	-8.84183e-17	-4.03455e-17	6.72862e-18	5.23571e-17	-2.08692e-16	-1.13546e-17	-3.67972e-18	-1.23954e-16	1.03347e-16	1.14597e-17	1.4661e-16	-1.80254e-16	4.75735e-18	1.63747e-16	6.81273e-17	5.29879e-17	-5.1516e-17	-1.03453e-16	-1.74734e-16	5.80344e-17	3.49047e-17	3.60021e-17	1.47609e-16	1.40355e-16	-2.20993e-16	-2.38656e-17	1.88454e-16	-1.57702e-16	5.3783e-17	1.59332e-16
179	MEM170	-0.012661	0.0582597	-0.00374742	0.0360602	0.0803202	0.0225537	0.0314221	-0.00339594	0.00258295	4.6785e-17	1.99756e-18	-5.25674e-20	7.39097e-17	6.41848e-17	-1.08552e-17	-1.89768e-17	5.88755e-17	3.13302e-17	3.43791e-17	1.93448e-17	-9.17038e-17	-6.17667e-19	1.18277e-18	-8.51592e-18	-1.50566e-16	-1.84479e-17	-1.24848e-17	-1.46794e-17	3.78485e-18	7.47705e-17	-3.11133e-17	-4.82684e-17	-2.65202e-17	-5.7719e-17	2.0291e-17	-9.37539e-17	-2.60471e-17	3.9373e-17	2.7335e-17	4.54946e-17	-2.29457e-17	2.74402e-17	4.52934e-17	4.44457e-17	8.89374e-18	4.827e-17	8.94418e-17	2.08495e-17
180	MEM171	0.000388013	0.0778942	0.00567493	0.0428105	0.0522455	-0.0238461	0.0165965	-0.0193029	-0.0522046	-1.06817e-16	-1.07237e-17	-6.51835e-18	-1.97653e-17	1.68216e-18	-6.00319e-17	-2.90172e-17	-7.10711e-17	-8.13743e-17	2.83864e-17	4.20539e-18	4.12128e-17	3.78485e-18	5.02544e-17	-1.47189e-17	8.20051e-17	5.87703e-17	1.83986e-17	3.59561e-17	1.87666e-16	-1.85563e-17	5.78241e-19	7.53028e-17	1.89243e-17	2.81761e-17	-1.34362e-16	1.25951e-16	7.801e-17	-1.39409e-16	-8.41078e-19	9.51732e-17	-2.16578e-16	9.6724e-17	9.69342e-17	3.15404e-18	-3.38074e-17	-1.43404e-16	-2.99371e-17	6.80222e-17
181	MEM172	0.0418531	-0.0135332	0.00657431	-0.00216291	0.0812532	0.0673083	0.0958427	0.0637322	0.0541236	1.10181e-16	-1.57702e-16	-2.77556e-17	4.03717e-17	1.38778e-17	9.53572e-17	-3.32226e-17	9.25186e-18	1.58123e-16	7.35943e-17	9.85113e-17	-3.06993e-17	-9.94575e-17	-3.91101e-17	1.68216e-18	-9.88267e-18	-2.09744e-17	-5.50906e-17	-2.88069e-17	-6.81273e-17	2.6494e-17	-1.39304e-17	-1.46768e-16	-7.94819e-17	1.91345e-17	2.06485e-16	-1.26162e-17	-2.65991e-16	8.83132e-17	1.59805e-17	-1.28678e-16	2.67042e-17	-1.06817e-16	-2.68094e-17	2.94377e-17	4.71135e-18	-1.5192e-16	3.86107e-17	-1.94604e-16
182	MEM173	-0.0140932	-0.032192	0.0195204	-0.00435625	0.00965806	0.00316401	0.0348101	0.012895	-0.0490533	-1.07658e-16	1.64431e-16	2.52323e-18	-3.23815e-17	-8.41078e-19	-8.09538e-17	3.86896e-17	5.3829e-17	-1.14597e-16	8.05332e-17	6.26603e-17	9.09416e-17	4.33155e-17	-9.88267e-18	2.35502e-17	-7.65381e-17	1.10076e-16	-9.65137e-17	-4.92031e-17	-2.14475e-17	-7.52765e-17	-5.06224e-17	1.05923e-16	-9.54624e-17	2.90172e-17	-6.85479e-17	-1.13546e-17	7.99024e-17	-7.52765e-17	5.63522e-17	8.28725e-17	3.57458e-17	9.77753e-17	-2.43913e-17	6.245e-17	-2.7335e-18	6.28706e-17	4.89402e-17	1.20379e-16
183	MEM174	-0.00188883	0.0242742	-0.00645335	-0.0563182	-0.0570441	-0.00710183	-0.0547963	0.168776	0.0121085	2.35502e-16	-1.66533e-16	-5.3829e-17	1.44665e-16	3.36431e-18	-7.90613e-17	-2.59052e-16	-1.34572e-17	6.89684e-17	2.1868e-17	5.34085e-17	3.53253e-17	-3.02788e-17	3.53253e-17	1.07658e-16	2.35502e-16	5.04647e-17	-7.06506e-17	2.01859e-17	8.49489e-17	-2.14475e-17	2.56529e-17	-4.20539e-17	-2.01859e-17	2.85967e-17	2.1868e-17	-5.13058e-17	3.14563e-16	5.04647e-17	-3.36431e-17	6.10833e-17	-8.579e-17	2.52323e-17	-3.36431e-18	8.41078e-19	1.35887e-16	-3.36431e-17	6.09782e-17	-3.20451e-16
184	MEM175	-0.00916951	0.00593601	0.0248289	0.00029765	0.0155164	0.025115	0.0135114	0.0527133	-0.016095	-1.7158e-16	2.68304e-16	-7.5697e-18	3.83021e-32	-1.53076e-16	-5.71933e-17	-3.44842e-17	-1.68216e-17	-1.29105e-16	-1.6359e-16	9.22032e-17	7.27533e-17	7.23327e-17	-1.6401e-17	4.87825e-17	-7.52765e-17	-8.30565e-18	5.08852e-17	-1.02191e-16	4.18436e-17	-1.02822e-16	9.04159e-18	-8.39501e-17	-7.82203e-17	1.05135e-17	-6.72862e-17	9.84061e-17	2.35502e-17	5.29879e-17	3.02788e-17	8.37398e-17	8.83132e-18	6.30809e-17	9.46213e-17	1.26162e-17	-5.84943e-17	-1.07237e-16	8.67099e-17	1.15438e-16
185	MEM176	0.0249083	-0.00786301	-0.017924	0.0518035	0.0444612	0.00369946	-0.0249036	-0.0332724	0.00391448	6.68657e-17	-2.17839e-16	4.2895e-17	1.03032e-17	3.44842e-17	7.28584e-17	-7.99024e-18	-1.76626e-17	5.66676e-17	2.76504e-17	-1.49265e-16	-8.41078e-19	-4.92031e-17	4.62593e-17	-3.02788e-17	-1.2469e-16	1.01035e-16	-6.78119e-17	5.48803e-17	-1.22587e-16	-7.70112e-17	-2.48118e-17	1.12284e-16	8.41078e-17	-6.64452e-17	-2.38446e-16	5.20417e-17	1.93448e-17	-9.88267e-18	2.1868e-17	-1.26556e-17	-1.68216e-16	4.68901e-17	5.76138e-17	-4.06872e-17	-3.97738e-17	8.86286e-17	-8.43706e-18	-6.07679e-17
186	MEM177	-0.0300113	-0.00845306	-0.0012183	0.00836943	-0.027018	-0.0127965	0.0497206	-0.0342994	-0.00253901	1.03873e-16	-1.46768e-16	3.02788e-17	-3.57458e-17	5.04647e-17	2.19206e-17	-1.80832e-17	9.25186e-18	9.08364e-17	-6.93889e-17	1.3197e-16	-1.00929e-17	3.25918e-17	7.14916e-17	-6.72862e-17	-3.61348e-16	2.03252e-16	1.04083e-16	-2.46015e-17	-2.24042e-16	-4.28424e-17	-4.31841e-17	2.17682e-16	1.22377e-16	1.98705e-16	-1.51184e-16	8.84183e-17	-1.30367e-17	-1.45717e-16	-3.82691e-17	2.34904e-16	-1.19538e-16	1.53076e-16	1.93658e-16	-2.0291e-17	-3.54403e-17	-2.39024e-16	-1.63984e-16	-8.70516e-17
187	MEM178	-0.0242588	0.0146319	-0.0107584	-0.040725	-0.033359	-0.0212463	-0.0247722	-0.0207017	-0.100987	1.7137e-17	-2.7335e-18	-1.00561e-16	-5.07801e-17	1.49291e-17	-3.85845e-17	-2.65991e-17	-6.30809e-19	-8.3845e-17	1.1486e-17	-3.73885e-17	2.26565e-17	-4.25796e-17	-1.62433e-17	-8.95748e-17	1.72421e-17	1.57308e-17	-9.15198e-17	7.15968e-17	-1.23271e-17	5.49329e-17	-4.01089e-17	1.15852e-16	4.33155e-17	2.94377e-18	-6.80222e-17	-3.35117e-17	5.17263e-17	4.03717e-17	2.03961e-17	-7.03187e-17	6.11359e-17	-1.39882e-16	1.42458e-17	4.873e-17	1.86039e-17	-9.42533e-17	-1.71787e-16	-7.47508e-17
188	MEM179	-0.00599632	0.0762631	0.0119967	-0.00693467	0.00778362	-0.0115928	0.0455405	0.0770362	-0.00650124	5.49855e-17	-1.16279e-16	1.91871e-16	-3.80325e-17	-5.9664e-17	-5.30011e-17	1.05135e-19	4.77837e-17	4.18305e-17	3.32226e-17	-2.19436e-17	6.09453e-17	7.87722e-17	-8.02967e-18	3.76908e-17	-6.63663e-17	-1.11535e-16	-3.56932e-17	-3.10148e-18	1.49626e-16	-8.50803e-17	7.67812e-18	-3.52661e-17	-1.70318e-17	-1.44613e-16	-4.76523e-17	-2.19101e-16	-1.4435e-16	6.30809e-18	-8.3477e-17	2.12356e-17	-1.67953e-16	-1.45349e-17	-3.20661e-18	-2.9096e-17	-2.98911e-17	4.39332e-17	1.22531e-17	1.27712e-16
189	MEM180	-0.00544597	-0.0203631	-0.00527163	0.0628851	-0.10833	0.0261653	-0.000443459	-0.0135917	-0.0594035	-6.23975e-17	1.85642e-16	3.75857e-18	-5.50118e-17	-1.17436e-16	-1.84906e-17	5.50906e-17	-2.11163e-16	-2.56411e-16	1.85918e-16	-8.27279e-18	-3.04339e-16	-9.56726e-18	-5.69568e-17	-5.1516e-18	1.1528e-16	1.53372e-16	1.6493e-17	-1.28527e-17	-1.47123e-16	1.18704e-16	2.08942e-16	1.5191e-16	-2.47592e-17	3.85845e-17	-2.22859e-16	1.51263e-17	5.50118e-17	-5.62471e-18	-2.87018e-17	-6.4009e-18	7.20699e-17	9.81433e-17	-4.92293e-17	-1.25531e-16	1.18613e-16	3.64949e-17	-9.42418e-17	-5.41838e-17
190	MEM181	0.00797213	0.099787	0.00706994	0.0400032	0.0746491	-0.0388702	0.00126381	-0.00578822	0.00467564	8.71436e-17	-1.53786e-16	5.29682e-17	-8.19723e-17	-7.58284e-17	1.1647e-17	6.21478e-17	1.18934e-17	1.19473e-16	-1.8944e-16	-1.87283e-16	1.1899e-16	6.58801e-17	-4.70149e-17	7.95082e-17	3.29998e-16	-8.94303e-18	8.84972e-17	1.95091e-17	-1.86818e-16	1.10715e-16	-2.13851e-17	-1.67766e-16	5.33033e-17	1.33265e-16	2.34201e-16	3.56834e-17	2.59486e-17	4.78757e-17	1.29079e-16	-7.45023e-17	-3.40637e-17	5.23243e-17	-1.10894e-16	1.86811e-17	1.43899e-16	-6.02816e-17	2.34689e-17	9.95265e-17
191	MEM182	-0.0319097	0.0348203	0.00721919	0.036981	-0.0546156	0.012207	0.0164425	0.0276191	0.0227018	1.33219e-16	-2.19403e-17	6.82062e-18	1.4594e-17	-5.80607e-17	6.58111e-17	1.51525e-16	-2.42533e-16	8.3293e-17	-1.6036e-16	2.65067e-16	-9.29588e-17	5.57214e-17	1.0361e-16	1.41012e-17	1.71567e-17	-5.78044e-17	6.38694e-18	4.2757e-17	-2.7259e-16	-1.27985e-17	-6.6814e-17	-2.17383e-17	-3.49047e-17	-7.86145e-17	2.06439e-16	-9.69244e-17	-9.06984e-17	-5.26725e-17	1.40355e-17	3.48078e-17	-1.19689e-16	6.31794e-17	-6.60608e-17	1.15333e-16	2.35339e-16	3.84793e-17	-6.70275e-18	3.51324e-16
192	MEM183	-0.018585	0.012483	0.00485263	-0.0223812	0.00226685	-0.0662737	-0.00987405	-0.0146976	-0.0296583	-6.64977e-18	1.90557e-17	-3.99052e-17	4.92491e-17	6.19638e-17	-3.33376e-17	6.34751e-17	1.67427e-17	-1.07336e-17	3.45663e-17	-6.29544e-17	1.07267e-16	8.58491e-17	2.83995e-17	-4.52605e-17	-3.07913e-17	1.31184e-16	1.12823e-17	7.49348e-17	2.06853e-17	-6.98703e-17	-1.55139e-17	-1.23952e-16	-3.98592e-17	3.1593e-17	2.16709e-16	-1.5555e-16	2.45049e-16	-4.69295e-17	1.28002e-17	-4.34126e-17	5.0077e-17	1.32733e-16	1.48864e-17	-9.79067e-18	-8.02521e-17	-4.31972e-17	2.91319e-16	-6.02422e-17
193	MEM184	0.00637238	-0.0441912	-0.0122469	0.0147318	-0.085274	0.0353714	-0.0564221	0.00836121	0.00269617	1.71159e-16	4.33155e-17	5.90857e-17	1.48661e-16	-1.10602e-16	7.66432e-17	-6.30809e-18	-1.30367e-17	1.36675e-18	-6.93889e-17	8.60791e-17	2.34451e-17	-1.02401e-16	-2.20783e-17	4.20539e-17	-1.4803e-16	-7.87985e-17	-4.73106e-18	2.58632e-17	7.01249e-17	9.8669e-17	3.11725e-17	5.30405e-17	-7.73792e-17	-1.69267e-16	-2.56529e-17	-8.75773e-17	2.66201e-16	-1.16489e-16	-2.60734e-17	3.01802e-17	-8.09538e-17	7.92716e-17	8.75773e-17	3.1225e-17	8.15451e-17	6.20295e-18	-1.1486e-17	8.38975e-17
194	MEM185	-0.00936902	-0.0200672	-0.00894609	-0.0166449	-0.0765649	0.0476798	0.0224373	0.00468115	0.00555597	-5.60894e-17	-1.46952e-16	-3.95832e-17	-5.67202e-17	1.42983e-17	-1.47097e-16	-8.15057e-17	-1.24795e-16	1.44849e-16	2.56135e-17	1.15027e-16	-2.58894e-17	-6.97306e-17	7.03614e-17	3.02262e-17	-1.30683e-16	6.6248e-17	-9.17301e-18	-1.06331e-16	-3.25129e-17	2.76044e-17	-8.78138e-17	2.46786e-16	-3.44053e-17	-1.13151e-16	1.22771e-16	1.68216e-16	1.49817e-18	-4.55759e-17	5.0675e-17	-1.01163e-16	1.84958e-16	3.87684e-17	-6.07547e-17	1.44705e-16	1.65996e-16	4.72449e-17	4.74125e-17	9.36291e-17
195	MEM186	-0.00740674	-0.0250917	0.00357693	0.0293505	0.0330458	0.0685482	0.0282093	0.0172613	-0.00158059	-1.00929e-17	-2.7335e-17	-6.81273e-17	-5.46701e-18	-1.23638e-16	3.72177e-17	-1.19854e-16	9.25186e-17	-4.64696e-17	-1.78729e-17	-4.72055e-17	-1.04083e-17	4.37361e-17	-4.12128e-17	-3.86896e-17	-3.40637e-17	5.26725e-17	8.01127e-17	-4.64696e-17	-3.11199e-17	-4.32104e-17	-7.2543e-18	2.29457e-17	5.63522e-17	1.00509e-16	-1.00929e-16	5.44598e-17	5.63522e-17	7.5697e-18	-9.25186e-18	1.28527e-17	-3.11199e-17	-5.00441e-17	4.39463e-17	6.53938e-17	2.6218e-18	1.24059e-16	-9.08101e-18	-4.7626e-17
196	MEM187	-0.0484657	0.0173923	-0.0188164	-0.0487193	0.0840087	0.0291024	-0.0132684	0.0278993	-0.012171	-6.33963e-17	-1.8346e-16	3.84268e-17	-1.13493e-16	-5.48803e-17	-1.4506e-16	4.873e-17	5.13058e-17	4.72581e-17	-5.56426e-17	1.62433e-17	4.0766e-17	1.51867e-16	-2.84127e-17	-8.65259e-17	-4.81885e-16	-2.70301e-16	6.5499e-17	8.41078e-19	1.39014e-16	-6.28837e-17	1.56059e-17	1.81762e-16	1.3862e-16	3.55881e-17	-1.17698e-16	9.1073e-17	-8.83132e-17	-5.85601e-17	1.42983e-17	2.99956e-16	-2.39865e-16	1.58044e-16	3.20687e-16	1.85826e-17	-3.2554e-17	-1.85589e-16	-1.38551e-16	2.40601e-16
197	MEM188	-0.00579557	-0.0538038	0.00778059	-0.0131812	-0.00641721	0.00156457	-0.0540103	0.0385897	0.0426426	2.69145e-17	2.35502e-16	2.12372e-17	1.55599e-17	3.02788e-17	4.57336e-17	4.03717e-17	-6.43425e-17	-3.87947e-17	2.13424e-17	-1.50527e-16	8.24782e-17	6.22398e-17	5.5406e-17	-1.03453e-16	-7.21224e-17	1.04083e-17	-2.56529e-17	6.35014e-17	1.96602e-17	6.90735e-17	8.6999e-18	-8.59739e-17	2.98583e-17	-2.52323e-17	4.96236e-17	6.12936e-17	1.31629e-16	-8.91543e-17	2.85967e-17	5.89215e-17	-1.2469e-16	-1.92397e-17	1.58753e-17	-1.0934e-17	-1.07323e-16	-2.2604e-17	-2.70853e-17	-1.53917e-16
198	MEM189	0.0306543	-0.0447445	-0.00969644	-0.00990786	-0.00404081	-0.0363837	0.0289135	-0.0643157	-0.0289147	-8.24256e-17	-2.23727e-16	-1.61908e-17	-8.64208e-17	9.50418e-17	-2.15106e-16	-9.46213e-17	4.16334e-17	1.07763e-16	3.02788e-17	-3.37483e-17	-1.13651e-16	7.77997e-17	-3.67972e-17	1.04294e-16	1.1712e-16	-1.0545e-16	9.60932e-17	5.67728e-17	-1.77573e-16	5.64574e-17	-1.62381e-16	-2.31191e-16	-9.33597e-17	4.43669e-17	-6.39219e-17	1.7137e-17	2.1048e-16	1.90294e-16	-1.61487e-16	-1.86286e-17	3.15404e-17	8.32667e-17	-1.54338e-16	-7.75895e-17	8.69267e-17	1.18592e-16	5.63391e-17	1.35939e-16
199	MEM190	-0.0195757	-0.0213665	-0.0129429	0.047205	0.00322056	0.0415602	0.035509	0.0724188	-0.0893265	3.1961e-17	-1.34572e-17	1.42983e-17	1.64851e-16	6.89684e-17	-1.37937e-16	-2.22045e-16	8.41078e-18	-1.11022e-16	-1.11022e-16	9.60932e-17	6.05576e-17	7.82203e-17	3.53253e-17	-9.42007e-17	5.21468e-17	-6.37117e-17	4.03717e-17	2.52323e-17	-6.43425e-17	-6.95992e-17	-2.48118e-17	-2.57054e-16	-8.41078e-18	5.29879e-17	1.17751e-17	1.0177e-16	2.90172e-16	-1.69898e-16	4.03717e-17	-3.44579e-17	-2.41389e-16	-4.79414e-17	6.51835e-17	-9.42007e-17	-1.63905e-16	3.57458e-17	-7.7274e-17	6.13987e-17
200	MEM191	-0.0085909	0.0221506	-0.000656646	-0.0508396	0.0520046	0.0229707	5.64e-05	-0.0390745	-0.0623217	-4.07923e-17	8.07435e-17	1.3226e-16	-1.61908e-17	7.00197e-17	-9.93523e-18	-1.91345e-17	5.23571e-17	4.41566e-18	7.24378e-17	-1.12231e-17	-2.29404e-16	-1.47189e-16	8.08486e-17	-6.13987e-17	3.37483e-17	-1.31708e-16	-1.33521e-17	-3.10148e-17	4.10026e-18	-1.03269e-16	-1.87666e-17	7.37783e-17	-4.12128e-17	-2.47067e-17	-3.00685e-17	-3.82165e-17	-1.57702e-16	1.53181e-16	1.38778e-17	1.64733e-17	-5.88755e-17	1.8714e-17	-7.68009e-17	-1.23744e-16	-7.19385e-17	7.41726e-17	-1.1896e-16	6.23449e-17
201	MEM192	-0.00171666	-0.0230758	0.0376756	0.0275149	0.0520702	0.0201139	0.0273483	-0.079606	0.00298884	1.9513e-16	-6.72862e-17	1.86719e-16	-8.37859e-33	-3.36431e-18	7.90613e-17	2.08587e-16	1.00929e-17	6.05576e-17	-2.1868e-16	-1.11022e-16	-7.31738e-17	-1.85037e-17	8.41078e-18	1.21115e-16	1.61487e-16	-1.00929e-16	-1.07658e-16	4.54182e-17	5.04647e-18	6.64452e-17	1.02612e-16	-1.71159e-16	-3.02788e-17	2.85967e-17	1.68216e-17	9.08364e-17	-1.85037e-17	1.41301e-16	-1.68216e-16	-3.91627e-17	-2.47277e-16	1.68216e-18	-5.13058e-17	-1.66533e-16	7.22276e-17	1.96812e-16	5.80344e-17	-8.41078e-18
202	MEM193	0.0189692	0.0014932	-0.000172085	0.0161337	-0.000808042	-0.0211824	-0.0047611	0.00522114	-0.00598786	-1.89243e-18	2.36553e-18	5.35136e-17	-2.15526e-18	-1.12704e-16	5.87966e-17	4.65221e-17	2.4181e-17	2.28931e-17	-2.76767e-17	-3.42739e-17	1.21431e-17	-7.23853e-17	-7.03614e-17	4.94133e-18	4.92031e-17	9.31757e-18	-1.87928e-17	2.23411e-17	-1.64799e-17	-7.59336e-17	-1.27147e-17	-4.99489e-17	-2.29719e-17	7.04929e-17	1.85563e-17	-2.85441e-17	2.70196e-17	-5.59843e-17	-3.78485e-18	-8.58195e-17	1.28107e-16	-4.46823e-19	-6.83376e-17	-1.52445e-18	7.1853e-18	-4.84671e-17	3.7382e-17	4.19225e-17
203	MEM194	0.00430973	0.0152728	-0.0569605	-0.0403207	0.0173187	-0.0124877	-0.000176975	-0.10525	0.00817044	3.36431e-17	-5.10534e-16	-7.90613e-17	-1.44665e-16	9.08364e-17	-2.1027e-17	3.36431e-18	-9.92472e-17	-1.95551e-16	2.56529e-17	3.01737e-17	-5.13058e-17	-1.1733e-16	-4.16334e-17	1.68216e-17	2.83023e-16	-1.06396e-16	-1.00929e-16	2.7335e-16	-1.46978e-16	-4.81517e-17	3.20661e-17	-2.49642e-16	7.90613e-17	-1.0934e-16	3.11199e-17	-2.32558e-16	-3.95307e-17	2.27091e-17	-2.22045e-16	-7.19647e-17	1.07658e-16	4.20539e-19	1.08499e-16	-2.08167e-16	-2.47067e-18	-1.74944e-16	3.6169e-16	1.60646e-16
204	MEM195	0.00206294	-0.0102176	0.0030582	-0.0555938	0.0350998	0.031662	0.00761033	-0.00886421	0.0248666	2.62837e-19	-1.2879e-17	2.18417e-17	-5.69042e-17	-3.10148e-17	-3.33146e-17	2.12372e-17	-3.47996e-17	-4.64301e-17	2.36947e-17	-5.06585e-17	9.49367e-17	1.98442e-17	-5.31588e-17	-1.02979e-16	2.07641e-18	-1.96602e-17	-2.12504e-17	-1.97128e-18	6.69183e-17	-9.03962e-17	-2.01464e-17	2.8117e-17	-4.33155e-17	-3.62452e-17	-9.16249e-17	9.20323e-17	-3.55355e-17	-5.99268e-18	9.40956e-18	1.03646e-16	-7.05717e-17	5.38816e-19	-1.30236e-16	-5.58397e-17	4.75874e-17	-6.51047e-17	2.3818e-17	2.26697e-17
205	MEM196	0.0369499	0.00186151	-0.0065592	0.051499	-0.00892003	0.00334041	-0.0197643	-0.00970969	-0.0440367	6.09782e-17	-3.77171e-17	3.23552e-17	2.76504e-17	-1.31944e-17	9.9878e-19	-7.88511e-18	-3.2802e-17	-1.23284e-16	5.30273e-17	-1.24312e-16	-5.86455e-17	2.68094e-18	1.03058e-16	-1.66008e-16	9.87478e-17	-6.43293e-17	3.65738e-17	1.32154e-16	1.35328e-16	-4.1134e-17	2.88398e-17	1.63452e-18	-6.2818e-18	-6.53938e-17	-8.67887e-17	-1.98402e-16	-3.24183e-16	-9.31231e-17	-8.66836e-17	1.67338e-16	5.55637e-17	-1.14465e-16	-5.94208e-17	-8.38975e-17	-7.79106e-18	1.42944e-16	3.41203e-17	-9.13555e-17
206	MEM197	-0.0124409	0.0104364	0.0182058	0.0464471	0.0216769	-0.0498217	0.0162688	0.00569353	-0.00185372	-7.28058e-17	-6.4395e-17	7.54342e-18	-5.00179e-17	1.78729e-18	-7.77866e-17	-1.41932e-18	1.50448e-16	-8.73801e-17	2.23411e-18	6.5499e-17	1.13999e-16	1.38725e-16	-7.88379e-17	-8.62631e-17	-4.37098e-17	-6.55121e-18	3.08439e-17	1.9082e-17	1.23461e-16	-8.28988e-17	-8.36577e-17	-2.43745e-16	7.09397e-17	-2.8439e-17	-2.48486e-16	3.7428e-17	-7.61176e-17	-2.85967e-17	-3.20661e-18	1.85119e-17	2.74665e-17	-9.94312e-17	-5.36056e-17	7.58679e-17	-2.26397e-16	3.63372e-17	-1.79656e-16	3.2511e-16
207	MEM198	-0.00237799	-0.024462	-0.000255875	0.000955482	0.00344136	-0.0825157	-0.0193111	-0.00108564	0.0455707	1.92364e-17	2.14376e-17	6.20541e-17	-1.61152e-17	2.49104e-17	-5.16376e-17	-5.14782e-17	2.29982e-18	6.53248e-17	-3.33532e-17	8.74649e-17	8.60581e-17	-7.34366e-17	-1.05193e-16	6.67507e-17	-2.99059e-18	7.96897e-17	-6.03416e-17	2.253e-17	-4.03652e-17	-2.17563e-17	1.2431e-16	1.24118e-16	-7.31393e-17	6.69906e-18	-5.76188e-17	-1.27981e-16	-3.9281e-17	2.13463e-16	-5.57674e-17	3.21731e-17	-7.92913e-17	-5.2528e-17	-2.95527e-18	1.02459e-16	-6.26082e-17	-2.24972e-16	2.22275e-16	-2.06406e-16
208	MEM199	0.0150498	-0.12111	-0.00312248	-0.00464998	-0.0253717	0.0407592	-0.0216358	-0.0228224	0.0166219	-8.75641e-17	-3.81376e-17	4.80926e-17	-2.95429e-17	5.21074e-17	-4.98766e-17	-1.86614e-18	5.52877e-17	4.07069e-17	2.32545e-17	-2.0806e-17	1.97653e-17	-3.26443e-17	-5.90332e-17	-3.6508e-17	-2.68455e-16	-1.56142e-16	-1.15875e-16	-7.48888e-17	-9.04487e-18	7.92585e-17	-2.04389e-17	2.49371e-16	-2.56792e-17	-8.45086e-17	-1.61842e-17	-5.62241e-17	4.72975e-17	8.65785e-17	6.726e-17	8.5485e-17	7.87722e-17	-1.35361e-18	1.00239e-17	3.35577e-17	-6.8623e-18	-8.79617e-17	-1.27312e-16	2.31819e-16
209	MEM200	0.0165073	-0.100435	0.00519741	0.0150637	0.0373894	0.00306242	-0.00892004	-0.0443431	-0.00278687	7.1853e-17	6.95171e-17	-4.70264e-17	5.77026e-17	5.68385e-18	2.68439e-17	-2.13654e-17	-9.28471e-18	-1.23123e-17	2.1404e-17	7.74543e-17	-5.21509e-17	5.88829e-17	-8.7615e-18	4.67883e-17	5.38052e-17	1.03139e-16	2.0191e-16	3.4407e-17	-2.69022e-17	-8.29291e-18	2.56942e-17	-8.29339e-17	2.31132e-18	-1.74327e-17	2.21571e-17	2.00002e-17	-6.22127e-17	3.34378e-17	-4.84638e-17	9.6411e-17	-1.25533e-16	-1.72815e-17	3.0855e-17	4.09352e-17	6.06764e-17	5.82447e-17	1.88004e-17	-1.68862e-16
210	MEM201	0.0109865	0.03248	-0.0148169	-0.0357572	0.0195314	-0.0241892	0.0353493	-0.00719999	0.0173587	-1.17212e-16	-1.72283e-16	-3.79471e-17	3.33146e-18	4.93871e-17	2.15313e-16	-5.46766e-17	-2.4641e-17	2.17616e-16	-2.57613e-17	-4.8541e-17	1.97292e-16	1.10759e-16	2.41547e-17	1.11364e-16	8.4962e-18	-1.16979e-17	-8.43411e-17	-2.43078e-16	-1.56603e-16	-1.01192e-16	-1.10659e-16	1.16679e-17	-1.76824e-17	6.04788e-17	4.92819e-17	-5.147e-17	1.82297e-16	-3.78157e-17	6.88633e-17	1.41131e-17	-9.8439e-17	6.16287e-17	1.24486e-16	9.49433e-17	1.14098e-16	-2.35272e-17	-6.47277e-18	2.99826e-16
211	MEM202	0.0118313	0.0175789	-0.00351677	0.0524452	0.0235569	-0.00460419	0.0409555	0.0109281	0.0438645	3.96424e-17	-1.75422e-16	-2.56595e-17	-6.17092e-17	-1.35131e-16	5.5321e-17	4.29492e-17	2.41679e-17	7.80203e-17	9.85885e-18	1.06013e-16	-9.8678e-17	-1.55681e-16	2.54935e-17	4.68277e-17	1.53552e-16	-9.45853e-17	7.09849e-17	-1.13709e-16	-1.97363e-16	-5.10536e-17	-5.57393e-17	-1.06634e-16	-5.7489e-17	8.11419e-17	3.11258e-16	-7.03179e-17	-8.1946e-17	-8.42392e-18	5.18807e-17	-1.90534e-16	9.09991e-18	-1.91361e-16	7.41952e-17	8.17226e-17	1.73347e-16	-6.02385e-17	1.3545e-17	1.67673e-16
212	MEM203	-0.00598328	-0.0387507	-0.00631159	-0.0249004	0.037041	-0.013083	-0.0187957	-0.00863425	0.011137	-1.2009e-16	-1.31701e-16	8.57505e-18	1.04915e-16	7.19516e-18	5.1516e-17	5.83892e-17	7.01315e-17	-3.71931e-17	-2.15543e-17	2.90069e-17	-9.62739e-17	-3.51544e-18	1.01713e-16	-1.04083e-17	2.40331e-17	4.85205e-17	-5.89675e-17	1.5146e-17	2.75104e-16	1.52091e-16	-7.03499e-18	-6.24106e-17	2.10434e-17	-5.07867e-17	-6.17864e-17	-1.31313e-16	1.10819e-17	1.90402e-16	2.12569e-17	-5.00811e-17	1.07139e-16	-1.25064e-16	2.64972e-18	6.96025e-17	-1.00587e-16	4.87907e-17	-1.50975e-17	-1.17197e-16
213	MEM204	0.0477111	-0.00288777	-0.000170302	0.00976589	-0.0991981	-0.0701017	-0.0339383	0.0355746	0.0226595	6.96403e-17	4.93731e-17	-4.78486e-18	-6.78325e-18	-3.73787e-17	3.28661e-17	-2.36512e-17	8.16191e-18	-3.4906e-18	-4.5841e-17	-7.57021e-17	6.00738e-17	6.1234e-17	-1.40543e-16	4.6785e-17	-2.4503e-17	-1.48236e-16	1.45629e-16	-2.43863e-17	-2.51081e-16	8.14726e-17	-6.23592e-17	-4.18193e-17	-1.98237e-17	-4.41488e-17	3.48205e-17	1.18183e-16	-2.01977e-16	1.41857e-16	1.9997e-17	-2.60437e-16	-6.30784e-17	1.05256e-16	-1.77524e-17	-9.81527e-17	2.186e-16	1.32878e-16	1.43753e-16	9.89877e-17
214	MEM205	0.00482982	-0.0220279	0.00175491	-0.0288515	0.00625983	-0.0473143	-0.032415	0.0123203	0.0556835	-1.82856e-16	-2.94509e-17	1.1578e-17	1.50027e-16	2.30245e-17	1.76745e-16	2.52981e-17	-2.18943e-17	-1.27147e-17	2.70459e-17	-2.68094e-17	-7.89792e-17	-7.16099e-17	-1.44199e-16	1.07553e-16	-2.00571e-16	-1.63015e-16	2.05538e-17	1.43049e-17	-1.05135e-18	-6.59721e-18	-1.34453e-16	1.87213e-16	-1.74918e-17	-4.15677e-17	-4.48137e-17	2.04855e-16	-6.92312e-17	-6.51573e-17	4.83883e-17	-1.73674e-17	-1.00088e-16	3.65869e-17	1.52758e-16	3.5437e-17	-1.14792e-16	1.19525e-17	6.72743e-17	-1.32907e-16
215	MEM206	0.027285	0.017828	0.0126498	0.021554	-0.0116784	0.0723733	0.0077677	0.0601181	0.00243447	8.21102e-17	1.31418e-17	2.54952e-17	-9.33071e-17	1.0955e-16	-1.10155e-16	5.81395e-17	-5.46701e-17	7.88511e-20	1.49554e-17	3.56275e-17	-9.40693e-17	-1.63379e-16	-7.35943e-19	-5.46701e-18	-2.59683e-17	1.23533e-18	1.00929e-16	-3.78485e-18	-6.726e-17	6.04525e-18	1.90294e-17	-2.39103e-16	-2.62837e-17	1.53497e-17	1.14071e-16	1.85668e-16	-9.86164e-17	3.31174e-17	-9.25186e-17	-3.3055e-17	-3.79011e-17	-1.19854e-17	-1.61119e-17	-3.14353e-17	-2.61408e-17	1.46006e-16	8.73933e-18	1.13151e-16
216	MEM207	0.0590405	0.019579	-0.00805137	-0.00843543	-0.0332824	0.0585682	-0.0148405	-0.0179875	0.0028038	-1.15333e-16	-8.37793e-18	-2.87412e-17	2.88661e-17	3.3906e-18	2.41711e-17	7.32001e-18	-5.65231e-17	7.17873e-18	-7.11335e-17	-4.93345e-17	-4.25402e-17	3.05351e-17	-2.79921e-18	1.1486e-17	1.41097e-16	6.12476e-17	3.23618e-18	1.54417e-17	9.91749e-17	1.26712e-16	-2.14639e-17	1.74622e-16	-2.97663e-18	2.95297e-17	5.79884e-17	-1.95551e-17	-3.69023e-17	8.08881e-18	4.10551e-17	-7.07009e-17	-3.64686e-17	1.49091e-16	4.45574e-17	-1.46564e-17	-9.69238e-17	-1.78302e-17	2.24225e-17	-1.41748e-16
217	MEM208	-0.0206546	-0.0268123	-0.000843888	-0.0171625	-0.00765601	0.0741179	0.060858	-0.0241999	-0.0247307	2.64299e-17	2.20454e-18	7.31262e-18	8.64627e-17	6.94645e-17	-7.36108e-18	-4.90257e-17	4.06855e-17	1.83624e-17	5.50007e-17	9.08917e-17	2.67831e-17	-2.39264e-17	1.82483e-17	3.78649e-17	1.05763e-16	2.39069e-17	7.73233e-18	4.95891e-17	5.28195e-17	-6.73037e-17	5.18158e-18	3.14738e-17	-6.31893e-17	-1.06008e-16	4.07463e-17	2.08861e-16	-3.75922e-17	-3.78189e-17	2.00413e-18	-2.3884e-17	-1.0689e-16	4.00752e-17	1.12445e-18	3.9382e-17	-2.28151e-17	4.07919e-17	-5.73005e-17	-2.33711e-17
218	MEM209	-0.0119505	0.0192177	-0.000256727	-0.032994	0.00507647	-0.00189962	-0.0247933	0.00173351	-0.0398276	-1.88112e-16	1.80746e-16	6.63992e-17	7.24313e-17	-7.73529e-17	1.25638e-16	1.13966e-16	3.71783e-17	-1.14252e-17	-9.73614e-17	5.605e-18	-1.90064e-18	-1.75214e-17	-6.30973e-17	-4.77049e-18	8.25308e-17	-5.68212e-17	2.77523e-17	2.25744e-17	2.30477e-16	-5.7351e-17	-3.99512e-18	-1.70437e-16	1.35624e-17	2.63494e-18	3.89919e-17	1.03361e-17	9.26927e-17	-3.95241e-17	1.70844e-19	2.48294e-17	1.05135e-18	-1.37904e-16	-4.19931e-17	2.14114e-17	-1.54296e-17	8.17373e-17	-8.14515e-17	-5.46389e-17
219	MEM210	0.00339312	0.0664449	-0.00666734	0.0346612	-0.0147885	-0.00537302	0.0431285	0.0238911	-0.0048852	1.57439e-17	-3.61992e-17	4.16465e-17	-4.31053e-17	-8.3017e-17	-1.167e-16	3.10148e-17	4.9939e-17	-4.63217e-17	4.69952e-17	-2.55773e-18	2.57843e-17	2.32414e-17	-1.78203e-17	-4.26847e-17	1.92173e-16	4.69624e-17	2.48874e-17	4.22116e-17	3.50362e-17	1.71041e-17	-5.83826e-18	1.21148e-16	-2.44438e-18	-1.98836e-17	2.02844e-17	2.44964e-16	-2.72036e-17	-7.17742e-17	1.4272e-17	6.98894e-17	-7.82597e-18	1.22824e-16	-1.66737e-17	-4.74421e-18	3.21115e-17	-1.22909e-16	8.76631e-17	-5.59251e-17
220	MEM211	0.014267	0.036689	0.00453046	0.0195986	-0.0257978	0.00861973	0.0506323	-0.00761893	0.0206412	1.12672e-16	-1.63209e-16	-7.19286e-17	1.8576e-17	1.12047e-16	-1.07941e-16	6.62349e-18	-1.66967e-17	-9.62772e-17	-5.16031e-17	1.0149e-16	-9.80135e-17	-2.43338e-16	-2.47954e-17	-2.96086e-17	1.43065e-16	5.18158e-17	6.0597e-17	-9.05506e-17	1.9562e-16	-3.34723e-17	-5.69124e-18	9.45597e-18	3.65672e-17	6.30447e-17	1.1486e-17	-7.15015e-17	2.40056e-16	2.78213e-17	5.81264e-17	6.93035e-17	-7.14916e-18	1.20836e-16	5.98085e-17	-2.54525e-17	-1.94363e-17	-3.75528e-17	-1.02442e-16	-3.22156e-17
221	MEM212	-0.013209	-0.068932	0.00690753	0.00650119	0.00692059	-0.00629311	0.0405326	0.0260806	0.050714	3.91706e-16	-5.6577e-16	-6.20558e-17	1.41459e-16	-1.54811e-17	-9.47001e-17	1.76101e-17	-7.65907e-17	-2.20349e-16	3.95241e-17	4.335e-17	-6.85676e-18	-8.78007e-17	4.05229e-17	-3.61926e-17	2.64808e-18	-4.07529e-17	4.74026e-17	5.41444e-17	9.92242e-17	3.76185e-18	3.84284e-17	-7.1191e-17	4.61542e-17	-6.22135e-17	5.50512e-17	-4.00498e-17	3.15404e-18	-7.62621e-17	1.45401e-16	2.06191e-17	-5.12401e-17	4.57336e-18	6.7076e-17	-1.68117e-16	1.2896e-16	-1.0658e-17	-6.88994e-17	-1.99789e-16
222	MEM213	-0.0227162	-0.00474738	0.025504	0.015302	0.0129997	0.00125863	0.0182793	0.0187191	-0.00208701	-4.20539e-19	-7.99024e-18	3.50624e-17	2.928e-17	-4.26847e-17	-1.96339e-17	5.18314e-17	-6.32911e-17	-1.12231e-17	-5.02018e-17	9.00479e-17	-2.03961e-17	-7.22276e-17	1.30735e-16	3.99512e-17	1.99283e-16	1.11942e-16	6.43425e-17	1.30945e-16	2.68856e-16	-1.22219e-18	-1.08473e-16	-1.15274e-16	-9.10467e-17	-1.16069e-16	1.32995e-16	-7.21487e-17	-3.28546e-17	-7.77997e-17	-4.68901e-17	-3.03314e-17	-2.74402e-17	-9.88267e-17	-1.15123e-17	-3.00685e-17	1.46123e-16	2.15106e-16	2.55675e-17	-5.75087e-17
223	MEM214	0.00531273	-0.0266548	-0.00392978	0.0369166	0.0162899	0.0187542	-0.0334076	-0.0301433	-0.0608994	2.21834e-17	1.51788e-17	2.76258e-17	-1.05314e-16	-2.18647e-17	-4.272e-17	3.20464e-17	3.45499e-17	8.45349e-18	-2.84923e-17	-2.02984e-17	-4.90265e-17	9.02976e-17	5.46865e-18	4.46757e-17	-5.06996e-17	-7.28198e-17	-3.19166e-17	1.96306e-17	-5.99654e-17	-1.00497e-16	4.27065e-17	1.06464e-16	-2.16512e-17	-1.60873e-17	9.32151e-17	1.48403e-16	1.66392e-17	1.47603e-16	-1.17291e-17	-5.87822e-17	-1.09462e-16	8.38318e-17	1.16473e-16	6.87253e-17	-7.41972e-17	-1.45102e-16	6.80199e-17	1.32011e-16
224	MEM215	-0.0250989	-0.0789732	0.00254643	-0.0222561	0.0259132	0.0765489	0.0608983	-0.0705485	-0.0322235	-1.4456e-18	3.87684e-18	-2.62574e-17	-3.13959e-17	4.81254e-17	-2.22886e-17	7.26087e-17	-7.99024e-18	-5.04187e-17	-1.78926e-17	-3.93204e-17	-3.60678e-17	7.31081e-17	-6.04459e-17	2.01859e-17	1.51276e-16	-1.34661e-16	3.12185e-17	-3.00948e-18	-2.54393e-17	1.01028e-17	-4.53854e-17	-1.45431e-17	2.52061e-17	-4.53394e-17	1.2695e-16	3.00074e-16	3.49573e-17	-1.34126e-16	-2.94377e-18	4.14658e-17	-1.21273e-16	-4.90059e-17	-1.01659e-16	-5.18314e-17	8.26696e-17	-9.49498e-18	6.56961e-17	-1.716e-17
225	MEM216	0.0154418	0.0215154	-0.0065167	0.0541745	0.0310302	-0.0479192	-0.0214907	0.0486442	0.00804341	-5.21468e-17	-6.60246e-17	-1.2695e-16	-2.78607e-18	8.85235e-17	4.98864e-17	-2.13949e-17	1.86089e-17	6.15038e-18	5.95588e-17	-4.2481e-17	-5.99268e-18	1.33521e-16	3.69549e-17	2.90172e-17	-2.78607e-18	1.55139e-16	6.44213e-17	-8.40027e-17	1.40355e-17	-1.56257e-17	-1.00791e-16	-1.66067e-16	-3.73754e-17	-2.52323e-17	2.47067e-17	-8.48963e-18	-4.52342e-17	-1.33679e-16	4.88877e-17	-2.33251e-17	7.08608e-17	1.03873e-16	-1.00535e-17	-6.32648e-17	3.28564e-16	-2.41284e-17	-1.17582e-16	-6.35934e-17
226	MEM217	0.00834491	0.0127937	0.0167757	-0.0765778	0.0299839	0.00994393	0.00220868	-0.0062553	0.0353363	6.62349e-17	7.87459e-17	1.66533e-16	1.30052e-16	-6.68657e-17	-3.49836e-17	1.07973e-16	3.97409e-17	8.81555e-17	7.85357e-17	-9.24923e-17	7.41463e-17	-5.25148e-17	5.81921e-17	3.84793e-17	-7.59073e-17	-4.95842e-17	-1.55074e-17	8.93645e-19	5.77715e-17	4.3079e-17	4.2435e-17	1.34356e-16	-2.49169e-17	-5.88755e-17	-1.68216e-18	3.26601e-16	-1.10391e-18	4.59439e-17	-2.05433e-16	-1.56059e-17	-7.80626e-17	7.55393e-17	3.31437e-17	1.80201e-16	-8.84413e-17	1.69004e-17	-9.6609e-17	7.86934e-17
227	MEM218	-0.0169599	0.00544388	0.0393568	-0.0351291	-0.0117069	-0.0561682	0.0173805	0.00220974	-0.100694	-3.19084e-17	-3.09017e-16	-1.65062e-17	-7.60913e-17	-3.94255e-17	2.61628e-16	9.90369e-17	-4.89402e-17	2.02516e-17	-7.33578e-17	-3.21811e-17	-6.64583e-17	2.37079e-17	-9.12833e-17	-5.99268e-18	-3.61664e-17	-1.82146e-17	-6.88895e-17	-1.02638e-16	-8.99559e-17	6.17995e-17	-5.30208e-17	5.25542e-17	2.09218e-17	1.57702e-19	-7.96396e-18	1.21444e-16	-1.4732e-16	1.16069e-16	-2.04908e-16	5.5719e-17	7.412e-18	-2.56529e-17	-2.67305e-17	-1.61724e-16	-9.85293e-17	6.04525e-17	6.90292e-17	-3.73491e-17
228	MEM219	-0.0273427	-0.00337781	0.0226877	-0.0634736	0.00482545	-0.0794326	-0.0416307	-0.0165455	-0.00573999	-7.33841e-17	-6.81273e-17	4.52605e-17	7.62227e-17	-3.97409e-17	8.15846e-17	1.06186e-17	-4.96236e-17	-6.51573e-17	4.15282e-18	4.6785e-17	1.47451e-17	9.37276e-17	-4.2895e-17	-1.47189e-17	-4.92556e-17	6.12804e-17	-9.19929e-18	-6.00319e-17	1.62959e-16	-1.29763e-16	9.02845e-17	4.95053e-17	6.09782e-18	-3.04365e-17	-4.23693e-17	-1.11233e-16	5.20417e-17	1.37306e-16	-1.76206e-16	-7.31738e-17	1.25636e-16	1.33311e-16	9.11255e-17	-2.72825e-17	-3.10263e-17	-5.45387e-17	1.57029e-16	-5.49592e-17
229	MEM220	-0.0257268	-0.032792	-0.00821999	-0.021196	-0.00607735	0.0413381	0.0189846	-0.000903463	0.00735051	4.84671e-17	3.1892e-17	7.30687e-18	-4.36638e-17	6.05182e-17	-2.4411e-18	9.73154e-18	-2.27091e-17	-2.22984e-17	-5.16474e-17	1.47967e-16	1.54578e-16	1.82343e-18	3.19084e-17	-8.48503e-17	6.18652e-17	-1.60487e-16	9.50812e-17	9.02188e-18	-1.57382e-17	4.43291e-17	-8.48236e-17	8.78779e-18	6.29494e-18	4.72679e-17	3.38271e-17	-1.25915e-17	6.57421e-17	-2.04494e-16	3.40374e-17	8.96895e-17	1.14649e-16	7.76354e-17	8.40257e-18	2.26976e-17	8.82773e-17	-3.07404e-17	-1.14277e-17	2.28824e-17
230	MEM221	-0.0108534	0.0309564	-0.00308896	-0.0748655	0.0711718	-0.0914607	-0.0367547	0.0526119	0.109358	-6.41848e-17	1.74734e-16	-6.3186e-17	-4.41566e-17	6.17667e-17	-1.83368e-16	6.19769e-17	2.29194e-17	7.52371e-17	-5.85469e-17	-5.81461e-17	7.82071e-17	-6.99146e-17	-9.50418e-17	-8.08486e-17	-2.29404e-16	4.73501e-17	2.62837e-20	2.65728e-17	4.12654e-17	2.81893e-18	9.40628e-17	-8.36413e-17	-4.30001e-17	9.59355e-18	1.68216e-18	2.05118e-16	-6.78908e-17	-9.37276e-17	1.69372e-16	-2.43535e-17	-6.72074e-17	2.34267e-16	-6.45002e-17	3.5667e-17	-2.1781e-17	8.35558e-17	3.78502e-17	1.93579e-17
231	MEM222	0.0182752	-0.0353509	-0.00480416	0.0304109	-0.0184942	0.13295	0.057807	-0.00314301	0.024771	-5.98742e-17	1.97062e-16	-4.31053e-17	-2.4641e-17	4.58388e-17	6.70234e-19	-1.0252e-16	2.13949e-17	-1.25702e-17	1.48187e-16	5.67728e-17	3.16423e-17	5.1884e-17	-6.59983e-17	4.10026e-17	-1.43391e-16	4.94955e-17	-1.56585e-17	6.22923e-17	-1.21519e-16	4.00826e-18	-6.37051e-17	3.03419e-16	8.83132e-18	6.41322e-17	-1.64878e-16	-8.57505e-17	2.87478e-17	-1.121e-17	1.26267e-16	-1.44786e-16	1.83329e-17	2.16683e-16	5.94011e-18	5.01493e-17	2.8233e-17	3.99643e-17	1.08528e-16	-5.01953e-17
232	MEM223	-0.0108987	0.00601321	-0.014865	0.00832081	-0.0329319	-0.0152448	-0.0301482	0.0226018	-0.000319587	7.5697e-18	-4.16334e-17	-5.78241e-17	1.8714e-17	-1.6401e-17	4.15282e-17	-1.08499e-16	2.14475e-17	-2.36553e-17	-1.11443e-17	-4.15545e-17	-9.46213e-18	-1.20064e-16	-9.6724e-18	-5.59317e-17	-2.69145e-17	2.28668e-17	5.34085e-17	-2.85967e-17	2.6494e-17	3.35906e-17	1.34572e-17	-8.38975e-17	-3.99512e-17	-3.42739e-17	-5.86652e-17	-1.06186e-17	-3.78485e-17	1.13966e-16	4.07923e-17	-9.72496e-17	-1.59805e-17	-5.03595e-17	2.1027e-19	-2.54426e-17	6.97372e-17	-7.26481e-17	-2.56003e-17	3.67972e-18
233	MEM224	0.0213705	-0.0426085	0.104598	-0.051187	0.0200648	-0.0112609	0.0144608	-0.029577	-0.00572584	3.36431e-17	1.12704e-16	-2.52323e-17	3.36431e-17	-6.72862e-17	3.53253e-17	9.08364e-17	7.40149e-17	2.36343e-16	4.37361e-17	-2.05644e-16	-1.53076e-16	-2.11952e-16	8.32667e-17	-1.04294e-16	-7.5697e-17	1.02191e-16	-1.54758e-16	-6.89684e-17	1.03873e-16	5.34085e-17	-5.84549e-17	-5.34085e-17	-1.98494e-16	2.35502e-17	1.96812e-16	-2.22045e-16	2.35502e-17	1.22797e-16	-5.04647e-16	-3.60087e-17	8.579e-17	2.54006e-16	-3.2802e-16	1.62328e-16	1.26425e-16	-2.94377e-16	2.16157e-16	4.2895e-17
234	MEM225	-0.00467458	0.0293452	-0.0262865	0.0258999	-0.0239971	-0.00166701	-0.0114405	0.0314134	0.00629428	1.16069e-16	-9.2098e-17	-3.02788e-17	-2.56529e-17	9.25186e-18	4.16334e-17	3.86896e-17	-1.42983e-17	-3.15404e-18	-1.65482e-16	-4.37361e-17	-1.00929e-17	-1.93448e-17	-4.54182e-17	-9.58829e-17	-5.46701e-18	-2.27091e-17	5.29879e-17	2.56529e-17	1.00929e-16	-9.27289e-17	-2.66517e-17	2.30718e-16	4.2895e-17	3.2802e-17	9.29391e-17	3.50519e-16	1.51815e-16	-2.52323e-18	-4.03717e-17	-1.52708e-17	7.82203e-17	-5.88755e-17	1.66113e-16	-9.86164e-17	-6.14907e-17	6.11884e-17	-8.83395e-17	1.28054e-16
235	MEM226	0.0112226	-0.0573959	-0.00252826	0.0285914	0.00850286	-0.000344125	0.0219433	-0.0386018	0.0397532	8.579e-17	-7.88511e-17	-4.35258e-17	-2.27091e-17	5.46701e-18	-8.65259e-17	3.70074e-17	-3.2802e-17	-5.83498e-17	4.73106e-17	-7.96396e-18	-5.67728e-18	-1.1691e-16	6.30809e-17	-1.17751e-17	-2.77556e-17	4.20013e-17	-9.46213e-17	6.89684e-17	-2.92275e-17	4.94659e-17	6.57092e-19	6.22398e-17	-3.99512e-17	-4.47874e-17	4.98339e-17	2.16578e-17	1.82934e-17	-1.3289e-16	8.41078e-19	8.50146e-17	-5.46701e-18	5.31982e-17	-9.46213e-18	-8.83132e-17	6.69774e-17	9.22032e-17	-3.32226e-17	3.71651e-17
236	MEM227	0.0230425	-0.0212546	0.00566078	-0.00671347	-0.0811995	-0.0372254	-0.0383691	-0.0352584	0.00575046	8.27411e-17	-9.31231e-17	-9.31757e-18	8.84709e-17	-1.67427e-17	8.75641e-17	-7.6617e-18	7.0782e-17	1.37037e-17	1.41209e-17	5.67333e-17	1.1372e-16	-6.14316e-17	7.89825e-17	-1.24585e-17	-2.43453e-17	1.26891e-16	-6.71745e-17	-2.4641e-18	6.1011e-17	2.98188e-17	-4.77049e-17	4.53648e-17	-2.44307e-17	-3.3124e-17	2.99371e-17	-2.20698e-16	2.2144e-18	-5.5038e-17	-7.73792e-17	1.7157e-16	6.31991e-17	7.37126e-17	-3.44218e-17	-5.4992e-17	-5.40315e-18	-3.93598e-17	4.90622e-17	8.50113e-17
237	MEM228	0.00558937	-0.00986115	0.00122263	-0.000170351	-0.00700731	0.0550176	0.0583213	-0.0564081	-0.0331046	-1.47189e-17	2.40233e-17	-3.04891e-18	-6.1609e-17	7.36995e-17	-1.89243e-17	-8.60002e-17	-2.20783e-17	1.48503e-17	-2.17103e-17	1.38581e-17	5.78504e-17	1.16542e-16	-3.79536e-17	5.36187e-17	8.09538e-18	-1.51499e-16	2.50221e-17	-7.54342e-17	-3.56407e-17	-3.35117e-17	-3.63569e-17	-1.15123e-17	7.65381e-17	1.10391e-16	6.81799e-17	-8.61316e-17	6.25026e-17	-8.37924e-17	-1.39829e-17	-2.52816e-17	1.72421e-17	1.10181e-16	4.58125e-17	2.28931e-17	2.66829e-17	2.7887e-17	3.94748e-17	-4.44983e-17
238	MEM229	0.0342831	-0.00738662	-0.00219378	0.0227808	-0.0480988	0.0485514	-0.0319382	0.0142688	-0.0496869	-3.25234e-16	-1.0566e-17	-3.21187e-17	1.47425e-16	-1.59805e-17	-6.91524e-17	4.2895e-17	-1.02822e-16	-6.84953e-17	2.28931e-17	-7.2888e-17	-1.84249e-17	-5.61945e-17	-4.99127e-17	-1.42773e-16	-1.54128e-16	8.44889e-17	1.65062e-17	5.62734e-17	2.95166e-17	6.08927e-17	-1.09794e-16	2.81104e-17	1.36623e-16	-3.92153e-17	2.18996e-16	8.24388e-17	-5.06487e-17	-1.45612e-17	7.35943e-18	3.20916e-17	-1.06712e-17	-1.30998e-16	3.89261e-17	4.44194e-18	1.31451e-16	-3.93598e-17	-9.13736e-17	-3.89261e-17
239	MEM230	0.0261742	-0.0425621	0.00716952	-0.00236533	-0.121209	0.000880985	-0.0332952	-0.0329503	-0.0118652	4.05656e-17	8.33193e-18	-2.58328e-17	7.1582e-17	6.67146e-17	-3.3253e-17	1.73538e-17	1.46959e-17	-6.67482e-18	5.02043e-17	7.30711e-17	6.67162e-17	-1.21535e-16	-3.71643e-17	-2.92045e-17	1.00239e-17	4.74053e-17	-5.23045e-18	5.54487e-17	1.45126e-16	-6.53659e-17	-1.72659e-17	-4.46717e-17	-1.33932e-17	1.00662e-16	3.0195e-17	1.65768e-17	-1.71396e-16	4.56794e-17	-5.81034e-17	-2.06244e-16	9.83601e-17	-1.11068e-16	3.60013e-17	-2.9749e-17	-5.37671e-17	1.48444e-16	3.91051e-17	5.71654e-17
240	MEM231	0.00039048	0.00601437	0.0125794	0.0537451	-0.0211602	-0.0990658	-0.0560423	0.0636365	0.102151	1.28067e-16	4.93148e-17	-4.91045e-17	7.79311e-17	2.55872e-17	7.02037e-17	6.03605e-17	-1.05529e-17	3.7267e-17	1.64605e-16	-3.92982e-17	1.08056e-16	3.6692e-17	2.12504e-17	9.87347e-17	-3.93027e-16	4.19898e-17	-1.89735e-17	5.91383e-18	1.24838e-16	6.57749e-18	9.00052e-18	-2.99954e-17	-8.25702e-17	4.2435e-17	2.24594e-17	7.80888e-17	-4.59767e-17	-2.41179e-16	-8.85235e-17	6.08492e-17	-3.57721e-17	-8.09636e-17	4.81681e-17	-4.93312e-17	3.99953e-16	6.1333e-17	3.25951e-17	2.52521e-17
241	MEM232	-0.0121756	-0.00692505	0.00548816	0.0268158	-0.0325745	0.127975	0.0711712	-0.084424	-0.0894607	1.40539e-16	5.95786e-17	-1.40683e-16	5.31259e-17	7.56313e-17	7.37685e-17	-3.94781e-17	8.41998e-17	-1.52873e-17	-1.41932e-17	9.45178e-17	-2.12492e-16	-3.09359e-17	9.46377e-17	-8.52249e-17	-1.86338e-16	-3.50132e-17	-1.00525e-16	8.73341e-17	8.90031e-18	-1.4249e-17	5.09386e-17	9.53564e-18	-7.20107e-17	5.20351e-17	1.84459e-16	-1.3316e-17	-3.29992e-17	-2.02273e-16	-4.67981e-17	-9.52566e-17	-4.48465e-17	7.35056e-17	8.25406e-17	-8.53826e-17	1.90576e-16	-9.65071e-17	-1.06587e-16	-1.1254e-16
242	MEM233	0.024054	-0.0397418	-0.001512	-0.011942	0.0877045	0.0786252	-0.0531197	-0.0123458	0.0420553	1.61356e-16	9.47133e-17	-4.55168e-17	-4.54971e-17	5.64968e-17	7.69882e-17	5.69436e-17	-5.46438e-17	-5.29813e-17	1.17271e-16	7.23245e-17	-1.21158e-16	-1.81686e-17	1.8254e-17	3.75857e-17	2.28188e-16	1.1688e-17	9.32085e-17	5.26331e-18	-1.73587e-16	-8.48207e-17	-7.22424e-17	4.74749e-17	-7.62753e-17	7.41397e-17	1.21601e-16	-9.25777e-17	-8.73276e-17	-8.18605e-17	-2.48907e-17	-6.57211e-17	6.09716e-17	-9.68948e-17	2.72956e-17	1.80924e-16	3.92206e-17	3.24699e-16	6.39191e-17	-2.68291e-16
243	MEM234	-0.0185709	-0.00699803	0.000311652	0.0204531	0.0244961	0.0391564	-0.02181	-0.0305427	-0.0117925	-1.6974e-16	-1.51999e-16	2.89121e-19	3.48259e-17	-3.38271e-17	1.84906e-17	4.7994e-17	6.32911e-17	5.05961e-18	-1.78138e-16	-9.90172e-17	-1.15287e-16	6.28969e-17	1.85957e-17	-4.12654e-17	-4.27767e-17	1.48503e-17	1.89269e-16	-9.46213e-17	3.62715e-18	-5.45912e-17	1.01481e-16	1.41364e-16	6.28443e-17	7.02169e-17	-8.69464e-17	-8.94828e-17	-8.41078e-17	-1.63826e-16	-3.48522e-17	-1.94483e-17	3.7612e-17	-5.42758e-17	2.97006e-17	-7.55656e-18	2.99861e-16	-3.05876e-17	7.7389e-18	2.57508e-16
244	MEM235	-0.0107443	0.077822	0.00569076	-0.0295095	-0.0739809	-0.0484636	0.00835275	0.0415597	-0.0264664	9.81433e-17	7.69981e-17	-7.19253e-17	-3.8959e-17	-1.57702e-19	-4.9939e-18	-5.12532e-19	-8.58688e-17	-2.95692e-19	4.22445e-17	-5.9636e-17	-4.13114e-17	2.07083e-16	5.3139e-17	-2.13424e-17	-3.40893e-16	7.06374e-19	1.10129e-17	1.29579e-17	1.21989e-16	-8.69251e-17	-1.1494e-16	-1.27187e-16	-6.84953e-17	1.24092e-16	-4.74552e-17	2.85835e-18	5.15292e-17	-2.07286e-16	4.484e-17	-1.07005e-17	4.11865e-17	-7.52042e-17	2.15559e-17	1.6698e-16	-8.67e-17	9.64184e-17	5.93453e-17	-5.68648e-17
245	MEM236	0.0407533	0.00220265	-0.0122093	-0.04773	-0.0330589	0.0286906	-0.000607531	-0.0412978	-0.0431609	-7.7642e-17	9.38853e-17	-4.87562e-17	-2.60997e-17	2.97006e-17	4.52079e-18	2.15526e-18	4.92556e-17	-6.94678e-17	7.34629e-18	2.65597e-17	-1.20537e-16	-9.65926e-17	-2.51535e-17	8.90491e-17	-4.88877e-18	-3.12119e-17	-6.1425e-17	-6.4579e-17	1.22101e-16	-3.92415e-17	1.5761e-16	-1.03144e-16	2.70722e-17	1.02927e-16	1.97338e-16	-3.9373e-17	-6.28443e-17	1.17225e-17	-5.74036e-17	-4.30018e-17	-5.71933e-17	7.28847e-17	1.97916e-17	-8.06909e-18	-1.39947e-16	-9.35831e-17	2.44011e-17	-1.20379e-16
246	MEM237	0.00307055	0.135056	-0.0037993	0.00640587	0.0555403	-0.0331753	-0.00154794	0.051323	0.0279821	2.70459e-17	-4.54708e-17	2.54558e-17	-2.95954e-17	2.77819e-17	-2.04914e-17	1.45874e-18	9.20718e-17	3.95307e-17	9.9878e-18	-1.7068e-18	2.42401e-17	1.47911e-17	-1.63189e-16	9.40956e-18	-1.7229e-17	-3.90477e-18	-3.98066e-17	3.66789e-17	-4.9617e-17	-8.00371e-17	-2.93227e-17	1.0849e-16	2.24988e-17	1.16424e-16	-3.00948e-17	2.58349e-16	-2.05276e-16	1.79452e-16	1.16962e-17	5.4682e-17	8.2833e-17	3.22304e-17	1.22548e-18	-8.17423e-18	-3.56288e-18	6.46513e-17	-5.30167e-17	8.2107e-17
247	MEM238	0.000274017	0.0178587	0.0228045	0.0171908	0.00806057	0.053093	0.0205047	-0.0521218	-0.01509	1.27634e-16	-1.73052e-16	-7.85357e-17	2.28142e-17	1.20274e-16	-5.71407e-17	-7.54868e-17	1.85878e-16	-6.03474e-17	3.59035e-17	-5.33296e-17	-1.76101e-17	1.57176e-16	-1.21851e-16	-1.92607e-16	7.32789e-17	2.24068e-16	-1.69793e-16	1.80832e-17	6.20821e-17	-4.04769e-17	-1.03216e-16	2.02108e-16	-1.42983e-17	1.68216e-18	-1.18802e-17	-2.58632e-17	1.64746e-16	-1.4067e-16	-3.36431e-18	3.67183e-17	-9.47264e-17	1.12074e-16	-8.64208e-17	-4.484e-17	1.99924e-16	-7.52239e-17	6.97635e-17	1.58175e-16
248	MEM239	-0.0509269	-0.0399808	0.0106637	-0.0377434	-0.0186795	0.00025898	0.0147484	-0.00795276	0.0298945	7.15968e-17	-5.95588e-17	2.0107e-17	-8.05595e-17	-2.50746e-17	-6.03014e-17	3.97935e-17	6.21346e-17	-5.4105e-17	2.52586e-17	5.83794e-17	3.84727e-17	1.79452e-16	-8.36216e-17	9.82484e-17	2.32479e-17	-7.15902e-17	-1.86456e-16	5.85863e-17	1.12961e-16	-1.77218e-17	3.79536e-17	1.67706e-17	7.40412e-17	1.89453e-16	-4.31053e-17	-2.20257e-17	1.01534e-16	6.80222e-17	5.0675e-17	-2.68422e-16	1.23481e-16	-2.12372e-17	-1.48634e-16	-2.6034e-17	1.8029e-17	1.07789e-16	1.01489e-16	9.4319e-17
249	MEM240	0.0189649	-0.0220299	-0.00415001	0.0239234	-0.0324614	0.0517225	0.017215	-0.0116886	-0.0314458	9.34648e-17	-3.175e-16	-2.47067e-18	8.75575e-17	1.17094e-17	1.35e-17	1.36675e-18	8.94303e-17	6.1402e-17	-4.85394e-17	4.48055e-17	-2.41843e-17	-8.18868e-17	-1.54285e-17	-2.91749e-18	1.76889e-17	-8.04429e-17	5.7627e-17	-4.73698e-17	3.15897e-17	3.74181e-17	6.89339e-17	-4.51562e-17	-7.21093e-17	1.4824e-17	3.23684e-17	-7.40182e-17	-5.90726e-18	7.00986e-17	3.01474e-17	4.14153e-17	2.43847e-17	-4.31315e-17	6.88731e-17	-6.87713e-17	-5.54491e-17	-1.09077e-16	1.1102e-17	2.95182e-16
250	MEM241	-0.0333821	-0.00459039	-0.0099875	-0.0379368	0.0505425	-0.0474517	0.0179847	0.0142056	-9.38325e-05	-1.56125e-17	-1.05292e-16	1.37411e-16	6.57881e-17	-1.06186e-17	2.24857e-17	6.25026e-17	-1.14755e-16	4.83226e-17	-6.37774e-17	-1.42195e-17	-6.35014e-17	-1.70765e-16	-1.14071e-17	8.27411e-17	1.93711e-17	-2.242e-17	1.45428e-16	-6.37905e-17	-2.77162e-17	5.44269e-17	-6.45265e-18	-6.95236e-17	2.30245e-17	4.42092e-17	-4.92556e-17	3.94124e-17	-3.5483e-17	-8.64471e-17	3.18558e-17	-1.3541e-17	1.39041e-16	3.32752e-17	1.22061e-16	2.0107e-17	2.82328e-17	1.86509e-16	1.67706e-17	5.0307e-17
251	MEM242	-0.0120176	-0.0504406	-0.0065958	0.0105754	0.0183332	0.0149744	-0.0130483	-0.0487134	-0.0337555	-4.49681e-17	-1.0612e-16	-2.28372e-17	1.46675e-16	4.87776e-17	5.33004e-17	-6.1572e-17	-3.70649e-17	1.56362e-16	-1.19735e-16	-3.16392e-17	-5.03938e-17	-8.04741e-17	1.71653e-17	-8.52199e-17	8.84828e-17	1.21653e-16	-4.81513e-17	-2.48787e-17	-2.07808e-16	5.35004e-17	-9.48663e-17	1.65701e-17	1.08034e-17	2.70221e-17	-3.10673e-17	4.97702e-17	1.66875e-16	9.91273e-17	7.4483e-17	5.27567e-17	-9.07732e-18	1.03367e-16	3.36503e-17	-7.97887e-17	-1.89871e-16	-3.25694e-17	-8.84441e-18	3.93171e-17
252	MEM243	0.0235081	-0.0674513	0.0125782	-0.0562027	-0.00073145	-0.00325076	0.00767215	-0.0279376	-0.0538332	5.90069e-17	4.30783e-16	1.38903e-16	1.92574e-16	-7.00066e-17	2.0199e-17	-8.13349e-17	3.63372e-17	-1.4893e-17	-4.6946e-17	3.11067e-17	2.21013e-17	-2.67634e-17	1.46256e-16	-4.99127e-17	6.70497e-17	-1.72227e-16	7.08838e-17	1.64004e-16	-3.21647e-18	2.42237e-17	-5.46717e-17	-3.74157e-17	9.57383e-17	-1.07264e-16	4.29935e-17	-1.64503e-17	-1.65062e-17	1.41866e-17	-2.86755e-17	1.35913e-17	-8.8714e-17	3.09162e-18	3.59955e-17	6.60115e-17	-1.62718e-16	8.1923e-17	5.05986e-17	8.32109e-17
253	MEM244	-0.0147337	0.0411398	0.0185166	0.0207533	0.0585199	0.0485786	-0.00674899	0.0015533	-0.0195456	2.24188e-16	-8.44554e-17	-3.12456e-17	-1.77166e-18	-4.7049e-17	-9.95097e-17	6.39503e-17	-3.32041e-17	-6.76299e-17	2.29586e-16	-2.45853e-17	-8.6279e-17	-9.33355e-17	1.14236e-16	-5.38228e-17	-8.99961e-17	1.32324e-16	3.11254e-17	1.19093e-16	-1.24205e-16	-1.52235e-17	-6.18384e-17	-1.38589e-17	-3.45457e-17	-2.3552e-17	-1.65198e-16	7.13263e-17	1.06765e-16	-6.23067e-17	3.50815e-17	-3.5954e-17	7.43141e-17	8.58065e-17	-9.25939e-17	-1.56719e-16	6.73308e-17	-8.56198e-18	-7.21128e-17	1.03872e-16
254	MEM245	0.0709867	0.0223501	0.00749517	0.0193716	-0.0482587	-0.0319656	-0.0221516	0.00459887	-0.0161886	5.60281e-17	7.29382e-17	-2.01842e-16	-1.72762e-17	8.86697e-17	-1.96213e-17	1.02703e-16	7.18448e-18	-3.72609e-17	-4.41205e-17	-6.08997e-17	-3.43237e-17	-8.20281e-17	6.52344e-18	8.99595e-17	3.91097e-17	3.2466e-17	1.85084e-16	8.80863e-18	-1.29306e-17	2.29793e-17	-2.2879e-16	-6.60969e-17	5.71108e-17	3.508e-17	5.09135e-17	9.38872e-18	1.76118e-16	3.23739e-18	1.39545e-16	-7.75734e-17	-2.04081e-17	1.60859e-16	1.45257e-17	2.00141e-17	1.03215e-16	-6.23479e-17	-1.82529e-17	3.73811e-16
255	MEM246	-0.00371795	0.0243165	-0.00313324	-0.0779792	-0.0309607	0.026228	-0.00397833	-0.0102383	0.00225519	-3.36431e-17	-2.98583e-17	1.93448e-17	-7.14916e-18	-7.99024e-17	3.10148e-17	6.22398e-17	3.36431e-18	-2.83864e-17	2.54426e-17	-1.63695e-16	3.7428e-17	8.07435e-17	-3.78485e-18	5.21468e-17	1.56861e-16	-7.88511e-18	6.18192e-17	-1.27213e-16	5.98742e-16	1.81883e-17	-2.68094e-18	4.79152e-17	-3.70074e-17	9.25186e-17	2.6494e-17	-3.34329e-17	2.9648e-17	-1.59384e-16	-7.90613e-17	4.43406e-17	7.94819e-17	-4.45771e-17	4.36309e-17	-3.93204e-17	-8.70122e-17	2.2604e-16	-4.33944e-17	-3.63766e-17
256	MEM247	-0.00980571	-0.00651497	0.00144013	0.0378969	-0.00966456	0.0242733	0.00171437	0.0156863	0.00345902	2.11952e-16	7.40149e-17	5.04647e-18	3.36431e-18	4.71004e-17	1.03453e-16	-2.96059e-16	-1.34572e-17	-2.01859e-17	7.31738e-17	-5.04647e-18	7.99024e-18	4.71004e-17	-7.99024e-17	5.71933e-17	-1.76626e-17	-1.14807e-16	5.88755e-18	1.27844e-16	2.43072e-16	-1.97653e-17	1.74944e-16	2.85231e-16	-1.51394e-17	-1.68216e-18	-6.56041e-17	2.27091e-17	4.87825e-17	-2.3382e-16	2.08587e-16	-1.00036e-16	-2.20362e-16	8.24256e-17	2.75874e-16	-4.20539e-18	-3.99512e-18	3.86896e-17	-9.2834e-17	-1.48871e-16
257	MEM248	0.00520459	0.0294014	-0.000374185	-0.0304717	-0.0158128	-0.106947	0.0317383	0.0250248	0.0737885	-2.5574e-17	4.62462e-17	-3.47208e-17	1.66901e-18	3.59561e-17	-3.16324e-17	3.16193e-17	-2.34713e-17	-8.37135e-18	7.20502e-17	-9.08989e-17	5.24228e-17	-6.34751e-18	-5.76533e-17	8.68939e-17	-2.8686e-16	-8.31517e-17	-4.8178e-17	-2.58632e-17	1.68446e-16	-3.38074e-18	-5.41083e-17	-2.12152e-16	-3.58247e-17	1.8162e-17	3.29413e-16	-3.03708e-17	-7.0874e-17	3.19951e-16	1.78729e-17	3.11708e-17	1.0294e-16	1.10786e-17	-6.85807e-17	-8.73933e-18	1.22353e-16	3.57655e-17	5.31037e-17	5.513e-17
258	MEM249	-0.0247377	-0.0012371	-1.82736e-05	0.0414443	-0.0149363	-0.011494	0.00237816	0.00927792	0.0441094	-4.82542e-16	5.03346e-16	1.23533e-17	-8.27279e-17	3.04628e-17	5.94011e-18	-9.15067e-17	-2.42598e-17	-2.60964e-16	1.48319e-16	1.43207e-16	-8.44364e-18	1.45086e-17	-1.1825e-16	-1.15806e-16	6.24303e-17	-2.0636e-17	-1.43115e-17	-1.00621e-16	3.17408e-17	1.61053e-17	-1.8851e-16	2.80685e-17	2.41679e-17	1.57965e-17	-1.48739e-16	-8.66048e-18	-1.30893e-17	-2.75716e-17	-3.11041e-16	7.72083e-19	1.55599e-17	2.68159e-17	-2.90435e-18	-1.42057e-16	-1.43318e-17	-1.08328e-16	2.45588e-19	1.21789e-16
259	MEM250	-0.0177485	-0.0688165	-0.00176099	-0.00548975	0.02392	0.0463315	-0.0408345	-0.0676394	0.0333208	-1.64122e-16	-5.14152e-16	-7.6571e-17	-9.99257e-17	1.93185e-17	-5.72459e-17	-1.45053e-17	7.80297e-17	1.14875e-16	-1.38062e-16	-1.00375e-16	4.10527e-17	-8.50425e-17	-7.49414e-18	3.6646e-17	8.69333e-18	9.81667e-17	-1.47254e-17	-9.83568e-17	1.20943e-16	-8.77892e-17	4.64227e-17	2.63615e-17	-2.8163e-17	1.65094e-17	-9.8508e-17	-3.68629e-18	1.38318e-17	8.36446e-17	-1.3362e-16	1.14575e-17	3.95356e-17	1.01825e-16	-6.48312e-17	7.06062e-17	3.33233e-17	-1.08141e-17	2.35569e-17	-3.18777e-16
260	MEM251	-0.0104544	-0.0373986	0.000310046	-0.0233227	0.0198321	0.0370488	-0.0159712	-0.033535	0.0123252	-3.57458e-17	-2.52291e-16	-3.16061e-18	3.28546e-21	6.55647e-17	-2.67042e-17	1.54338e-16	-5.88295e-17	8.44265e-17	-5.86668e-17	-1.47748e-16	-5.27661e-17	-3.58345e-17	1.1784e-16	-5.66939e-17	1.86259e-16	-1.25209e-17	1.06745e-17	-7.46621e-17	-1.30377e-16	1.51369e-16	5.4243e-18	1.66988e-16	1.03367e-16	-1.7978e-17	2.80881e-16	-2.16085e-17	9.74468e-17	-9.40168e-17	-5.54192e-17	5.75777e-19	1.66901e-18	3.07289e-17	7.11582e-17	5.12992e-17	-2.6634e-16	5.61682e-17	5.37604e-18	-3.78879e-17
261	MEM252	-0.0755764	-0.0519806	0.0132073	-0.0776234	-0.0182834	-0.0191309	0.0102925	-0.00357975	0.0205849	-1.88454e-17	1.29349e-16	-2.84455e-17	-4.94265e-17	-1.51131e-17	3.958e-17	-9.45096e-17	-1.78072e-17	-4.67587e-17	9.97072e-17	5.77872e-17	8.75756e-17	5.52615e-18	-6.54957e-17	-8.48963e-18	5.1018e-16	7.01347e-17	1.00795e-16	5.22257e-17	-1.25324e-16	2.55839e-17	-3.37663e-17	4.23008e-16	-1.28396e-17	-1.18145e-17	-5.58594e-17	1.82573e-17	2.26237e-17	1.37753e-16	-2.49169e-17	-4.91558e-17	-9.03502e-18	5.19103e-19	1.33817e-17	2.59289e-17	-6.0972e-17	8.5422e-19	7.27385e-17	-1.0624e-16
262	MEM253	0.0274181	-0.0480457	-0.014107	-0.0560616	0.00958883	0.0103462	-0.0688282	-0.0301936	-0.0254683	-1.30663e-17	2.98405e-16	-8.98475e-17	-7.87755e-17	5.35957e-17	-1.42104e-16	3.89853e-17	-6.02882e-17	-7.55697e-17	4.48367e-17	-5.38259e-17	1.83838e-16	7.34457e-17	-7.93496e-17	-2.02835e-16	-9.5317e-17	1.39277e-16	-7.898e-17	1.59972e-16	-3.83541e-17	-1.06182e-17	-2.34726e-18	-5.88503e-17	1.73045e-17	5.1199e-17	1.08949e-16	7.36305e-17	1.92553e-17	-3.00998e-17	1.07004e-16	-1.19713e-16	-2.84718e-17	-2.43847e-17	-4.76347e-17	-1.48807e-17	1.63764e-17	3.18801e-17	2.71774e-17	-5.295e-16
263	MEM254	0.00930284	0.0195007	-0.0482478	-0.0755095	-0.0381749	-0.0604618	-0.0143172	-0.0268222	-1.23761e-05	9.42007e-17	3.36431e-18	6.72862e-18	8.07435e-17	-1.74944e-16	1.91766e-16	2.69145e-16	-1.07658e-16	2.67463e-16	-2.60734e-16	-1.06396e-16	1.68216e-18	-4.37361e-17	-6.89684e-17	2.55688e-16	8.41078e-17	-2.08587e-16	8.41078e-17	-1.00929e-16	1.03453e-16	8.41078e-19	-1.11863e-16	2.51062e-16	-1.41301e-16	3.70074e-17	1.34572e-17	-3.53253e-17	-1.44665e-16	9.08364e-17	2.69145e-17	6.28706e-17	-7.06506e-17	1.21115e-16	4.54182e-17	4.87825e-17	-6.35014e-17	4.54182e-17	1.1691e-16	6.64452e-17
264	MEM255	-0.0284947	0.035362	-0.0178866	-0.0236583	-0.02521	0.0040126	-0.0370061	-0.0108284	-0.00177851	-3.36431e-17	1.77047e-16	7.77997e-17	-4.03717e-17	-6.72862e-17	-5.6983e-17	-5.97165e-17	-3.02788e-17	-4.35258e-17	-2.52323e-17	4.1318e-17	1.01981e-16	4.24744e-17	-9.54624e-17	-4.20539e-18	-5.00441e-17	6.33963e-17	1.94499e-16	4.03717e-17	5.67728e-17	-3.43791e-17	5.5406e-17	1.63747e-17	5.46701e-18	3.1961e-17	-1.73683e-16	-3.99512e-17	4.20539e-19	4.41566e-17	7.82203e-17	2.55346e-17	7.99024e-18	-1.05135e-18	3.36431e-17	-1.11233e-16	1.39829e-16	1.68216e-18	-1.0934e-17	-5.37239e-16
265	MEM256	0.0195118	0.00413409	-0.0208469	0.0184795	-0.00579252	0.014262	0.0241674	0.00411545	-0.00283719	-2.22518e-16	2.14186e-16	-1.91674e-16	3.49573e-17	-6.52624e-17	5.31325e-17	-3.2053e-17	-7.14654e-17	-1.27183e-16	1.76528e-17	9.14081e-17	-5.35037e-17	5.30536e-17	-8.92331e-17	-8.21102e-17	8.34244e-17	-2.95692e-19	-4.31282e-17	1.54068e-16	1.02935e-16	-1.46679e-17	2.44993e-16	9.86739e-17	2.74665e-17	-9.47527e-18	-5.61354e-17	5.18774e-18	-3.26706e-17	4.9985e-17	-1.30104e-18	2.94151e-18	1.6171e-17	-4.97879e-17	-2.02943e-17	7.46161e-17	-1.23001e-16	1.23698e-17	3.52707e-17	2.79221e-16
266	MEM257	-0.00164603	-0.0308457	-0.0401174	0.0216817	-0.0375278	0.0384733	-0.0160573	-0.0274003	0.00945945	-3.72898e-16	-4.97143e-16	5.34963e-17	-5.88763e-17	4.36638e-17	1.1509e-16	-1.16458e-16	-5.40311e-17	-1.17414e-17	-8.67481e-17	-8.12229e-17	-2.04327e-17	-4.91365e-17	5.66459e-17	2.68406e-17	-1.43542e-17	1.55751e-18	2.02631e-17	4.19783e-17	-5.82956e-17	2.02604e-17	-7.34919e-17	-6.16656e-17	1.44445e-17	-4.05787e-17	8.03271e-17	-8.70738e-17	1.66556e-17	3.57212e-17	-1.48437e-16	-3.42879e-17	-4.40252e-18	1.00013e-16	-6.64033e-18	-1.58395e-16	9.40835e-17	2.70525e-17	1.05027e-17	-6.57942e-17
267	MEM258	-0.00771404	-0.0519154	0.00442128	0.0385149	0.00572278	0.0297207	0.0293543	-0.0188631	0.0115762	2.539e-17	1.50474e-17	-7.37257e-18	1.86851e-16	1.15175e-16	-1.19998e-16	4.91505e-18	9.63297e-17	-2.21703e-17	6.75885e-17	-2.78311e-17	7.26744e-17	4.74421e-17	6.67343e-17	-4.38938e-17	-3.23158e-17	3.75167e-17	1.44232e-17	2.4641e-17	1.05365e-16	-1.00499e-16	2.54081e-17	-1.30477e-16	1.11311e-16	7.57364e-17	-1.02283e-16	-2.00216e-17	2.8163e-17	-7.76157e-17	1.87166e-16	-1.38169e-16	-6.07022e-17	6.89355e-17	-9.10927e-17	1.90491e-17	6.76296e-17	9.9878e-17	1.50507e-17	1.98731e-16
268	MEM259	0.0322036	-0.0035265	0.00271177	0.0417101	0.00284388	0.000654645	-0.00914794	0.00933618	-0.00587446	-6.41979e-18	5.54175e-17	5.52089e-17	-4.79086e-17	-1.60955e-17	-5.28368e-17	-1.51476e-17	-3.81278e-17	-2.34319e-17	1.28066e-16	-4.35654e-17	-3.07355e-18	-2.12775e-17	4.24687e-17	2.425e-17	5.63144e-16	-7.09742e-18	1.03007e-17	2.87371e-17	-7.32863e-18	-2.25084e-16	1.68828e-17	-5.57018e-16	3.74099e-17	1.51295e-17	4.58946e-17	7.13742e-17	9.8899e-17	-2.83585e-17	-2.43978e-17	6.65639e-17	-4.86084e-17	-1.56684e-17	-1.00234e-16	1.29201e-18	8.68245e-18	6.1278e-17	-1.05317e-17	2.20791e-17
269	MEM260	0.00247163	0.0261831	0.0034922	0.0225074	0.00855906	-0.00294958	-0.00795122	0.00862285	0.0008665	-2.62705e-17	2.96743e-17	1.56651e-17	1.45152e-17	1.39435e-17	2.97663e-18	-3.86633e-17	-1.63287e-16	1.43072e-16	-9.265e-17	6.61125e-17	1.18967e-17	-1.93054e-17	-4.76753e-17	2.47987e-17	1.16358e-16	4.13968e-18	4.2504e-17	-4.415e-17	3.7451e-17	-9.58369e-18	2.89515e-17	6.46801e-17	1.12231e-17	5.07078e-17	1.71586e-16	2.25711e-18	5.30405e-17	5.08655e-17	7.80626e-18	5.58257e-17	2.36816e-17	-3.05745e-17	-1.06515e-17	4.81451e-17	7.2822e-17	-2.20126e-19	1.36386e-16	2.9234e-17
270	MEM261	0.0269875	-0.0186288	-0.0168705	0.0354706	-0.0028534	0.0529179	0.0201178	-0.00509602	0.0482152	8.45678e-17	3.63346e-16	-3.51544e-18	-5.59645e-17	4.8822e-17	2.65659e-16	2.9188e-17	-1.49029e-17	-6.36295e-17	-1.38154e-17	2.5712e-17	3.45877e-17	7.00855e-17	9.47856e-18	-2.96611e-17	1.73341e-17	4.04802e-17	-2.96053e-17	-8.96931e-18	1.26001e-16	-2.59354e-17	1.10539e-16	2.49851e-17	5.30865e-17	9.68554e-18	1.31418e-18	-2.66779e-18	-3.11527e-17	-7.30687e-18	-1.20077e-16	2.54264e-17	6.6662e-17	9.8393e-17	-4.76786e-17	1.79449e-16	-2.17389e-17	-8.85563e-17	-6.86941e-17	3.84974e-17
271	MEM262	-0.00434248	-0.0140851	-0.0111809	0.029989	0.00301124	0.0381433	0.00123972	-0.0125831	-0.0263756	-1.16272e-16	4.48464e-16	4.52802e-17	-1.15813e-18	5.19201e-17	-5.43247e-17	-5.98907e-17	-2.58007e-17	-4.42059e-17	4.03701e-18	2.1528e-17	3.50275e-17	2.63354e-17	7.01955e-17	-1.21802e-16	1.65094e-17	7.05635e-18	-9.66665e-17	-6.29437e-17	1.93395e-17	-1.78043e-17	3.10918e-17	2.26964e-17	5.75991e-17	-6.04295e-17	1.29676e-16	2.81359e-17	8.63715e-17	-4.37853e-17	8.51986e-17	-4.11268e-18	-6.09584e-17	-7.7095e-17	-2.02146e-17	9.92751e-17	-4.85036e-17	-1.57398e-17	-9.05032e-17	-6.27441e-18
272	MEM263	-0.00645763	0.00725252	-0.000498482	-0.00583728	-0.00974755	-0.00349393	-0.00157222	-0.00121248	0.00120601	6.80485e-17	1.77678e-17	-5.56524e-17	-1.50435e-16	-1.95025e-17	9.06459e-17	-9.82879e-17	-2.41593e-16	4.01976e-17	-1.08898e-16	3.17096e-17	7.34103e-17	-2.06097e-17	2.35945e-16	1.36333e-16	-1.45907e-17	-8.86417e-17	7.29997e-17	-9.41547e-17	1.68608e-16	4.45714e-17	-6.17199e-17	1.05463e-18	2.62114e-17	6.99146e-18	-5.1976e-18	-2.03518e-17	5.08064e-17	-3.97738e-17	-5.14503e-17	-1.12549e-17	-5.47259e-17	5.09411e-17	9.20586e-18	4.56416e-17	-1.6974e-17	-3.0885e-17	5.1861e-18	3.58575e-17
[truncated: 224 more columns]
